# Supplementary material
Source: publisher figshare collection journal article supplement (https://future-science-group.figshare.com/articles/dataset/_/21952937)
Supplement: Supplementary file 1 [file 1]

**Supplementary table 1 the DEGs of GSE27262, GSE63459 and GSE118370**

| **GSE27262** | **Gene name** | **p.adj** | **LogFC** | **GSE63459** | **Gene name** | **p.adj** | **LogFC** | **GSE118370** | **Gene name** | **p.adj** | **LogFC** |
| --- | --- | --- | --- | --- | --- | --- | --- | --- | --- | --- | --- |
|  | GRK5 | 1.11E-27 | -2.61899 |  | MME | 2.92E-20 | 1.997141 |  | RTKN2 | 0.00051 | -3.75591 |
|  | LIN7A | 6.95E-27 | -3.078 |  | SH3GL3 | 2.92E-20 | 1.114986 |  | LINC01545 | 0.00051 | -3.7617 |
|  | CAV1 | 7.04E-27 | -2.9126 |  | EDNRB | 3.18E-20 | 1.639396 |  | CCM2L | 0.00051 | -2.71645 |
|  | KANK3 | 2.68E-26 | -2.6213 |  | AGER | 2.18E-19 | 1.346046 |  | CDH5 | 0.00051 | -2.4841 |
|  | PTPRB | 3.06E-26 | -3.06181 |  | ADAMTS8 | 2.18E-19 | 1.642349 |  | SLC6A4 | 0.000572 | -6.17218 |
|  | CCBE1 | 5.56E-26 | -3.30175 |  | SPTBN1 | 3.89E-19 | 1.189215 |  | EDNRB | 0.000572 | -3.3917 |
|  | ROBO4 | 6.24E-26 | -2.75224 |  | FGFR4 | 5.38E-19 | 1.424416 |  | SEMA6A | 0.000675 | -3.37261 |
|  | CDO1 | 6.45E-26 | -3.00653 |  | MCEMP1 | 1.32E-18 | 3.255307 |  | PTPRB | 0.000746 | -2.81876 |
|  | AGER | 1.17E-25 | -4.26025 |  | CA4 | 1.64E-18 | 2.575773 |  | GIMAP8 | 0.000776 | -3.18737 |
|  | EDNRB | 1.17E-25 | -3.41752 |  | ITLN2 | 2.44E-18 | 2.749884 |  | SDPR | 0.000776 | -2.62855 |
|  | SGCG | 1.42E-25 | -2.80142 |  | STARD13 | 1.59E-17 | 1.059134 |  | CLEC1A | 0.000776 | -2.55948 |
|  | CELF2 | 1.93E-25 | -1.68861 |  | TEK | 1.83E-17 | 1.995343 |  | RHOJ | 0.000979 | -2.43629 |
|  | SPOCK2 | 6.63E-25 | -2.97489 |  | ACADL | 2.89E-17 | 1.217751 |  | ABCA9 | 0.001481 | -2.06022 |
|  | RGCC | 7.89E-25 | -2.58952 |  | CLEC3B | 4.59E-17 | 2.028063 |  | LOC105379426 | 0.001481 | -3.852 |
|  | GPM6A | 9.01E-25 | -4.79196 |  | TMEM100 | 1.96E-16 | 2.807361 |  | MESDC1 | 0.001542 | -2.29254 |
|  | SPP1 | 9.73E-25 | 6.35329 |  | CD300LG | 1.99E-16 | 2.123881 |  | TRPC6 | 0.001546 | -2.25075 |
|  | SPTBN1 | 1.97E-24 | -2.88291 |  | GDF10 | 2.37E-16 | 1.569549 |  | VIPR1 | 0.001904 | -3.05657 |
|  | ADAMTSL3 | 2.61E-24 | -3.02456 |  | SLC1A1 | 2.69E-16 | 1.010237 |  | ADARB1 | 0.001904 | -2.64526 |
|  | STARD13 | 2.70E-24 | -1.98715 |  | STX11 | 2.85E-16 | 1.487576 |  | PCAT19 | 0.002003 | -2.22948 |
|  | RASIP1 | 2.70E-24 | -2.26668 |  | SDPR | 3.17E-16 | 2.23438 |  | FENDRR | 0.002003 | -3.22278 |
|  | IGSF10 | 4.36E-24 | -3.59529 |  | TMEM74B | 3.31E-16 | 1.276113 |  | LOC100507487 | 0.002003 | -3.48695 |
|  | GRIA1 | 7.71E-24 | -3.05805 |  | MACF1 | 3.68E-16 | 1.172523 |  | FAT3 | 0.002003 | -3.14766 |
|  | ARHGAP6 | 1.26E-23 | -2.41241 |  | FAM189A2 | 4.15E-16 | 1.507636 |  | PECAM1 | 0.002003 | -2.30932 |
|  | TNNC1 | 1.33E-23 | -3.51966 |  | ACVRL1 | 6.08E-16 | 1.365993 |  | LOC101930541 | 0.002003 | -2.6289 |
|  | FAM107A | 1.75E-23 | -4.08528 |  | COX4I2 | 6.24E-16 | 1.225388 |  | BEX1 | 0.002003 | -3.41391 |
|  | EFCC1 | 2.01E-23 | -1.90291 |  | TCF21 | 6.67E-16 | 1.872183 |  | DST | 0.002003 | -2.0847 |
|  | FGD5 | 2.01E-23 | -1.86491 |  | CLIC5 | 7.8E-16 | 1.801579 |  | CLDN18 | 0.002003 | -3.19733 |
|  | EMP2 | 2.14E-23 | -2.16381 |  | AGRP | 1.08E-15 | 1.643534 |  | GPM6A | 0.002003 | -3.02546 |
|  | SLIT2 | 2.23E-23 | -2.28203 |  | GPM6B | 1.23E-15 | 1.094231 |  | NOTCH4 | 0.002151 | -2.17817 |
|  | FABP4 | 2.41E-23 | -4.11172 |  | HYAL1 | 1.37E-15 | 1.233871 |  | SHANK3 | 0.002313 | -2.46928 |
|  | KCNK3 | 2.41E-23 | -3.00347 |  | FCN3 | 1.37E-15 | 2.178871 |  | TMEM74 | 0.002418 | 3.761782 |
|  | QKI | 2.41E-23 | -1.98225 |  | FABP4 | 1.37E-15 | 2.167684 |  | C12orf74 | 0.002565 | 4.642087 |
|  | NCKAP5 | 2.54E-23 | -3.93088 |  | ANKRD1 | 1.41E-15 | 1.530333 |  | FHL1 | 0.002574 | -2.88339 |
|  | GPM6B | 2.70E-23 | -2.79626 |  | HSPA12B | 1.79E-15 | 1.441264 |  | TIMP3 | 0.002574 | -2.48334 |
|  | TOX3 | 3.51E-23 | 4.863957 |  | GPX3 | 1.79E-15 | 1.89246 |  | PRX | 0.00265 | -3.51781 |
|  | FAM189A2 | 3.51E-23 | -2.09894 |  | CAV1 | 1.79E-15 | 2.6089 |  | ROBO4 | 0.002791 | -3.13744 |
|  | BTNL9 | 5.45E-23 | -3.48786 |  | TNNC1 | 2.73E-15 | 1.91237 |  | TCF21 | 0.002791 | -2.64551 |
|  | ADARB1 | 6.06E-23 | -2.21621 |  | FOXF1 | 3.35E-15 | 1.278967 |  | TOX3 | 0.002909 | 3.167365 |
|  | STARD9 | 6.66E-23 | -1.86081 |  | GOLM1 | 3.9E-15 | -1.29314 |  | MACF1 | 0.002961 | -1.65414 |
|  | ASPA | 6.82E-23 | -2.44446 |  | COL13A1 | 3.94E-15 | 1.070799 |  | CD36 | 0.002977 | -2.53181 |
|  | FHL1 | 7.35E-23 | -2.64394 |  | CDH5 | 4.24E-15 | 1.767612 |  | BLACAT1 | 0.002986 | 2.303847 |
|  | ANOS1 | 7.54E-23 | -2.87081 |  | PTPRB | 4.6E-15 | 1.57676 |  | SASH1 | 0.002986 | -1.79855 |
|  | CDH5 | 7.89E-23 | -2.60625 |  | RASIP1 | 5.94E-15 | 1.547456 |  | GRK5 | 0.002986 | -1.86568 |
|  | CRYAB | 8.88E-23 | -2.25385 |  | FHL1 | 6.33E-15 | 2.030898 |  | FAM107A | 0.002986 | -2.82515 |
|  | SLIT3 | 1.08E-22 | -1.73653 |  | PDZD2 | 7.25E-15 | 1.217529 |  | TBX3 | 0.002986 | -3.32909 |
|  | S1PR1 | 1.16E-22 | -2.36443 |  | LPL | 8.42E-15 | 1.655965 |  | SPOCK2 | 0.002986 | -2.01642 |
|  | MME | 1.22E-22 | -2.94721 |  | CAV2 | 1E-14 | 1.180456 |  | NDRG4 | 0.002986 | -2.83399 |
|  | MYZAP | 1.23E-22 | -3.39859 |  | FAM107A | 1.03E-14 | 2.856655 |  | KCNK3 | 0.002986 | -2.25389 |
|  | AGTR1 | 1.56E-22 | -3.29639 |  | RRAS | 1.3E-14 | 1.271484 |  | BTNL9 | 0.002986 | -3.61093 |
|  | HIGD1B | 1.87E-22 | -2.25076 |  | LIMS2 | 1.45E-14 | 1.13467 |  | LOC400794 | 0.002986 | 3.461619 |
|  | KIAA1462 | 2.11E-22 | -2.55747 |  | PAFAH1B3 | 1.49E-14 | -1.52824 |  | TNR | 0.002986 | -4.08578 |
|  | SDPR | 2.20E-22 | -3.20745 |  | AHNAK | 1.55E-14 | 1.316368 |  | GSTM5 | 0.003102 | -2.45719 |
|  | NEBL | 2.37E-22 | -2.4769 |  | HBA2 | 1.73E-14 | 2.855727 |  | FGFR4 | 0.00322 | -2.30497 |
|  | TEK | 2.44E-22 | -3.18791 |  | CELF2 | 1.73E-14 | 1.0883 |  | STXBP6 | 0.00322 | -3.69032 |
|  | LDB2 | 2.47E-22 | -2.44705 |  | HIGD1B | 2E-14 | 1.562426 |  | KANK3 | 0.00358 | -3.27129 |
|  | EPAS1 | 2.86E-22 | -2.19919 |  | BTNL9 | 2.39E-14 | 1.046852 |  | JAM2 | 0.00358 | -2.49279 |
|  | LIMS2 | 2.92E-22 | -2.02117 |  | ADRB2 | 3.77E-14 | 1.520464 |  | SPTBN1 | 0.00358 | -2.36676 |
|  | ACVRL1 | 2.92E-22 | -2.5602 |  | OCIAD2 | 4.3E-14 | -1.56093 |  | FOXF1 | 0.00358 | -2.67186 |
|  | OCIAD2 | 3.88E-22 | 2.82129 |  | JAM2 | 4.38E-14 | 1.241456 |  | MME | 0.00358 | -4.35164 |
|  | RTKN2 | 4.44E-22 | -4.42693 |  | NTNG1 | 4.38E-14 | 1.179238 |  | ACSS3 | 0.003627 | -2.18595 |
|  | TGFBR3 | 5.31E-22 | -2.53781 |  | PID1 | 4.8E-14 | 1.033267 |  | NRG3 | 0.003627 | -3.28461 |
|  | CAV2 | 5.93E-22 | -2.91437 |  | GPIHBP1 | 7.25E-14 | 2.091162 |  | OR5E1P | 0.003627 | -2.45303 |
|  | CDH19 | 6.62E-22 | -2.89112 |  | LIMCH1 | 7.25E-14 | 1.45034 |  | EMCN | 0.003627 | -3.41256 |
|  | CA4 | 8.83E-22 | -5.04333 |  | FXYD6 | 7.25E-14 | 1.043619 |  | SHROOM4 | 0.003627 | -2.40121 |
|  | DPP6 | 8.83E-22 | -3.16877 |  | CCM2L | 7.38E-14 | 1.140643 |  | FLI1 | 0.003674 | -2.00271 |
|  | TCF21 | 1.72E-21 | -3.17173 |  | GRK5 | 7.62E-14 | 1.296688 |  | TEK | 0.003674 | -2.36785 |
|  | STXBP6 | 1.72E-21 | -4.72605 |  | PCOLCE2 | 7.72E-14 | 1.507716 |  | LIMS2 | 0.003689 | -1.54551 |
|  | SERTM1 | 1.72E-21 | -3.63406 |  | EPAS1 | 7.78E-14 | 2.056023 |  | TMEM100 | 0.003811 | -4.45837 |
|  | CCDC85A | 1.89E-21 | -3.07435 |  | PECAM1 | 8E-14 | 1.321214 |  | MCAM | 0.003811 | -1.75541 |
|  | LIMCH1 | 1.91E-21 | -1.9422 |  | HSD17B6 | 8.25E-14 | 1.71285 |  | FHL5 | 0.003811 | -2.909 |
|  | ECSCR | 1.94E-21 | -1.98043 |  | CD36 | 8.71E-14 | 1.750743 |  | ANKRD29 | 0.003811 | -2.90471 |
|  | SH2D3C | 2.00E-21 | -2.07797 |  | LTBP4 | 8.88E-14 | 1.257289 |  | FEZ1 | 0.003811 | -1.88424 |
|  | ADGRL2 | 2.02E-21 | -2.56913 |  | NDRG4 | 9.65E-14 | 1.557372 |  | CBR3 | 0.003811 | 1.766857 |
|  | FRMD3 | 2.03E-21 | -2.21343 |  | NME1 | 1.05E-13 | -1.45659 |  | SH2D3C | 0.003838 | -2.48082 |
|  | COL10A1 | 2.65E-21 | 5.37571 |  | SPOCK2 | 1.17E-13 | 1.908073 |  | AKT3 | 0.003838 | -1.73203 |
|  | STX11 | 2.79E-21 | -2.81324 |  | TBX3 | 1.17E-13 | 1.023374 |  | IGSF10 | 0.003957 | -3.51078 |
|  | DACH1 | 3.14E-21 | -3.12861 |  | ESAM | 1.27E-13 | 1.344738 |  | KLRF1 | 0.003964 | -2.69129 |
|  | DOCK4 | 3.24E-21 | -1.65412 |  | SASH1 | 1.3E-13 | 1.195029 |  | CAV2 | 0.003964 | -2.00271 |
|  | SHANK3 | 3.40E-21 | -1.96659 |  | LOC401286 | 1.34E-13 | 1.502719 |  | QKI | 0.003976 | -2.08899 |
|  | TMEM74B | 3.60E-21 | -1.98463 |  | PAPSS2 | 1.37E-13 | 1.264139 |  | KIAA1462 | 0.004078 | -2.34656 |
|  |  | 3.88E-21 | -2.82676 |  | ICAM2 | 1.37E-13 | 1.176871 |  | FAM65A | 0.004095 | -1.54774 |
|  | KL | 4.18E-21 | -2.83789 |  | SLIT2 | 1.44E-13 | 1.575822 |  | CARMN | 0.004211 | -1.71276 |
|  | GIMAP8 | 4.56E-21 | -2.60605 |  | TIMP3 | 1.74E-13 | 1.852485 |  | LOC101927699 | 0.004235 | -2.48815 |
|  | PDLIM2 | 5.19E-21 | -1.87281 |  | PLAC9 | 1.95E-13 | 1.877763 |  | EPB41L2 | 0.004271 | -1.76813 |
|  | ADRA1A | 5.34E-21 | -2.93496 |  | RGCC | 2.47E-13 | 1.894248 |  | PROM2 | 0.004271 | 2.380515 |
|  | AOC3 | 5.37E-21 | -2.29551 |  | FGD5 | 2.47E-13 | 1.147459 |  | STARD9 | 0.004335 | -1.69503 |
|  | DENND3 | 5.53E-21 | -1.87763 |  | STXBP6 | 2.52E-13 | 1.605287 |  | CAV1 | 0.004366 | -2.45117 |
|  | NTNG1 | 5.62E-21 | -2.27429 |  | ADARB1 | 2.77E-13 | 1.027432 |  | IL7R | 0.004366 | -2.26288 |
|  | HSPA12B | 6.33E-21 | -2.06922 |  | S1PR1 | 2.77E-13 | 1.633294 |  | C10orf35 | 0.004418 | 1.761521 |
|  | PTRF | 7.17E-21 | -1.60782 |  | GPC3 | 3.06E-13 | 1.557226 |  | AGER | 0.004574 | -2.75325 |
|  | ADIRF | 7.17E-21 | -3.04847 |  | BMPR2 | 3.08E-13 | 1.099892 |  | KCNT2 | 0.004644 | -2.06052 |
|  | ANGPTL1 | 7.72E-21 | -2.53118 |  | ADIRF | 3.26E-13 | 2.257102 |  | GPX3 | 0.004651 | -2.34168 |
|  | GOLM1 | 7.72E-21 | 3.030925 |  | RAMP3 | 3.55E-13 | 1.665704 |  | TMEM246 | 0.004651 | -2.13277 |
|  | ABCC3 | 8.68E-21 | 3.699646 |  | ADH1B | 3.98E-13 | 1.848123 |  | MTMR9LP | 0.004651 | -1.77528 |
|  | PCAT19 | 8.73E-21 | -2.22954 |  | PPP1R14B | 4.15E-13 | -1.06156 |  | SEMA5A | 0.004651 | -2.24391 |
|  | ST6GALNAC5 | 8.73E-21 | -2.25864 |  | C10orf67 | 4.31E-13 | 1.056479 |  | ARHGEF6 | 0.004651 | -1.6302 |
|  | LYVE1 | 9.33E-21 | -3.25825 |  | CLDN18 | 6.06E-13 | 2.460446 |  | ADRB2 | 0.004651 | -2.22113 |
|  | ERG | 1.04E-20 | -1.98824 |  | FMO2 | 6.68E-13 | 1.897009 |  | INSC | 0.004651 | -2.97357 |
|  | SEMA5A | 1.19E-20 | -1.98389 |  | RAMP2 | 6.77E-13 | 1.272533 |  | NDRG2 | 0.004651 | -1.9643 |
|  | TACC1 | 1.26E-20 | -1.40779 |  | LDB2 | 7.03E-13 | 1.624571 |  | PCDH15 | 0.004651 | -2.18261 |
|  | FERMT2 | 1.26E-20 | -1.57135 |  | CLEC14A | 8.32E-13 | 1.390241 |  | RXFP1 | 0.004667 | -3.48229 |
|  | RXFP1 | 1.34E-20 | -2.6012 |  | GHR | 8.37E-13 | 1.026279 |  | LOC100996760 | 0.004667 | -3.07262 |
|  | HEG1 | 1.34E-20 | -1.94107 |  | LMO7 | 1.11E-12 | 1.350909 |  | ZNF697 | 0.004667 | -1.63061 |
|  | KCNT2 | 1.34E-20 | -2.43671 |  | TSPAN7 | 1.27E-12 | 1.565438 |  | MPZL2 | 0.004767 | 1.583003 |
|  | NPNT | 1.71E-20 | -2.35685 |  | CLDN5 | 1.5E-12 | 1.722894 |  | TBX2 | 0.004864 | -2.02442 |
|  | PEAR1 | 1.78E-20 | -1.97827 |  | HBB | 1.62E-12 | 2.569901 |  | LAMA3 | 0.004934 | -2.66399 |
|  | EML1 | 1.80E-20 | -2.1036 |  | ANOS1 | 1.62E-12 | 1.716017 |  | MYLK | 0.005062 | -1.58163 |
|  | COX4I2 | 1.85E-20 | -1.9818 |  | MARCO | 1.62E-12 | 1.855945 |  | CALCRL | 0.005208 | -2.96141 |
|  | ANKRD29 | 2.02E-20 | -2.87419 |  | CPED1 | 1.71E-12 | 1.314596 |  | SUSD4 | 0.005278 | 2.307645 |
|  | SH3GL3 | 2.26E-20 | -2.18862 |  | LAMC3 | 1.78E-12 | 1.359027 |  | OR7E47P | 0.00547 | -1.72367 |
|  | COX7A1 | 2.74E-20 | -1.77129 |  | MDK | 1.79E-12 | -1.72255 |  | KIF26B | 0.005874 | 3.241446 |
|  | CD93 | 3.06E-20 | -2.08665 |  | TBX2 | 1.9E-12 | 1.442933 |  | SLIT2 | 0.005975 | -2.72247 |
|  | RHOJ | 3.90E-20 | -2.32385 |  | DPYSL2 | 2.15E-12 | 1.105963 |  | CAMK2N1 | 0.006029 | -1.85881 |
|  | PROM2 | 4.15E-20 | 3.565842 |  | TACC1 | 2.16E-12 | 1.164071 |  | CCBE1 | 0.006029 | -3.52348 |
|  | MMRN2 | 4.33E-20 | -2.00748 |  | GLIPR2 | 2.23E-12 | 1.22308 |  | TMEM74B | 0.006029 | -2.52206 |
|  | SASH1 | 4.63E-20 | -1.98269 |  | TGFBR3 | 2.23E-12 | 1.686636 |  | LOC101928307 | 0.006141 | -2.95271 |
|  | OTUD1 | 4.66E-20 | -1.85429 |  | CFD | 2.25E-12 | 1.762069 |  | SVEP1 | 0.006147 | -3.92256 |
|  | FAT3 | 4.66E-20 | -2.57109 |  | KLF4 | 2.43E-12 | 1.844521 |  | EPT1 | 0.006221 | 2.386355 |
|  | FGFR4 | 6.01E-20 | -2.50457 |  | VIPR1 | 2.59E-12 | 1.991258 |  | TTLL7 | 0.006295 | -2.12484 |
|  | LRRN3 | 8.33E-20 | -2.97251 |  | S100A4 | 2.7E-12 | 1.526719 |  | PTRF | 0.006356 | -1.85862 |
|  | FXYD6 | 8.54E-20 | -1.71685 |  | FGR | 2.71E-12 | 1.319193 |  | FERMT2 | 0.006383 | -1.72437 |
|  | COL6A6 | 8.75E-20 | -2.86846 |  | MARCKSL1 | 2.73E-12 | -1.17015 |  | SH3GL3 | 0.006383 | -3.27436 |
|  | TBX3 | 8.86E-20 | -1.99379 |  | SFTPA1 | 2.75E-12 | 2.01027 |  | LIMK1 | 0.006798 | 3.085525 |
|  | LOC285812 | 8.86E-20 | -1.9682 |  | MAMDC2 | 2.99E-12 | 2.058768 |  | TRAF3IP2-AS1 | 0.006855 | -1.60976 |
|  | INPP5A | 9.97E-20 | -1.19876 |  | SLCO2A1 | 3E-12 | 1.756362 |  | PTPRD | 0.006884 | -1.87665 |
|  | TMEM47 | 1.03E-19 | -1.82568 |  | CDCA7 | 3.42E-12 | -1.5807 |  | KLF4 | 0.006884 | -2.18712 |
|  | NOTCH4 | 1.05E-19 | -1.80355 |  | GIMAP8 | 3.52E-12 | 1.316248 |  | HEG1 | 0.006884 | -2.07616 |
|  | BNIP2 | 1.06E-19 | -1.3119 |  | CDO1 | 3.57E-12 | 1.027197 |  | ABCC3 | 0.006884 | 2.616625 |
|  | FOXF1 | 1.06E-19 | -3.07494 |  | LDLR | 4.23E-12 | 1.573088 |  | SH3BP5 | 0.00692 | -1.33476 |
|  | ARAP3 | 1.19E-19 | -1.4748 |  | PTRF | 4.59E-12 | 1.347164 |  | CCRL2 | 0.006983 | -1.73505 |
|  | PLAC9 | 1.31E-19 | -2.31307 |  | RASL12 | 5.07E-12 | 1.032732 |  | S1PR1 | 0.006983 | -2.01988 |
|  | PECAM1 | 1.42E-19 | -1.90209 |  | TMEM204 | 5.88E-12 | 1.042598 |  | RGCC | 0.006995 | -2.13918 |
|  | FMO2 | 1.55E-19 | -2.90009 |  | PODXL | 6.62E-12 | 1.034477 |  | C10orf91 | 0.007032 | 2.889323 |
|  | TNS1 | 1.56E-19 | -1.65511 |  | AFF3 | 7.37E-12 | 1.066414 |  | ACVRL1 | 0.007032 | -2.24593 |
|  | LINC00968 | 1.56E-19 | -3.10598 |  | CLEC1A | 7.91E-12 | 1.342036 |  | ABI3BP | 0.007151 | -1.944 |
|  | ARHGEF10 | 1.60E-19 | -1.56443 |  | PLLP | 9.12E-12 | 1.259475 |  | BMPR2 | 0.007286 | -1.60983 |
|  | HSPB2 | 1.60E-19 | -1.55499 |  | GLDN | 9.69E-12 | 1.421653 |  | ADCY4 | 0.007302 | -2.06119 |
|  | CLDN5 | 2.19E-19 | -2.74904 |  | CYP4B1 | 9.75E-12 | 1.778123 |  | DSCC1 | 0.007317 | -2.3893 |
|  | PPP1R14A | 2.21E-19 | -1.99684 |  | CD93 | 1.08E-11 | 1.506707 |  | SSR4 | 0.007317 | 1.634768 |
|  | ARHGEF26 | 2.31E-19 | -2.49974 |  | DACH1 | 1.32E-11 | 1.301175 |  | GPC3 | 0.007361 | -2.10085 |
|  | DENND2A | 2.41E-19 | -1.86268 |  | CYYR1 | 1.39E-11 | 1.198996 |  | SPINK1 | 0.007433 | 4.823553 |
|  | GHR | 2.44E-19 | -2.37089 |  | WFDC1 | 1.52E-11 | 1.011433 |  | GBP4 | 0.007433 | -2.34206 |
|  | VGLL3 | 2.55E-19 | -2.8384 |  | SH2D3C | 1.64E-11 | 1.217888 |  | MYL9 | 0.007433 | -1.82042 |
|  | SLC6A4 | 2.70E-19 | -5.84358 |  | SOSTDC1 | 1.69E-11 | 1.608825 |  | LINC00961 | 0.007433 | -3.12748 |
|  | PTPN21 | 2.88E-19 | -1.93346 |  | TCEAL2 | 1.72E-11 | 1.282872 |  | SEC14L1 | 0.007433 | -1.2207 |
|  | GIMAP6 | 2.92E-19 | -2.30809 |  | INMT | 2.04E-11 | 2.211293 |  | MEIS1 | 0.00745 | -2.01179 |
|  | ITGA1 | 3.37E-19 | -2.20652 |  | HPGD | 2.48E-11 | 1.617706 |  | SH3D19 | 0.007498 | -1.14833 |
|  | C10orf54 | 3.52E-19 | -1.31163 |  | PPP1R14A | 2.48E-11 | 1.252389 |  | HSPC324 | 0.007504 | -1.94588 |
|  | CD36 | 3.89E-19 | -4.37474 |  | FBLN5 | 2.77E-11 | 1.228327 |  | TIE1 | 0.007557 | -2.21487 |
|  | RECK | 3.94E-19 | -1.84175 |  | NOTCH4 | 3.04E-11 | 1.045287 |  | USP47 | 0.007557 | -1.49734 |
|  | SEPTIN8 | 4.90E-19 | -1.53544 |  | TNFRSF21 | 3.09E-11 | -1.3104 |  | SEMA3G | 0.007568 | -2.60001 |
|  | GFOD1 | 5.33E-19 | -1.7611 |  | ABI3BP | 3.12E-11 | 1.576004 |  | ERG | 0.007578 | -2.109 |
|  | TIE1 | 5.34E-19 | -2.16892 |  | CES1 | 3.29E-11 | 1.718916 |  | SLCO2A1 | 0.007578 | -2.36241 |
|  | CORO2B | 5.78E-19 | -1.90327 |  | PDK4 | 3.84E-11 | 1.869321 |  | MSRB3 | 0.007653 | -1.85704 |
|  | SEMA6A | 5.86E-19 | -2.93283 |  | ALDH2 | 3.88E-11 | 1.038182 |  | LINC00312 | 0.00773 | -2.27938 |
|  | SH3BP5 | 6.53E-19 | -1.39332 |  | NES | 3.9E-11 | 1.007294 |  | TGFBR3 | 0.007762 | -2.92423 |
|  | FIBIN | 6.54E-19 | -2.958 |  | CALCRL | 3.93E-11 | 1.433453 |  | KL | 0.00779 | -2.65091 |
|  | THBD | 6.58E-19 | -2.41394 |  | SLC6A4 | 3.93E-11 | 1.93302 |  | MCOLN3 | 0.007847 | -2.65135 |
|  | GPIHBP1 | 7.49E-19 | -3.14869 |  | H3F3B | 3.97E-11 | 1.033598 |  | ID2 | 0.007964 | -1.69099 |
|  | FEZ1 | 7.62E-19 | -1.92177 |  | AQP4 | 4.13E-11 | 2.043602 |  | TNXB | 0.007964 | -2.78713 |
|  | TAL1 | 9.79E-19 | -2.63602 |  | FEZ1 | 4.36E-11 | 1.40676 |  | EPAS1 | 0.008023 | -2.23656 |
|  | ARRB1 | 1.08E-18 | -1.51335 |  | CLIC3 | 4.83E-11 | 1.424929 |  | CCDC50 | 0.008117 | -1.78059 |
|  | ADAMTS8 | 1.10E-18 | -2.75272 |  | LRRC32 | 5.17E-11 | 1.72527 |  | HOXA4 | 0.008212 | -1.29347 |
|  | MAMDC2 | 1.13E-18 | -2.99423 |  | HBEGF | 5.9E-11 | 1.633948 |  | ITGA8 | 0.008212 | -1.95939 |
|  | EMCN | 1.23E-18 | -3.10792 |  | MYH10 | 6.11E-11 | 1.442105 |  | PPFIBP1 | 0.008212 | -1.34593 |
|  | TOP2A | 1.36E-18 | 4.316122 |  | FERMT2 | 6.2E-11 | 1.020439 |  | ZNF331 | 0.008212 | -1.63453 |
|  | LGI3 | 1.49E-18 | -2.00188 |  | ADGRL2 | 6.63E-11 | 1.139825 |  | PRF1 | 0.008212 | -2.07848 |
|  | AHNAK | 1.50E-18 | -1.55126 |  | CYBRD1 | 6.69E-11 | 1.454729 |  | LAMA4 | 0.008212 | -2.91352 |
|  | LMCD1 | 1.50E-18 | -1.6832 |  | TOX2 | 7.44E-11 | 1.212576 |  | KCTD16 | 0.008212 | -3.61479 |
|  | RWDD1 | 1.56E-18 | -1.1153 |  | HYAL2 | 8.03E-11 | 1.024895 |  | SYNPO2 | 0.008233 | -1.59888 |
|  | ABLIM3 | 1.61E-18 | -1.5125 |  | VGLL3 | 1.01E-10 | 1.086796 |  | RASIP1 | 0.008269 | -2.45214 |
|  | CCM2L | 1.84E-18 | -2.24326 |  | CGNL1 | 1.05E-10 | 1.224897 |  | C10orf67 | 0.008345 | -1.40541 |
|  | PKIG | 1.96E-18 | -1.33603 |  | GNG11 | 1.08E-10 | 1.575591 |  | TMEM47 | 0.008493 | -2.12052 |
|  | CLIC5 | 2.08E-18 | -3.22276 |  | S100A3 | 1.22E-10 | 1.250846 |  | TNS1 | 0.008493 | -1.87815 |
|  | RAI2 | 2.22E-18 | -1.79966 |  | C1orf106 | 1.29E-10 | -1.13044 |  | PKHD1L1 | 0.008493 | -3.33889 |
|  | RNF182 | 2.22E-18 | -2.82257 |  | IL1RL1 | 1.35E-10 | 1.672683 |  | ARHGEF15 | 0.008596 | -2.35777 |
|  | LTBP4 | 2.29E-18 | -1.98607 |  | LAMP3 | 1.4E-10 | 1.875175 |  | EML1 | 0.008662 | -2.11053 |
|  | DPYSL2 | 3.40E-18 | -1.30218 |  | TGFBR2 | 1.49E-10 | 1.209385 |  | FAM173B | 0.008675 | 1.179891 |
|  | FAM65A | 3.40E-18 | -1.23669 |  | TUBB3 | 1.54E-10 | -1.81235 |  | PDK4 | 0.008779 | -2.18263 |
|  | PYCR1 | 3.75E-18 | 2.102905 |  | COX7A1 | 1.54E-10 | 1.341182 |  | GATA6 | 0.008779 | -1.79131 |
|  | CAB39L | 3.78E-18 | -1.81265 |  | SFTPC | 1.95E-10 | 3.265281 |  | NKG7 | 0.008779 | -1.88299 |
|  | LHFP | 3.89E-18 | -1.72156 |  | LILRA5 | 2.08E-10 | 1.214667 |  | SMAD6 | 0.008779 | -2.73254 |
|  | TOX2 | 4.22E-18 | -2.20535 |  | PLEKHH2 | 2.09E-10 | 1.055874 |  | CA2 | 0.008949 | -2.08482 |
|  | SERINC2 | 4.29E-18 | 2.22753 |  | LMCD1 | 2.21E-10 | 1.138125 |  | YME1L1 | 0.008949 | -1.77816 |
|  | HS6ST2 | 4.36E-18 | 5.036216 |  | PSAT1 | 2.3E-10 | -1.34656 |  | SGCG | 0.008988 | -4.45901 |
|  | RAMP2 | 4.52E-18 | -2.47756 |  | SRPX | 2.3E-10 | 1.271916 |  | SULT1C4 | 0.009028 | -2.58272 |
|  | UBE2T | 5.18E-18 | 2.668765 |  | MFAP4 | 2.32E-10 | 2.075192 |  | PDE5A | 0.009028 | -2.00682 |
|  | FCN3 | 5.94E-18 | -5.0872 |  | IL18R1 | 2.6E-10 | 1.005958 |  | AQP3 | 0.009028 | 2.372535 |
|  | MYCT1 | 5.96E-18 | -2.24217 |  | PPARG | 2.87E-10 | 1.535638 |  | ASPA | 0.009028 | -2.62758 |
|  | GYPC | 5.99E-18 | -1.42266 |  | PEBP4 | 2.88E-10 | 1.622344 |  | GAB1 | 0.009028 | -1.39281 |
|  | ST6GALNAC1 | 6.01E-18 | 3.183855 |  | HIST1H2BD | 3.04E-10 | -1.27486 |  | WFDC2 | 0.009219 | 2.183524 |
|  | ABI3BP | 7.14E-18 | -2.07896 |  | SVEP1 | 3.23E-10 | 1.613889 |  | FRMD3 | 0.009291 | -2.22023 |
|  | NOSTRIN | 7.69E-18 | -2.01243 |  | ANKRD29 | 3.23E-10 | 1.170421 |  | MMP7 | 0.009293 | 4.043389 |
|  | SPRYD7 | 7.71E-18 | -1.86314 |  | LHFP | 3.35E-10 | 1.146382 |  | DACH1 | 0.009295 | -2.46101 |
|  | PPM1F | 7.74E-18 | -1.26925 |  | KLF9 | 3.42E-10 | 1.305527 |  | SEMA3F | 0.009295 | -1.51492 |
|  | SOX7 | 7.82E-18 | -3.31831 |  | TOP2A | 3.52E-10 | -1.82694 |  | ECSCR | 0.009318 | -1.91159 |
|  | TMEM204 | 7.86E-18 | -1.98062 |  | PAICS | 3.84E-10 | -1.06451 |  | PHLDB2 | 0.009318 | -1.71746 |
|  | ZNF106 | 8.42E-18 | -1.00672 |  | MMP28 | 4.04E-10 | 1.048913 |  | SYCP2L | 0.009318 | -2.34512 |
|  | ARHGEF15 | 8.74E-18 | -1.8404 |  | DKK3 | 4.12E-10 | 1.192418 |  | RNF125 | 0.009318 | -1.86745 |
|  | SYNE1 | 9.56E-18 | -1.8167 |  | COL1A1 | 4.12E-10 | -2.32964 |  | FERMT1 | 0.009318 | 1.400714 |
|  | GAB2 | 9.57E-18 | -1.28538 |  | PPP1R15A | 4.36E-10 | 1.386926 |  | GRAMD3 | 0.009376 | 1.370339 |
|  | SVEP1 | 9.81E-18 | -2.09834 |  | CSRNP1 | 4.77E-10 | 1.507361 |  | FGD5 | 0.009414 | -2.14793 |
|  | SCN4B | 1.00E-17 | -2.72878 |  | MYADM | 5.38E-10 | 1.506572 |  | FABP4 | 0.009414 | -4.73227 |
|  | AGR2 | 1.00E-17 | 2.632045 |  | P3H2 | 5.67E-10 | 1.549883 |  | FLJ34503 | 0.009414 | -4.85977 |
|  | TSPAN18 | 1.01E-17 | -1.89999 |  | TMEM47 | 6.46E-10 | 1.062423 |  | CFL2 | 0.009628 | -1.17867 |
|  | SRD5A1 | 1.03E-17 | 2.724019 |  | PLA2G1B | 6.49E-10 | 1.668167 |  | DNAH14 | 0.009629 | 1.995897 |
|  | P2RY14 | 1.03E-17 | -1.86461 |  | VSIG4 | 6.97E-10 | 1.209252 |  | RDX | 0.009695 | -1.16318 |
|  | ESAM | 1.05E-17 | -1.60086 |  | ETS2 | 7.03E-10 | 1.11167 |  | HLA-E | 0.009695 | -1.55738 |
|  | HN1L | 1.10E-17 | 1.485411 |  | ENG | 7.32E-10 | 1.118886 |  | CLIC6 | 0.009801 | 2.658519 |
|  | PEAK1 | 1.16E-17 | -1.38072 |  | NOSTRIN | 8.16E-10 | 1.262892 |  | NOVA2 | 0.009801 | -1.93661 |
|  | KANK2 | 1.24E-17 | -1.31328 |  | MMP11 | 8.38E-10 | -1.56031 |  | ADRA1A | 0.009883 | -3.042 |
|  | PTPRM | 1.42E-17 | -1.35739 |  | SULF1 | 8.46E-10 | -1.59923 |  |  |  |  |
|  | GPR146 | 1.44E-17 | -2.31539 |  | GYG2 | 8.68E-10 | -1.00973 |  |  |  |  |
|  | TBX5-AS1 | 1.50E-17 | -2.17015 |  | UBE2T | 8.72E-10 | -1.06378 |  |  |  |  |
|  | PRKCE | 1.53E-17 | -1.98394 |  | GPT2 | 9.52E-10 | -1.57128 |  |  |  |  |
|  | FENDRR | 1.56E-17 | -2.00875 |  | PROM2 | 9.72E-10 | -1.61983 |  |  |  |  |
|  | RAP1A | 1.65E-17 | -1.61197 |  | FZD4 | 1.06E-09 | 1.12906 |  |  |  |  |
|  | ZEB1 | 1.69E-17 | -1.90679 |  | RGS17 | 1.06E-09 | -1.26331 |  |  |  |  |
|  | ADGRB3 | 1.70E-17 | -1.88827 |  | HOXA5 | 1.16E-09 | 1.305724 |  |  |  |  |
|  | PKNOX2 | 1.70E-17 | -2.0408 |  | SMAD6 | 1.18E-09 | 1.639167 |  |  |  |  |
|  | GDF10 | 1.94E-17 | -2.73636 |  | CD24 | 1.25E-09 | -1.4193 |  |  |  |  |
|  | C1orf106 | 2.13E-17 | 2.532294 |  | HSPB8 | 1.35E-09 | 1.016734 |  |  |  |  |
|  | VWF | 2.14E-17 | -2.1227 |  | OLR1 | 1.4E-09 | 1.744764 |  |  |  |  |
|  | RRM2 | 2.15E-17 | 3.116831 |  | CDC20 | 1.5E-09 | -1.53748 |  |  |  |  |
|  | EPB41L5 | 2.20E-17 | -1.65697 |  | TIMP1 | 1.52E-09 | -1.42678 |  |  |  |  |
|  | CLEC14A | 2.26E-17 | -2.17601 |  | DUOX1 | 1.59E-09 | 1.179534 |  |  |  |  |
|  | KIAA0101 | 2.46E-17 | 2.999459 |  | ASPM | 1.67E-09 | -1.21369 |  |  |  |  |
|  | PRKCH | 2.57E-17 | -1.08702 |  | NDRG2 | 1.85E-09 | 1.103535 |  |  |  |  |
|  | LINC00312 | 2.77E-17 | -2.07527 |  | PDE5A | 2.22E-09 | 1.356624 |  |  |  |  |
|  | PIP5K1B | 2.95E-17 | -2.39474 |  | ARAP3 | 2.44E-09 | 1.090772 |  |  |  |  |
|  | STON1 | 2.98E-17 | -1.61784 |  | CTHRC1 | 2.47E-09 | -1.15666 |  |  |  |  |
|  | LAMC3 | 3.21E-17 | -1.73035 |  | ALOX5AP | 2.5E-09 | 1.498228 |  |  |  |  |
|  | JAM2 | 3.25E-17 | -2.48238 |  | SLC46A2 | 2.87E-09 | 1.053148 |  |  |  |  |
|  | HLA-E | 3.36E-17 | -1.35926 |  | VWF | 3.03E-09 | 1.370795 |  |  |  |  |
|  | SNCA | 3.40E-17 | -1.70838 |  | FCN1 | 3.55E-09 | 1.197732 |  |  |  |  |
|  | LRRFIP1 | 3.44E-17 | -1.56245 |  | SBK1 | 3.99E-09 | -1.32122 |  |  |  |  |
|  | CBFA2T3 | 3.58E-17 | -1.62303 |  | FAM150B | 4.2E-09 | 1.207949 |  |  |  |  |
|  | P2RY1 | 3.77E-17 | -2.18409 |  | RPL13AP17 | 4.32E-09 | 1.165331 |  |  |  |  |
|  | MCC | 3.98E-17 | -1.68364 |  | ANKRD20A1 | 4.41E-09 | 1.20287 |  |  |  |  |
|  | ACE | 4.12E-17 | -2.16238 |  | KIAA0101 | 4.64E-09 | -1.24331 |  |  |  |  |
|  | SSR4 | 4.28E-17 | 1.343468 |  | CDCA5 | 5.03E-09 | -1.2506 |  |  |  |  |
|  | PRX | 4.43E-17 | -2.00613 |  | TK1 | 5.19E-09 | -1.0188 |  |  |  |  |
|  | EPB41L2 | 4.50E-17 | -1.39884 |  | ADH1A | 5.21E-09 | 2.076892 |  |  |  |  |
|  | ADH1B | 4.70E-17 | -2.80888 |  | CAMK2N1 | 5.22E-09 | 1.370982 |  |  |  |  |
|  | FRY | 5.22E-17 | -2.04795 |  | ALOX5 | 5.28E-09 | 1.244903 |  |  |  |  |
|  | GATA2 | 5.54E-17 | -1.79188 |  | GMDS | 5.87E-09 | -1.02591 |  |  |  |  |
|  | WFDC2 | 5.67E-17 | 2.754491 |  | PLA2G4F | 6.21E-09 | 1.007929 |  |  |  |  |
|  | FGFBP2 | 5.73E-17 | -3.50517 |  | KLF6 | 6.21E-09 | 1.300897 |  |  |  |  |
|  | ACADL | 5.86E-17 | -3.02035 |  | WFS1 | 6.29E-09 | 1.046608 |  |  |  |  |
|  | SYNM | 5.86E-17 | -1.85828 |  | CPB2 | 6.71E-09 | 1.290795 |  |  |  |  |
|  | LIFR | 5.98E-17 | -2.24962 |  | MAL | 7.01E-09 | 1.149277 |  |  |  |  |
|  | FUT2 | 6.77E-17 | 2.911543 |  | GIMAP5 | 8E-09 | 1.257434 |  |  |  |  |
|  | FXYD1 | 6.77E-17 | -2.01918 |  | CRYAB | 8.4E-09 | 1.175145 |  |  |  |  |
|  | MFNG | 6.82E-17 | -1.28185 |  | ANGPT1 | 9.21E-09 | 1.063629 |  |  |  |  |
|  | LMO2 | 7.32E-17 | -1.65491 |  | C1orf162 | 9.89E-09 | 1.137569 |  |  |  |  |
|  | GALNT7 | 7.32E-17 | 1.904368 |  | CCNB2 | 1.23E-08 | -1.32707 |  |  |  |  |
|  | SLC39A8 | 7.60E-17 | -1.9761 |  | PMP22 | 1.44E-08 | 1.083512 |  |  |  |  |
|  | AFAP1L1 | 8.17E-17 | -1.96213 |  | GPER1 | 1.53E-08 | 1.331345 |  |  |  |  |
|  | SLC22A18 | 8.18E-17 | 2.188309 |  | SLC25A25 | 1.59E-08 | 1.070438 |  |  |  |  |
|  | LATS2 | 8.34E-17 | -1.38411 |  | CRABP2 | 1.62E-08 | -1.69736 |  |  |  |  |
|  | TMEM178A | 8.47E-17 | -2.26952 |  | ADGRE5 | 1.71E-08 | 1.138861 |  |  |  |  |
|  | HLX | 8.78E-17 | -1.42914 |  | SLC2A1 | 1.73E-08 | -1.37279 |  |  |  |  |
|  | CD24 | 8.81E-17 | 3.246927 |  | CACNA2D2 | 1.8E-08 | 1.194165 |  |  |  |  |
|  | HMBOX1 | 9.55E-17 | -1.11706 |  | WISP2 | 1.82E-08 | 1.015884 |  |  |  |  |
|  | CCDC102B | 9.92E-17 | -1.92034 |  | LRRK2 | 1.94E-08 | 1.121697 |  |  |  |  |
|  | PRICKLE2 | 9.99E-17 | -1.61311 |  | COL10A1 | 2.09E-08 | -1.06059 |  |  |  |  |
|  | ARHGAP31 | 1.05E-16 | -1.33257 |  | CXCL2 | 2.12E-08 | 1.74779 |  |  |  |  |
|  | BDNF | 1.13E-16 | -1.36079 |  | CDC45 | 2.15E-08 | -1.10882 |  |  |  |  |
|  | PALD1 | 1.15E-16 | -1.42637 |  | MELK | 2.16E-08 | -1.29029 |  |  |  |  |
|  | ADRB2 | 1.17E-16 | -1.79672 |  | GAS6 | 2.46E-08 | 1.051189 |  |  |  |  |
|  | ABCA6 | 1.25E-16 | -1.75072 |  | UBE2C | 2.46E-08 | -1.6879 |  |  |  |  |
|  | CLEC1A | 1.25E-16 | -2.05621 |  | CRTAC1 | 2.48E-08 | 1.423039 |  |  |  |  |
|  | OR7E47P | 1.27E-16 | -1.29436 |  | PODXL2 | 2.92E-08 | -1.04524 |  |  |  |  |
|  | TMEM45B | 1.48E-16 | 2.305662 |  | MT1M | 3.17E-08 | 2.038301 |  |  |  |  |
|  | ICAM2 | 1.52E-16 | -1.61168 |  | THBS2 | 3.29E-08 | -1.51825 |  |  |  |  |
|  | AFAP1-AS1 | 1.54E-16 | 3.610307 |  | FHL2 | 3.65E-08 | -1.28895 |  |  |  |  |
|  | CLDN18 | 1.60E-16 | -3.55291 |  | CD83 | 3.89E-08 | 1.001265 |  |  |  |  |
|  | SMAD9 | 1.67E-16 | -1.95214 |  | LEPR | 3.98E-08 | 1.219827 |  |  |  |  |
|  | GIMAP1 | 1.78E-16 | -2.11198 |  | FBXO32 | 4.42E-08 | -1.05432 |  |  |  |  |
|  | FGF2 | 1.81E-16 | -2.25834 |  | IGFBP3 | 6.02E-08 | -1.17936 |  |  |  |  |
|  | PCYOX1 | 1.84E-16 | -1.29933 |  | HMGB3 | 6.39E-08 | -1.67467 |  |  |  |  |
|  | AFF3 | 1.87E-16 | -3.05731 |  | CDH3 | 6.68E-08 | -1.244 |  |  |  |  |
|  | EFNA4 | 1.97E-16 | 2.371256 |  | FRAS1 | 6.68E-08 | 1.075331 |  |  |  |  |
|  | MAOB | 2.13E-16 | -1.61996 |  | MMP12 | 7.02E-08 | -1.75059 |  |  |  |  |
|  | NEXN | 2.18E-16 | -1.84604 |  | SPDEF | 7.65E-08 | -1.20411 |  |  |  |  |
|  | EIF1 | 2.19E-16 | -1.38235 |  | PLBD1 | 7.69E-08 | 1.002954 |  |  |  |  |
|  | CCDC50 | 2.20E-16 | -1.53383 |  | NUSAP1 | 7.71E-08 | -1.14476 |  |  |  |  |
|  | CNRIP1 | 2.22E-16 | -1.45369 |  | CELSR3 | 8.74E-08 | -1.02225 |  |  |  |  |
|  | SRPX | 2.25E-16 | -2.06223 |  | APOL3 | 9.01E-08 | 1.039207 |  |  |  |  |
|  | C1orf53 | 2.78E-16 | 2.923427 |  | PGM5 | 9.87E-08 | 1.212477 |  |  |  |  |
|  | FZD4 | 2.79E-16 | -1.57382 |  | NKD2 | 1.24E-07 | 1.219294 |  |  |  |  |
|  | ENC1 | 3.00E-16 | 2.122505 |  | SPP1 | 1.38E-07 | -2.39563 |  |  |  |  |
|  | TRPV2 | 3.00E-16 | -1.35784 |  | CXCL13 | 1.46E-07 | -1.45402 |  |  |  |  |
|  | ST6GALNAC3 | 3.04E-16 | -1.88404 |  | PTTG1 | 1.47E-07 | -1.09877 |  |  |  |  |
|  | DLC1 | 3.05E-16 | -1.98207 |  | SOCS2 | 1.5E-07 | 1.223263 |  |  |  |  |
|  | MASP1 | 3.35E-16 | -2.42521 |  | FKBP11 | 2.04E-07 | -1.07344 |  |  |  |  |
|  | AKAP12 | 3.58E-16 | -2.48764 |  | HS6ST2 | 2.07E-07 | -1.03568 |  |  |  |  |
|  | SOX17 | 3.86E-16 | -2.65006 |  | BMP2 | 2.07E-07 | 1.021077 |  |  |  |  |
|  | EPHX3 | 3.86E-16 | 2.063214 |  | GJB2 | 2.18E-07 | -1.14764 |  |  |  |  |
|  | ST14 | 3.86E-16 | 1.749717 |  | ID1 | 2.38E-07 | 1.154509 |  |  |  |  |
|  | CST1 | 3.88E-16 | 4.151541 |  | FAM110D | 2.38E-07 | 1.207775 |  |  |  |  |
|  | MCEMP1 | 3.94E-16 | -3.26841 |  | SPARCL1 | 2.56E-07 | 1.310547 |  |  |  |  |
|  | TMEM184A | 4.04E-16 | 2.030884 |  | BCHE | 2.84E-07 | 1.021403 |  |  |  |  |
|  | COMP | 4.05E-16 | 3.943128 |  | FAM83A | 2.96E-07 | -1.37091 |  |  |  |  |
|  | AGTPBP1 | 4.15E-16 | -1.31612 |  | GKN2 | 2.97E-07 | 2.170171 |  |  |  |  |
|  | S100A4 | 4.23E-16 | -1.66854 |  | S100A8 | 2.98E-07 | 1.553379 |  |  |  |  |
|  | GCNT3 | 4.32E-16 | 3.40575 |  | COL3A1 | 3.02E-07 | -1.51716 |  |  |  |  |
|  | BCHE | 4.72E-16 | -2.90579 |  | TPSAB1 | 3.19E-07 | 1.413862 |  |  |  |  |
|  | MYADM | 4.74E-16 | -1.62865 |  | HMGA1 | 3.3E-07 | -1.17449 |  |  |  |  |
|  | F2RL1 | 4.84E-16 | 2.435433 |  | LAD1 | 3.59E-07 | -1.13087 |  |  |  |  |
|  | PDE5A | 5.45E-16 | -2.29914 |  | MS4A7 | 3.88E-07 | 1.257116 |  |  |  |  |
|  | ITM2A | 5.54E-16 | -1.91826 |  | C2orf40 | 4.19E-07 | 1.227303 |  |  |  |  |
|  | IL17D | 7.05E-16 | -1.38764 |  | ZNF385B | 4.27E-07 | 1.44314 |  |  |  |  |
|  | KIF20A | 7.05E-16 | 2.678318 |  | CA2 | 4.36E-07 | 1.195938 |  |  |  |  |
|  | KLF9 | 7.07E-16 | -1.4964 |  | SIX4 | 4.9E-07 | -1.02005 |  |  |  |  |
|  | GABARAPL1 | 7.08E-16 | -1.4273 |  | ZBTB16 | 5.36E-07 | 1.004259 |  |  |  |  |
|  | MEF2A | 7.08E-16 | -1.03016 |  | COL5A2 | 6.1E-07 | -1.24779 |  |  |  |  |
|  | RBMS2 | 7.26E-16 | -1.35884 |  | AURKA | 6.17E-07 | -1.05121 |  |  |  |  |
|  | RAB8B | 7.32E-16 | -1.13992 |  | CYB5A | 6.31E-07 | 1.033628 |  |  |  |  |
|  | KIAA0040 | 7.33E-16 | -1.37388 |  | ZFP36 | 6.9E-07 | 1.440923 |  |  |  |  |
|  | LPL | 7.84E-16 | -2.41048 |  | CX3CL1 | 7.03E-07 | 1.390054 |  |  |  |  |
|  | ITIH5 | 8.21E-16 | -2.06008 |  | NDNF | 7.44E-07 | 1.299366 |  |  |  |  |
|  | PHACTR2 | 8.54E-16 | -1.29284 |  | GBP4 | 7.58E-07 | 1.067906 |  |  |  |  |
|  | PARVB | 8.55E-16 | -1.21843 |  | SCG5 | 8.17E-07 | -1.05958 |  |  |  |  |
|  | MYH10 | 8.87E-16 | -1.44209 |  | TNFSF10 | 8.77E-07 | 1.083028 |  |  |  |  |
|  | NEDD9 | 9.05E-16 | -1.51063 |  | FBP1 | 8.87E-07 | 1.205077 |  |  |  |  |
|  | WISP2 | 9.20E-16 | -2.16502 |  | ADGRF5 | 8.91E-07 | 1.003577 |  |  |  |  |
|  | LINC00702 | 9.32E-16 | -1.71717 |  | CLDN3 | 9.06E-07 | -1.02298 |  |  |  |  |
|  | PDE3B | 9.35E-16 | -1.67063 |  | AQP9 | 1.02E-06 | 1.066441 |  |  |  |  |
|  | FYN | 9.83E-16 | -1.75648 |  | EFEMP1 | 1.09E-06 | 1.261892 |  |  |  |  |
|  | SNTB2 | 1.01E-15 | -1.03106 |  | ADAMDEC1 | 1.28E-06 | -1.4358 |  |  |  |  |
|  | RNF144B | 1.09E-15 | -1.16814 |  | COL1A2 | 1.41E-06 | -1.51223 |  |  |  |  |
|  | MFAP4 | 1.10E-15 | -2.45013 |  | GADD45B | 1.46E-06 | 1.214208 |  |  |  |  |
|  | RBM17 | 1.17E-15 | -1.06915 |  | IGFBP6 | 1.53E-06 | 1.131381 |  |  |  |  |
|  | ADPRH | 1.19E-15 | -1.0724 |  | CD55 | 1.6E-06 | 1.071563 |  |  |  |  |
|  | PLEKHH2 | 1.19E-15 | -1.85995 |  | SUSD2 | 1.61E-06 | 1.586578 |  |  |  |  |
|  | MSRB3 | 1.24E-15 | -1.66591 |  | FOLR3 | 1.61E-06 | 1.013308 |  |  |  |  |
|  | PAPSS2 | 1.24E-15 | -1.55314 |  | PRC1 | 1.64E-06 | -1.0087 |  |  |  |  |
|  | ADGRL3 | 1.26E-15 | -2.23252 |  | C10orf10 | 1.65E-06 | 1.420812 |  |  |  |  |
|  | H2AFJ | 1.28E-15 | -1.442 |  | DNASE1L3 | 1.69E-06 | 1.093526 |  |  |  |  |
|  | FHL5 | 1.28E-15 | -2.91326 |  | TPPP3 | 1.76E-06 | 1.12354 |  |  |  |  |
|  | CDH13 | 1.29E-15 | -1.67705 |  | FLRT3 | 1.77E-06 | 1.222832 |  |  |  |  |
|  | ZWINT | 1.31E-15 | 2.448374 |  | ADAMTS1 | 2.11E-06 | 1.194547 |  |  |  |  |
|  | LOC400568 | 1.31E-15 | -1.12583 |  | SLPI | 2.12E-06 | 1.460815 |  |  |  |  |
|  | SEMA6D | 1.32E-15 | -2.5856 |  | PCP4 | 2.25E-06 | -1.64848 |  |  |  |  |
|  | SPDEF | 1.33E-15 | 1.840809 |  | DUSP1 | 2.25E-06 | 1.261078 |  |  |  |  |
|  | CFD | 1.34E-15 | -2.22125 |  | PITX1 | 0.000003 | -1.3923 |  |  |  |  |
|  | PLPP2 | 1.35E-15 | 3.010383 |  | FPR1 | 3.13E-06 | 1.011102 |  |  |  |  |
|  | PCDH12 | 1.40E-15 | -1.40248 |  | ABCA3 | 3.15E-06 | 1.167105 |  |  |  |  |
|  | MSI2 | 1.41E-15 | 1.129862 |  | VSIG2 | 3.32E-06 | 1.153253 |  |  |  |  |
|  | CSRNP1 | 1.42E-15 | -2.25579 |  | CD19 | 3.66E-06 | -1.25013 |  |  |  |  |
|  | NPR1 | 1.43E-15 | -1.59065 |  | GCNT3 | 3.81E-06 | -1.4009 |  |  |  |  |
|  | SH3D19 | 1.48E-15 | -1.47376 |  | KRT8 | 0.000004 | -1.05405 |  |  |  |  |
|  | SERPING1 | 1.56E-15 | -1.28831 |  | KLF2 | 4.54E-06 | 1.05011 |  |  |  |  |
|  | PDS5B | 1.58E-15 | -1.12963 |  | KRT80 | 4.54E-06 | -1.08829 |  |  |  |  |
|  | EGFL7 | 1.60E-15 | -1.28862 |  | FBLN1 | 4.61E-06 | 1.134567 |  |  |  |  |
|  | HYAL2 | 1.62E-15 | -1.55767 |  | EDN1 | 4.69E-06 | 1.142249 |  |  |  |  |
|  | BVES | 1.65E-15 | -1.14695 |  | CFB | 4.77E-06 | -1.25643 |  |  |  |  |
|  | GAS6 | 1.69E-15 | -1.37393 |  | IL6 | 5.68E-06 | 1.812464 |  |  |  |  |
|  | SLC50A1 | 1.74E-15 | 1.505541 |  | MMP9 | 6.48E-06 | -1.3335 |  |  |  |  |
|  | ARHGEF6 | 1.81E-15 | -1.14858 |  | THY1 | 7.45E-06 | -1.12245 |  |  |  |  |
|  | C14orf132 | 1.84E-15 | -1.90954 |  | COMP | 1.09E-05 | -1.12715 |  |  |  |  |
|  | HMGB3 | 1.84E-15 | 2.402359 |  | TSC22D1 | 1.12E-05 | 1.028277 |  |  |  |  |
|  | SOWAHC | 1.91E-15 | -1.15325 |  | SERPINE2 | 1.12E-05 | -1.14726 |  |  |  |  |
|  | PLPP3 | 1.93E-15 | -1.50117 |  | CPA3 | 1.14E-05 | 1.305173 |  |  |  |  |
|  | LPAR1 | 1.98E-15 | -1.26056 |  | SFTPD | 0.000012 | 1.742985 |  |  |  |  |
|  | CPED1 | 2.03E-15 | -1.65992 |  | COL11A1 | 1.34E-05 | -1.08459 |  |  |  |  |
|  | STARD8 | 2.05E-15 | -1.5912 |  | CD52 | 2.19E-05 | 1.126075 |  |  |  |  |
|  | GGCT | 2.07E-15 | 1.431835 |  | VPREB3 | 2.47E-05 | -1.00926 |  |  |  |  |
|  | XDH | 2.19E-15 | 3.059933 |  | DCN | 2.53E-05 | 1.082024 |  |  |  |  |
|  | PMP22 | 2.20E-15 | -1.31093 |  | CCL19 | 2.56E-05 | -1.10894 |  |  |  |  |
|  | TXNL1 | 2.20E-15 | -1.65733 |  | MYH11 | 3.05E-05 | 1.387689 |  |  |  |  |
|  | ABCA8 | 2.29E-15 | -2.60461 |  | ITPKA | 3.47E-05 | -1.13652 |  |  |  |  |
|  | TRHDE | 2.36E-15 | -2.14091 |  | UBD | 3.59E-05 | -1.13828 |  |  |  |  |
|  | FLI1 | 2.45E-15 | -1.63234 |  | A2M | 3.67E-05 | 1.028407 |  |  |  |  |
|  | ZEB2 | 2.47E-15 | -1.5992 |  | MT1A | 3.78E-05 | 1.065895 |  |  |  |  |
|  | ITGA8 | 2.53E-15 | -1.94471 |  | C15orf48 | 0.00004 | -1.37227 |  |  |  |  |
|  | AKT3 | 2.77E-15 | -1.34392 |  | EMP1 | 4.27E-05 | 1.013359 |  |  |  |  |
|  | ANGPT1 | 2.93E-15 | -2.22422 |  | DNAJC12 | 5.52E-05 | -1.2294 |  |  |  |  |
|  | SPG20 | 2.99E-15 | -1.40297 |  | HES6 | 5.74E-05 | -1.05856 |  |  |  |  |
|  | RSPO1 | 3.02E-15 | -1.20566 |  | FOSB | 9.92E-05 | 1.896032 |  |  |  |  |
|  | UHRF1 | 3.05E-15 | 2.96095 |  | SPINK1 | 0.0001 | -2.16852 |  |  |  |  |
|  | ERP44 | 3.05E-15 | -1.31452 |  | ALPL | 0.000105 | 1.185749 |  |  |  |  |
|  | KLF4 | 3.09E-15 | -2.57215 |  | MMP7 | 0.000116 | -1.50712 |  |  |  |  |
|  | STK39 | 3.15E-15 | 1.93747 |  | ATF3 | 0.000125 | 1.183029 |  |  |  |  |
|  | RDX | 3.21E-15 | -1.31837 |  | EEF1A2 | 0.00013 | -1.3442 |  |  |  |  |
|  | GNG11 | 3.21E-15 | -2.66888 |  | CD79A | 0.000135 | -1.30477 |  |  |  |  |
|  | BMPR2 | 3.22E-15 | -1.36056 |  | CCL2 | 0.000139 | 1.381116 |  |  |  |  |
|  | CREB3L4 | 3.41E-15 | 1.669565 |  | SOX18 | 0.000143 | 1.014843 |  |  |  |  |
|  | NRN1 | 3.48E-15 | -2.2055 |  | FOLR1 | 0.000158 | 1.013995 |  |  |  |  |
|  | CENPF | 3.55E-15 | 2.579542 |  | NTM | 0.000169 | 1.069665 |  |  |  |  |
|  | TIMP3 | 3.66E-15 | -1.68973 |  | MT2A | 0.000231 | 1.037545 |  |  |  |  |
|  | LOC101928370 | 3.82E-15 | -1.94095 |  | CLDN10 | 0.000246 | -1.11347 |  |  |  |  |
|  | HMMR | 3.86E-15 | 2.650915 |  | PTGDS | 0.000268 | 1.15529 |  |  |  |  |
|  | OLFML1 | 3.94E-15 | -1.77804 |  | SCGB1A1 | 0.000428 | 2.367989 |  |  |  |  |
|  | PAFAH1B3 | 4.10E-15 | 1.385242 |  | SCGB3A2 | 0.000436 | 1.470154 |  |  |  |  |
|  | FAM46B | 4.11E-15 | -2.16109 |  | FOS | 0.000466 | 1.190509 |  |  |  |  |
|  | MANEAL | 4.20E-15 | 2.217739 |  | SFTPB | 0.000845 | 1.332511 |  |  |  |  |
|  | ETV4 | 4.23E-15 | 1.66896 |  | PGC | 0.00106 | 1.724759 |  |  |  |  |
|  | ANO6 | 4.27E-15 | -1.08822 |  | TUBB2B | 0.00162 | -1.24221 |  |  |  |  |
|  | RASSF2 | 4.34E-15 | -1.36543 |  | MZB1 | 0.0017 | -1.12227 |  |  |  |  |
|  | TMTC1 | 4.34E-15 | -2.44221 |  | C4BPA | 0.00183 | 1.225254 |  |  |  |  |
|  | DNAJC15 | 4.34E-15 | -1.36499 |  | LCN2 | 0.00201 | -1.24752 |  |  |  |  |
|  | SDC1 | 4.53E-15 | 1.384897 |  | HBG2 | 0.00223 | 1.077739 |  |  |  |  |
|  | STX2 | 4.69E-15 | -1.00338 |  | FGL1 | 0.00241 | -1.36271 |  |  |  |  |
|  | BLACAT1 | 4.88E-15 | 2.273802 |  | KLK11 | 0.00304 | 1.174651 |  |  |  |  |
|  | PGM5 | 4.89E-15 | -2.2587 |  | S100P | 0.00739 | -1.27114 |  |  |  |  |
|  | ANLN | 4.90E-15 | 3.446893 |  |  |  |  |  |  |  |  |
|  | SFTPC | 4.98E-15 | -3.23781 |  |  |  |  |  |  |  |  |
|  | METTL7A | 5.79E-15 | -1.40382 |  |  |  |  |  |  |  |  |
|  | SLC19A3 | 5.91E-15 | -2.79865 |  |  |  |  |  |  |  |  |
|  | TUBB6 | 5.97E-15 | -1.39493 |  |  |  |  |  |  |  |  |
|  | SLC9A7 | 6.07E-15 | 1.880999 |  |  |  |  |  |  |  |  |
|  | DCC | 6.22E-15 | -1.67888 |  |  |  |  |  |  |  |  |
|  | SEPTIN10 | 6.31E-15 | -1.32592 |  |  |  |  |  |  |  |  |
|  | NTRK3 | 6.36E-15 | -1.424 |  |  |  |  |  |  |  |  |
|  | SNRK | 6.36E-15 | -1.37073 |  |  |  |  |  |  |  |  |
|  | CMKLR1 | 6.55E-15 | -1.42294 |  |  |  |  |  |  |  |  |
|  | EPHB2 | 6.64E-15 | 1.524039 |  |  |  |  |  |  |  |  |
|  | LOC101928307 | 6.82E-15 | -1.50205 |  |  |  |  |  |  |  |  |
|  | FAM122A | 6.92E-15 | -1.03814 |  |  |  |  |  |  |  |  |
|  | WIF1 | 6.95E-15 | -3.55968 |  |  |  |  |  |  |  |  |
|  | BCL2L15 | 6.95E-15 | 2.30154 |  |  |  |  |  |  |  |  |
|  | CYYR1 | 7.05E-15 | -1.89497 |  |  |  |  |  |  |  |  |
|  | FLT4 | 7.16E-15 | -1.62922 |  |  |  |  |  |  |  |  |
|  | ZDHHC14 | 7.27E-15 | -1.31093 |  |  |  |  |  |  |  |  |
|  | EHD1 | 7.34E-15 | -1.0343 |  |  |  |  |  |  |  |  |
|  | GMFG | 7.44E-15 | -1.30842 |  |  |  |  |  |  |  |  |
|  | LAMP3 | 7.56E-15 | -1.90439 |  |  |  |  |  |  |  |  |
|  | KCNMB4 | 7.62E-15 | -1.33351 |  |  |  |  |  |  |  |  |
|  | PDIA4 | 7.62E-15 | 1.450482 |  |  |  |  |  |  |  |  |
|  | SOX5 | 7.70E-15 | -1.46326 |  |  |  |  |  |  |  |  |
|  | NUSAP1 | 8.31E-15 | 2.219136 |  |  |  |  |  |  |  |  |
|  | ARHGAP29 | 8.72E-15 | -1.55385 |  |  |  |  |  |  |  |  |
|  | GSTM5 | 8.72E-15 | -1.29533 |  |  |  |  |  |  |  |  |
|  | SPX | 8.72E-15 | -1.72373 |  |  |  |  |  |  |  |  |
|  | FUT3 | 8.85E-15 | 1.850578 |  |  |  |  |  |  |  |  |
|  | MAGI2-AS3 | 9.48E-15 | -1.58508 |  |  |  |  |  |  |  |  |
|  | KIF26B | 9.48E-15 | 2.942233 |  |  |  |  |  |  |  |  |
|  | AMOTL1 | 9.51E-15 | -1.29876 |  |  |  |  |  |  |  |  |
|  | MYOC | 9.57E-15 | -1.53007 |  |  |  |  |  |  |  |  |
|  | COL13A1 | 9.57E-15 | -1.67262 |  |  |  |  |  |  |  |  |
|  | DNAJB4 | 1.02E-14 | -1.61229 |  |  |  |  |  |  |  |  |
|  | MARCO | 1.03E-14 | -2.5016 |  |  |  |  |  |  |  |  |
|  | RASGRP2 | 1.05E-14 | -1.22772 |  |  |  |  |  |  |  |  |
|  | LRRC31 | 1.08E-14 | 3.111332 |  |  |  |  |  |  |  |  |
|  | LOC105379426 | 1.08E-14 | -1.95988 |  |  |  |  |  |  |  |  |
|  | SEMA3G | 1.09E-14 | -3.14996 |  |  |  |  |  |  |  |  |
|  | SGCB | 1.11E-14 | -1.08198 |  |  |  |  |  |  |  |  |
|  | AP1M2 | 1.14E-14 | 1.07353 |  |  |  |  |  |  |  |  |
|  | LMO7 | 1.17E-14 | -2.13786 |  |  |  |  |  |  |  |  |
|  | NEDD4L | 1.19E-14 | -1.9364 |  |  |  |  |  |  |  |  |
|  | SEC14L1 | 1.20E-14 | -1.12728 |  |  |  |  |  |  |  |  |
|  | GIMAP7 | 1.20E-14 | -1.7074 |  |  |  |  |  |  |  |  |
|  | LOC729680 | 1.21E-14 | -1.94165 |  |  |  |  |  |  |  |  |
|  | ADCY4 | 1.22E-14 | -1.22615 |  |  |  |  |  |  |  |  |
|  | CDH3 | 1.29E-14 | 2.414238 |  |  |  |  |  |  |  |  |
|  | FAM150B | 1.29E-14 | -3.10196 |  |  |  |  |  |  |  |  |
|  | KCNJ8 | 1.30E-14 | -1.73444 |  |  |  |  |  |  |  |  |
|  | GJD3 | 1.39E-14 | -1.08828 |  |  |  |  |  |  |  |  |
|  | ETS1 | 1.40E-14 | -1.22824 |  |  |  |  |  |  |  |  |
|  | ZNF366 | 1.42E-14 | -1.73536 |  |  |  |  |  |  |  |  |
|  | VAPA | 1.43E-14 | -1.64362 |  |  |  |  |  |  |  |  |
|  | LAD1 | 1.54E-14 | 2.175183 |  |  |  |  |  |  |  |  |
|  | MS4A15 | 1.60E-14 | -3.01456 |  |  |  |  |  |  |  |  |
|  | TPBG | 1.63E-14 | 1.765531 |  |  |  |  |  |  |  |  |
|  | UBE2C | 1.63E-14 | 2.07347 |  |  |  |  |  |  |  |  |
|  | BUB1 | 1.63E-14 | 2.324775 |  |  |  |  |  |  |  |  |
|  | TBX5 | 1.65E-14 | -1.84928 |  |  |  |  |  |  |  |  |
|  | NLN | 1.65E-14 | 1.442044 |  |  |  |  |  |  |  |  |
|  | EOGT | 1.66E-14 | -1.41175 |  |  |  |  |  |  |  |  |
|  | GALNT18 | 1.69E-14 | -1.29401 |  |  |  |  |  |  |  |  |
|  | ADRB1 | 1.77E-14 | -3.51907 |  |  |  |  |  |  |  |  |
|  | JAM3 | 1.78E-14 | -1.36324 |  |  |  |  |  |  |  |  |
|  | NDRG2 | 1.87E-14 | -1.35609 |  |  |  |  |  |  |  |  |
|  | HPCAL1 | 1.96E-14 | -1.17071 |  |  |  |  |  |  |  |  |
|  | TSPAN7 | 1.96E-14 | -2.27004 |  |  |  |  |  |  |  |  |
|  | RBMS3 | 2.01E-14 | -1.51905 |  |  |  |  |  |  |  |  |
|  | MTA3 | 2.03E-14 | 1.055935 |  |  |  |  |  |  |  |  |
|  | LOC101929398 | 2.06E-14 | -2.04675 |  |  |  |  |  |  |  |  |
|  | BIRC5 | 2.31E-14 | 2.442796 |  |  |  |  |  |  |  |  |
|  | SEPTIN7 | 2.44E-14 | -1.05507 |  |  |  |  |  |  |  |  |
|  | KIAA1324L | 2.46E-14 | -1.6557 |  |  |  |  |  |  |  |  |
|  | RASL12 | 2.48E-14 | -1.57582 |  |  |  |  |  |  |  |  |
|  | TMOD1 | 2.50E-14 | -1.28522 |  |  |  |  |  |  |  |  |
|  | FRK | 2.51E-14 | 1.723196 |  |  |  |  |  |  |  |  |
|  | NES | 2.51E-14 | -1.45282 |  |  |  |  |  |  |  |  |
|  | DST | 2.60E-14 | -1.38712 |  |  |  |  |  |  |  |  |
|  | CACNA1D | 2.77E-14 | -1.45148 |  |  |  |  |  |  |  |  |
|  | SLC39A11 | 2.87E-14 | 1.208996 |  |  |  |  |  |  |  |  |
|  | PSAT1 | 2.95E-14 | 3.089792 |  |  |  |  |  |  |  |  |
|  | DOK6 | 3.05E-14 | -1.92918 |  |  |  |  |  |  |  |  |
|  | TGFBR2 | 3.05E-14 | -1.43275 |  |  |  |  |  |  |  |  |
|  | PDE1C | 3.05E-14 | -1.73866 |  |  |  |  |  |  |  |  |
|  | SPARCL1 | 3.08E-14 | -1.62642 |  |  |  |  |  |  |  |  |
|  | TNPO1 | 3.10E-14 | 1.339692 |  |  |  |  |  |  |  |  |
|  | RMI2 | 3.10E-14 | 1.827299 |  |  |  |  |  |  |  |  |
|  | FOXP1 | 3.11E-14 | -1.11694 |  |  |  |  |  |  |  |  |
|  | MCTS1 | 3.23E-14 | 1.167764 |  |  |  |  |  |  |  |  |
|  | CP | 3.41E-14 | 3.954236 |  |  |  |  |  |  |  |  |
|  | HKDC1 | 3.43E-14 | 2.273908 |  |  |  |  |  |  |  |  |
|  | MYL9 | 3.48E-14 | -1.53429 |  |  |  |  |  |  |  |  |
|  | TBXA2R | 3.48E-14 | -1.20571 |  |  |  |  |  |  |  |  |
|  | TTC7B | 3.64E-14 | -1.17397 |  |  |  |  |  |  |  |  |
|  | TRIM59 | 3.65E-14 | 1.851174 |  |  |  |  |  |  |  |  |
|  | CLDN12 | 4.09E-14 | 1.165018 |  |  |  |  |  |  |  |  |
|  | SGIP1 | 4.09E-14 | -1.44578 |  |  |  |  |  |  |  |  |
|  | STX3 | 4.14E-14 | -1.1661 |  |  |  |  |  |  |  |  |
|  | PIK3R1 | 4.19E-14 | -1.41562 |  |  |  |  |  |  |  |  |
|  | MACF1 | 4.20E-14 | -1.02259 |  |  |  |  |  |  |  |  |
|  | ENG | 4.29E-14 | -1.29163 |  |  |  |  |  |  |  |  |
|  | KCNK5 | 4.29E-14 | 2.401845 |  |  |  |  |  |  |  |  |
|  | MEIS1 | 4.42E-14 | -1.73417 |  |  |  |  |  |  |  |  |
|  | AOX1 | 4.56E-14 | -2.1154 |  |  |  |  |  |  |  |  |
|  | PCOLCE2 | 4.56E-14 | -2.77042 |  |  |  |  |  |  |  |  |
|  | FERMT1 | 4.65E-14 | 2.149471 |  |  |  |  |  |  |  |  |
|  | FRMD4A | 4.77E-14 | -1.33473 |  |  |  |  |  |  |  |  |
|  | EFR3B | 4.79E-14 | -1.14081 |  |  |  |  |  |  |  |  |
|  | PDE8B | 4.79E-14 | -1.84877 |  |  |  |  |  |  |  |  |
|  | PRKCB | 4.85E-14 | -1.33198 |  |  |  |  |  |  |  |  |
|  | CCNB2 | 4.94E-14 | 2.191637 |  |  |  |  |  |  |  |  |
|  | ASPM | 5.13E-14 | 2.893874 |  |  |  |  |  |  |  |  |
|  | ATOH8 | 5.18E-14 | -1.91172 |  |  |  |  |  |  |  |  |
|  | PGM2L1 | 5.30E-14 | 2.173076 |  |  |  |  |  |  |  |  |
|  | IDH2 | 5.37E-14 | 1.133635 |  |  |  |  |  |  |  |  |
|  | CDCA8 | 5.56E-14 | 1.377793 |  |  |  |  |  |  |  |  |
|  | RAPGEF4 | 5.61E-14 | -1.9884 |  |  |  |  |  |  |  |  |
|  | ERO1A | 5.68E-14 | 1.904103 |  |  |  |  |  |  |  |  |
|  | PTH1R | 6.26E-14 | -1.02686 |  |  |  |  |  |  |  |  |
|  | PLSCR4 | 6.26E-14 | -1.20651 |  |  |  |  |  |  |  |  |
|  | CDC20 | 6.26E-14 | 2.265967 |  |  |  |  |  |  |  |  |
|  | TTC28 | 6.26E-14 | -1.25195 |  |  |  |  |  |  |  |  |
|  | RHBDL2 | 6.48E-14 | 2.193212 |  |  |  |  |  |  |  |  |
|  | HSPB8 | 6.56E-14 | -1.82421 |  |  |  |  |  |  |  |  |
|  | SIDT1 | 6.66E-14 | 1.544523 |  |  |  |  |  |  |  |  |
|  | GPC3 | 6.77E-14 | -2.38294 |  |  |  |  |  |  |  |  |
|  | RADIL | 6.89E-14 | -1.04449 |  |  |  |  |  |  |  |  |
|  | TMEM88 | 7.03E-14 | -1.47598 |  |  |  |  |  |  |  |  |
|  | RRAS | 7.13E-14 | -1.58211 |  |  |  |  |  |  |  |  |
|  | CCNB1 | 7.29E-14 | 2.179272 |  |  |  |  |  |  |  |  |
|  | ADAMTS1 | 7.44E-14 | -2.27078 |  |  |  |  |  |  |  |  |
|  | TSPAN6 | 8.06E-14 | 1.57355 |  |  |  |  |  |  |  |  |
|  | GPR160 | 8.08E-14 | 1.902411 |  |  |  |  |  |  |  |  |
|  | SRPK1 | 8.37E-14 | 1.125145 |  |  |  |  |  |  |  |  |
|  | GPD1 | 8.37E-14 | -1.25329 |  |  |  |  |  |  |  |  |
|  | ELMO1 | 8.51E-14 | -1.37493 |  |  |  |  |  |  |  |  |
|  | CD300LG | 8.60E-14 | -3.35249 |  |  |  |  |  |  |  |  |
|  | SCN7A | 8.84E-14 | -2.0171 |  |  |  |  |  |  |  |  |
|  | SLC44A1 | 9.02E-14 | -1.12659 |  |  |  |  |  |  |  |  |
|  | C1orf115 | 9.30E-14 | -1.44815 |  |  |  |  |  |  |  |  |
|  | KDELR2 | 9.34E-14 | 1.444411 |  |  |  |  |  |  |  |  |
|  | MAGED1 | 9.51E-14 | 1.103691 |  |  |  |  |  |  |  |  |
|  | SGCA | 9.62E-14 | -1.16977 |  |  |  |  |  |  |  |  |
|  | ITPRIP | 9.79E-14 | -1.44012 |  |  |  |  |  |  |  |  |
|  | CENPU | 9.81E-14 | 2.286768 |  |  |  |  |  |  |  |  |
|  | SMAD7 | 9.87E-14 | -1.26963 |  |  |  |  |  |  |  |  |
|  | CFL2 | 9.89E-14 | -1.34514 |  |  |  |  |  |  |  |  |
|  | FOXO1 | 1.00E-13 | -1.26689 |  |  |  |  |  |  |  |  |
|  | GJA4 | 1.02E-13 | -1.23938 |  |  |  |  |  |  |  |  |
|  | SOSTDC1 | 1.03E-13 | -4.79295 |  |  |  |  |  |  |  |  |
|  | TMEM246 | 1.04E-13 | -1.49086 |  |  |  |  |  |  |  |  |
|  | TXNDC17 | 1.04E-13 | 1.510556 |  |  |  |  |  |  |  |  |
|  | GINS1 | 1.05E-13 | 2.617817 |  |  |  |  |  |  |  |  |
|  | TSC22D1 | 1.06E-13 | -1.04294 |  |  |  |  |  |  |  |  |
|  | FUT1 | 1.10E-13 | -1.35272 |  |  |  |  |  |  |  |  |
|  | PTGIR | 1.11E-13 | -1.03577 |  |  |  |  |  |  |  |  |
|  | PTPRD | 1.12E-13 | -1.77513 |  |  |  |  |  |  |  |  |
|  | PREX2 | 1.14E-13 | -1.73029 |  |  |  |  |  |  |  |  |
|  | PLEK2 | 1.16E-13 | 1.528438 |  |  |  |  |  |  |  |  |
|  | FAM162B | 1.16E-13 | -2.49386 |  |  |  |  |  |  |  |  |
|  | SLC52A3 | 1.20E-13 | 1.188686 |  |  |  |  |  |  |  |  |
|  | SRD5A3 | 1.26E-13 | 1.912107 |  |  |  |  |  |  |  |  |
|  | DSEL | 1.27E-13 | -1.52314 |  |  |  |  |  |  |  |  |
|  | PDGFB | 1.28E-13 | -1.40429 |  |  |  |  |  |  |  |  |
|  | CAMK2N1 | 1.30E-13 | -1.87627 |  |  |  |  |  |  |  |  |
|  | HPS3 | 1.34E-13 | 1.449285 |  |  |  |  |  |  |  |  |
|  | PLCL1 | 1.35E-13 | -1.44797 |  |  |  |  |  |  |  |  |
|  | ABHD6 | 1.43E-13 | -1.26859 |  |  |  |  |  |  |  |  |
|  | NEK2 | 1.44E-13 | 2.546883 |  |  |  |  |  |  |  |  |
|  | WFDC1 | 1.47E-13 | -1.90053 |  |  |  |  |  |  |  |  |
|  | ATIC | 1.48E-13 | 1.05429 |  |  |  |  |  |  |  |  |
|  | LOC100506098 | 1.50E-13 | 2.018597 |  |  |  |  |  |  |  |  |
|  | C1QTNF7 | 1.51E-13 | -2.09261 |  |  |  |  |  |  |  |  |
|  | ANKS1A | 1.58E-13 | -1.25012 |  |  |  |  |  |  |  |  |
|  | LOC102724611 | 1.58E-13 | -2.16546 |  |  |  |  |  |  |  |  |
|  | NPR2 | 1.58E-13 | -1.01555 |  |  |  |  |  |  |  |  |
|  | GUCY1A2 | 1.68E-13 | -1.92368 |  |  |  |  |  |  |  |  |
|  | TMEM99 | 1.68E-13 | 1.231328 |  |  |  |  |  |  |  |  |
|  | HN1 | 1.73E-13 | 1.407154 |  |  |  |  |  |  |  |  |
|  | UNC5CL | 1.73E-13 | 2.294715 |  |  |  |  |  |  |  |  |
|  | CEACAM1 | 1.74E-13 | 2.365358 |  |  |  |  |  |  |  |  |
|  | KIF11 | 1.75E-13 | 2.196047 |  |  |  |  |  |  |  |  |
|  | CCDC68 | 1.84E-13 | -1.52217 |  |  |  |  |  |  |  |  |
|  | PLEKHA6 | 1.84E-13 | 1.30797 |  |  |  |  |  |  |  |  |
|  | KLF2 | 1.84E-13 | -1.8327 |  |  |  |  |  |  |  |  |
|  | SMIM22 | 1.89E-13 | 1.455528 |  |  |  |  |  |  |  |  |
|  | PGM5-AS1 | 1.90E-13 | -1.23764 |  |  |  |  |  |  |  |  |
|  | CDK1 | 1.95E-13 | 1.641959 |  |  |  |  |  |  |  |  |
|  | ZC3H12C | 1.95E-13 | -1.13545 |  |  |  |  |  |  |  |  |
|  | MYO6 | 1.97E-13 | 1.317512 |  |  |  |  |  |  |  |  |
|  | GPX3 | 2.00E-13 | -2.03919 |  |  |  |  |  |  |  |  |
|  | CDCA7 | 2.01E-13 | 3.275409 |  |  |  |  |  |  |  |  |
|  | PARD3B | 2.04E-13 | -1.01903 |  |  |  |  |  |  |  |  |
|  | FAM199X | 2.10E-13 | 1.347713 |  |  |  |  |  |  |  |  |
|  | STIL | 2.13E-13 | 1.734088 |  |  |  |  |  |  |  |  |
|  | TBX2 | 2.18E-13 | -1.89829 |  |  |  |  |  |  |  |  |
|  | CTNNAL1 | 2.18E-13 | -1.54262 |  |  |  |  |  |  |  |  |
|  | PTGFRN | 2.26E-13 | 1.314203 |  |  |  |  |  |  |  |  |
|  | PHACTR1 | 2.27E-13 | -1.26917 |  |  |  |  |  |  |  |  |
|  | DNAH14 | 2.29E-13 | 1.767164 |  |  |  |  |  |  |  |  |
|  | IGSF9 | 2.30E-13 | 1.893142 |  |  |  |  |  |  |  |  |
|  | ARAP2 | 2.30E-13 | -1.33413 |  |  |  |  |  |  |  |  |
|  | PRDM11 | 2.32E-13 | -1.42349 |  |  |  |  |  |  |  |  |
|  | TFAP2A | 2.33E-13 | 2.789343 |  |  |  |  |  |  |  |  |
|  | CAT | 2.35E-13 | -1.33607 |  |  |  |  |  |  |  |  |
|  | ALDH18A1 | 2.35E-13 | 1.329398 |  |  |  |  |  |  |  |  |
|  | CHPT1 | 2.36E-13 | -1.21725 |  |  |  |  |  |  |  |  |
|  | OLFML2A | 2.44E-13 | -1.56257 |  |  |  |  |  |  |  |  |
|  | DOCK11 | 2.44E-13 | -1.0761 |  |  |  |  |  |  |  |  |
|  | PDZRN3 | 2.49E-13 | -1.46856 |  |  |  |  |  |  |  |  |
|  | PRDX4 | 2.56E-13 | 1.290732 |  |  |  |  |  |  |  |  |
|  | A2M | 2.59E-13 | -1.02189 |  |  |  |  |  |  |  |  |
|  | DOCK6 | 2.60E-13 | -1.07333 |  |  |  |  |  |  |  |  |
|  | KDELR3 | 2.61E-13 | 2.097411 |  |  |  |  |  |  |  |  |
|  | BUB1B | 2.61E-13 | 2.385687 |  |  |  |  |  |  |  |  |
|  | CLDN4 | 2.61E-13 | 1.767574 |  |  |  |  |  |  |  |  |
|  | NCALD | 2.65E-13 | -1.28833 |  |  |  |  |  |  |  |  |
|  | GINS2 | 2.68E-13 | 1.497424 |  |  |  |  |  |  |  |  |
|  | GDF15 | 2.72E-13 | 3.058611 |  |  |  |  |  |  |  |  |
|  | CTHRC1 | 2.74E-13 | 4.059623 |  |  |  |  |  |  |  |  |
|  | MSTO1 | 2.78E-13 | 1.094934 |  |  |  |  |  |  |  |  |
|  | ABHD11 | 2.82E-13 | 1.09305 |  |  |  |  |  |  |  |  |
|  | DLGAP5 | 2.83E-13 | 2.84124 |  |  |  |  |  |  |  |  |
|  | BAIAP2L1 | 2.85E-13 | 1.594641 |  |  |  |  |  |  |  |  |
|  | TMEM177 | 2.88E-13 | 1.495326 |  |  |  |  |  |  |  |  |
|  | EIF2AK1 | 2.99E-13 | 1.011359 |  |  |  |  |  |  |  |  |
|  | TK1 | 3.13E-13 | 1.477259 |  |  |  |  |  |  |  |  |
|  | ULK2 | 3.13E-13 | -1.06631 |  |  |  |  |  |  |  |  |
|  | PREX1 | 3.23E-13 | -1.32152 |  |  |  |  |  |  |  |  |
|  | KAZN | 3.29E-13 | -1.06057 |  |  |  |  |  |  |  |  |
|  | HCAR3 | 3.31E-13 | -2.57593 |  |  |  |  |  |  |  |  |
|  | LINC00467 | 3.40E-13 | 1.565555 |  |  |  |  |  |  |  |  |
|  | PGAP1 | 3.41E-13 | -1.51643 |  |  |  |  |  |  |  |  |
|  | XPR1 | 3.48E-13 | 1.623478 |  |  |  |  |  |  |  |  |
|  | STEAP3 | 3.51E-13 | 2.038914 |  |  |  |  |  |  |  |  |
|  | HOOK1 | 3.53E-13 | 1.387121 |  |  |  |  |  |  |  |  |
|  | CTTN | 3.67E-13 | 1.55089 |  |  |  |  |  |  |  |  |
|  | ADAMTSL4 | 3.68E-13 | -1.84112 |  |  |  |  |  |  |  |  |
|  | TTN | 3.73E-13 | -2.39241 |  |  |  |  |  |  |  |  |
|  | GBP4 | 3.73E-13 | -1.78021 |  |  |  |  |  |  |  |  |
|  | CNTN6 | 3.86E-13 | -1.68308 |  |  |  |  |  |  |  |  |
|  | NUP62CL | 4.02E-13 | 2.137358 |  |  |  |  |  |  |  |  |
|  | HMGB3P1 | 4.02E-13 | 1.586519 |  |  |  |  |  |  |  |  |
|  | GIMAP4 | 4.03E-13 | -1.59099 |  |  |  |  |  |  |  |  |
|  | ENO1 | 4.05E-13 | 1.222628 |  |  |  |  |  |  |  |  |
|  | EIF3M | 4.17E-13 | -1.18108 |  |  |  |  |  |  |  |  |
|  | UBL3 | 4.45E-13 | -1.09806 |  |  |  |  |  |  |  |  |
|  | CALCRL | 4.59E-13 | -2.36964 |  |  |  |  |  |  |  |  |
|  | RS1 | 4.62E-13 | -1.08592 |  |  |  |  |  |  |  |  |
|  | CDKN3 | 4.72E-13 | 2.217171 |  |  |  |  |  |  |  |  |
|  | WFS1 | 4.72E-13 | -1.52818 |  |  |  |  |  |  |  |  |
|  | LRCH1 | 4.75E-13 | -1.17258 |  |  |  |  |  |  |  |  |
|  | NLRC4 | 5.00E-13 | -1.51163 |  |  |  |  |  |  |  |  |
|  | TMEM100 | 5.04E-13 | -4.27389 |  |  |  |  |  |  |  |  |
|  | LINC00938 | 5.04E-13 | -1.05368 |  |  |  |  |  |  |  |  |
|  | CEP55 | 5.15E-13 | 2.298531 |  |  |  |  |  |  |  |  |
|  | ID1 | 5.20E-13 | -2.14381 |  |  |  |  |  |  |  |  |
|  | TYMS | 5.36E-13 | 2.118021 |  |  |  |  |  |  |  |  |
|  | PIK3C3 | 5.41E-13 | -1.03958 |  |  |  |  |  |  |  |  |
|  | ATP10B | 5.42E-13 | 2.559352 |  |  |  |  |  |  |  |  |
|  | SOCS2 | 5.42E-13 | -2.30259 |  |  |  |  |  |  |  |  |
|  | PAK6 | 5.81E-13 | 1.762869 |  |  |  |  |  |  |  |  |
|  | PDPN | 5.95E-13 | -1.58476 |  |  |  |  |  |  |  |  |
|  | KLF6 | 6.01E-13 | -1.4399 |  |  |  |  |  |  |  |  |
|  | SMAD6 | 6.13E-13 | -2.18928 |  |  |  |  |  |  |  |  |
|  | HELLS | 6.25E-13 | 1.706073 |  |  |  |  |  |  |  |  |
|  | ADGRD1 | 6.34E-13 | -1.78114 |  |  |  |  |  |  |  |  |
|  | TLR4 | 6.69E-13 | -1.68696 |  |  |  |  |  |  |  |  |
|  | PDK4 | 6.69E-13 | -3.0244 |  |  |  |  |  |  |  |  |
|  | PHEX | 7.03E-13 | -1.84209 |  |  |  |  |  |  |  |  |
|  | SUGCT | 7.03E-13 | 1.68154 |  |  |  |  |  |  |  |  |
|  | CPB2 | 7.22E-13 | -3.52577 |  |  |  |  |  |  |  |  |
|  | GNL1 | 7.22E-13 | -1.01303 |  |  |  |  |  |  |  |  |
|  | HACD1 | 7.28E-13 | -1.63581 |  |  |  |  |  |  |  |  |
|  | CASP12 | 7.50E-13 | -1.1335 |  |  |  |  |  |  |  |  |
|  | PALMD | 7.51E-13 | -1.80702 |  |  |  |  |  |  |  |  |
|  | TPX2 | 7.54E-13 | 2.294729 |  |  |  |  |  |  |  |  |
|  | PPP1R14B | 7.62E-13 | 1.133104 |  |  |  |  |  |  |  |  |
|  | SORD | 7.73E-13 | 1.759543 |  |  |  |  |  |  |  |  |
|  | PODXL | 7.82E-13 | -1.13226 |  |  |  |  |  |  |  |  |
|  | SAP18 | 7.82E-13 | -1.03223 |  |  |  |  |  |  |  |  |
|  | SNX1 | 7.95E-13 | -1.15791 |  |  |  |  |  |  |  |  |
|  | ANKRD22 | 7.95E-13 | 2.125779 |  |  |  |  |  |  |  |  |
|  | PDZD2 | 8.15E-13 | -2.10016 |  |  |  |  |  |  |  |  |
|  | RAB23 | 8.15E-13 | -1.36882 |  |  |  |  |  |  |  |  |
|  | HSD11B1 | 8.35E-13 | -1.28892 |  |  |  |  |  |  |  |  |
|  | HBB | 8.35E-13 | -2.45601 |  |  |  |  |  |  |  |  |
|  | LGI4 | 8.39E-13 | -1.03208 |  |  |  |  |  |  |  |  |
|  | DAPK2 | 8.70E-13 | -1.22785 |  |  |  |  |  |  |  |  |
|  | TMED3 | 8.95E-13 | 1.307449 |  |  |  |  |  |  |  |  |
|  | ATP2A2 | 9.04E-13 | 1.161113 |  |  |  |  |  |  |  |  |
|  | MT1M | 9.28E-13 | -3.77348 |  |  |  |  |  |  |  |  |
|  | SNRNP25 | 9.64E-13 | 1.019925 |  |  |  |  |  |  |  |  |
|  | NKG7 | 9.64E-13 | -2.3987 |  |  |  |  |  |  |  |  |
|  | PAICS | 9.65E-13 | 1.194144 |  |  |  |  |  |  |  |  |
|  | ARC | 9.85E-13 | -1.90167 |  |  |  |  |  |  |  |  |
|  | GJB2 | 9.95E-13 | 3.056647 |  |  |  |  |  |  |  |  |
|  | FPR2 | 1.00E-12 | -2.45153 |  |  |  |  |  |  |  |  |
|  | MAL | 1.00E-12 | -1.45998 |  |  |  |  |  |  |  |  |
|  | PNPLA6 | 1.01E-12 | -1.21821 |  |  |  |  |  |  |  |  |
|  | SAMD5 | 1.01E-12 | -1.18715 |  |  |  |  |  |  |  |  |
|  | FILIP1 | 1.02E-12 | -2.01387 |  |  |  |  |  |  |  |  |
|  | HSPC324 | 1.02E-12 | -1.65144 |  |  |  |  |  |  |  |  |
|  | PKDCC | 1.03E-12 | -1.37545 |  |  |  |  |  |  |  |  |
|  | UQCRB | 1.06E-12 | -1.05259 |  |  |  |  |  |  |  |  |
|  | CRABP2 | 1.07E-12 | 2.91083 |  |  |  |  |  |  |  |  |
|  | BCL6B | 1.07E-12 | -1.41331 |  |  |  |  |  |  |  |  |
|  | EPCAM | 1.13E-12 | 1.221501 |  |  |  |  |  |  |  |  |
|  | STAP2 | 1.14E-12 | 1.160808 |  |  |  |  |  |  |  |  |
|  | MIR3945HG | 1.15E-12 | -1.77382 |  |  |  |  |  |  |  |  |
|  | ABCA9 | 1.18E-12 | -1.61541 |  |  |  |  |  |  |  |  |
|  | KRT80 | 1.20E-12 | 2.126489 |  |  |  |  |  |  |  |  |
|  | NFASC | 1.20E-12 | -1.87808 |  |  |  |  |  |  |  |  |
|  | NME1 | 1.21E-12 | 1.679868 |  |  |  |  |  |  |  |  |
|  | LAPTM4B | 1.21E-12 | 1.484218 |  |  |  |  |  |  |  |  |
|  | PARVA | 1.21E-12 | -1.00916 |  |  |  |  |  |  |  |  |
|  | SLC5A9 | 1.24E-12 | -2.06589 |  |  |  |  |  |  |  |  |
|  | MOCS1 | 1.24E-12 | -1.01161 |  |  |  |  |  |  |  |  |
|  | LOC286191 | 1.26E-12 | -1.66693 |  |  |  |  |  |  |  |  |
|  | C2orf40 | 1.28E-12 | -2.49174 |  |  |  |  |  |  |  |  |
|  | CASKIN2 | 1.30E-12 | -1.57278 |  |  |  |  |  |  |  |  |
|  | CRTAC1 | 1.30E-12 | -1.78253 |  |  |  |  |  |  |  |  |
|  | SIK2 | 1.31E-12 | -1.13335 |  |  |  |  |  |  |  |  |
|  | ACAD8 | 1.33E-12 | 1.67999 |  |  |  |  |  |  |  |  |
|  | EHD2 | 1.46E-12 | -1.08066 |  |  |  |  |  |  |  |  |
|  | MKI67 | 1.47E-12 | 1.702019 |  |  |  |  |  |  |  |  |
|  | PRKCQ | 1.51E-12 | -1.25056 |  |  |  |  |  |  |  |  |
|  | SLC24A3 | 1.55E-12 | -1.13949 |  |  |  |  |  |  |  |  |
|  | SHROOM4 | 1.57E-12 | -1.13333 |  |  |  |  |  |  |  |  |
|  | PPARG | 1.58E-12 | -1.57278 |  |  |  |  |  |  |  |  |
|  | CNKSR2 | 1.63E-12 | -1.44175 |  |  |  |  |  |  |  |  |
|  | FAM110D | 1.66E-12 | -1.04663 |  |  |  |  |  |  |  |  |
|  | SLC41A2 | 1.69E-12 | 1.807349 |  |  |  |  |  |  |  |  |
|  | TMPRSS4 | 1.70E-12 | 2.770771 |  |  |  |  |  |  |  |  |
|  | METTL7B | 1.74E-12 | 2.182758 |  |  |  |  |  |  |  |  |
|  | KLRD1 | 1.74E-12 | -1.98404 |  |  |  |  |  |  |  |  |
|  | DNAJC18 | 1.78E-12 | -1.03329 |  |  |  |  |  |  |  |  |
|  | CKS1B | 1.78E-12 | 1.160253 |  |  |  |  |  |  |  |  |
|  | TBX4 | 1.79E-12 | -1.6906 |  |  |  |  |  |  |  |  |
|  | CLDN3 | 1.81E-12 | 1.878136 |  |  |  |  |  |  |  |  |
|  | VIPR1 | 1.83E-12 | -2.77317 |  |  |  |  |  |  |  |  |
|  | MELK | 1.92E-12 | 2.382523 |  |  |  |  |  |  |  |  |
|  | OSCAR | 1.95E-12 | -1.60552 |  |  |  |  |  |  |  |  |
|  | HJURP | 1.97E-12 | 1.47158 |  |  |  |  |  |  |  |  |
|  | UACA | 2.07E-12 | -1.68164 |  |  |  |  |  |  |  |  |
|  | C1GALT1 | 2.10E-12 | 1.512317 |  |  |  |  |  |  |  |  |
|  | HOXA4 | 2.16E-12 | -1.01834 |  |  |  |  |  |  |  |  |
|  | APOLD1 | 2.21E-12 | -2.17236 |  |  |  |  |  |  |  |  |
|  | GRASP | 2.21E-12 | -1.13701 |  |  |  |  |  |  |  |  |
|  | PODXL2 | 2.23E-12 | 1.76716 |  |  |  |  |  |  |  |  |
|  | TTK | 2.25E-12 | 2.334891 |  |  |  |  |  |  |  |  |
|  | NDRG4 | 2.32E-12 | -2.42802 |  |  |  |  |  |  |  |  |
|  | GKN2 | 2.37E-12 | -3.27814 |  |  |  |  |  |  |  |  |
|  | MDK | 2.39E-12 | 1.862271 |  |  |  |  |  |  |  |  |
|  | STYXL1 | 2.42E-12 | 1.027972 |  |  |  |  |  |  |  |  |
|  | RARRES2 | 2.42E-12 | -1.45171 |  |  |  |  |  |  |  |  |
|  | GPER1 | 2.44E-12 | -1.60277 |  |  |  |  |  |  |  |  |
|  | LGALS3BP | 2.46E-12 | 1.063522 |  |  |  |  |  |  |  |  |
|  | PTTG1 | 2.48E-12 | 1.579023 |  |  |  |  |  |  |  |  |
|  | DLL1 | 2.49E-12 | -1.38027 |  |  |  |  |  |  |  |  |
|  | STRBP | 2.52E-12 | 1.138156 |  |  |  |  |  |  |  |  |
|  | PRELP | 2.53E-12 | -1.4997 |  |  |  |  |  |  |  |  |
|  | LGR4 | 2.58E-12 | 2.87241 |  |  |  |  |  |  |  |  |
|  | DPY19L1 | 2.58E-12 | 1.942213 |  |  |  |  |  |  |  |  |
|  | RAB11A | 2.62E-12 | -1.33433 |  |  |  |  |  |  |  |  |
|  | C11orf80 | 2.66E-12 | 2.036782 |  |  |  |  |  |  |  |  |
|  | SLFN13 | 2.68E-12 | 1.99838 |  |  |  |  |  |  |  |  |
|  | AURKA | 2.76E-12 | 2.17777 |  |  |  |  |  |  |  |  |
|  | BZW2 | 2.84E-12 | 1.529024 |  |  |  |  |  |  |  |  |
|  | ID4 | 2.85E-12 | -2.00374 |  |  |  |  |  |  |  |  |
|  | RSPO2 | 2.88E-12 | -2.14548 |  |  |  |  |  |  |  |  |
|  | NPR3 | 2.89E-12 | -1.71236 |  |  |  |  |  |  |  |  |
|  | KANK4 | 2.93E-12 | -1.78419 |  |  |  |  |  |  |  |  |
|  | MAD2L1 | 2.94E-12 | 2.081584 |  |  |  |  |  |  |  |  |
|  | TRPC6 | 3.01E-12 | -1.79429 |  |  |  |  |  |  |  |  |
|  | TMEM106B | 3.02E-12 | 1.352056 |  |  |  |  |  |  |  |  |
|  | RCC1 | 3.04E-12 | 1.4431 |  |  |  |  |  |  |  |  |
|  | ARGLU1 | 3.06E-12 | -1.26283 |  |  |  |  |  |  |  |  |
|  | PPARGC1A | 3.14E-12 | -1.73919 |  |  |  |  |  |  |  |  |
|  | EBF1 | 3.14E-12 | -1.43633 |  |  |  |  |  |  |  |  |
|  | PRF1 | 3.16E-12 | -1.93701 |  |  |  |  |  |  |  |  |
|  | RAMP3 | 3.20E-12 | -2.70272 |  |  |  |  |  |  |  |  |
|  | PIGM | 3.22E-12 | 1.003492 |  |  |  |  |  |  |  |  |
|  | KIF14 | 3.24E-12 | 1.854174 |  |  |  |  |  |  |  |  |
|  | KLRF1 | 3.28E-12 | -2.52862 |  |  |  |  |  |  |  |  |
|  | SYNPO2 | 3.34E-12 | -2.10046 |  |  |  |  |  |  |  |  |
|  | CSPG4 | 3.35E-12 | -1.20888 |  |  |  |  |  |  |  |  |
|  | RSPO3 | 3.46E-12 | -1.88946 |  |  |  |  |  |  |  |  |
|  | PAIP1 | 3.51E-12 | 1.037725 |  |  |  |  |  |  |  |  |
|  | SLC51B | 3.58E-12 | -1.26946 |  |  |  |  |  |  |  |  |
|  | PRKG1 | 3.78E-12 | -1.2532 |  |  |  |  |  |  |  |  |
|  | GLIPR2 | 3.79E-12 | -1.37423 |  |  |  |  |  |  |  |  |
|  | RORA | 3.79E-12 | -1.22359 |  |  |  |  |  |  |  |  |
|  | SULT1C4 | 3.86E-12 | -2.13676 |  |  |  |  |  |  |  |  |
|  | CXCR2 | 4.00E-12 | -2.9866 |  |  |  |  |  |  |  |  |
|  | SPAG5 | 4.00E-12 | 1.67632 |  |  |  |  |  |  |  |  |
|  | SOX4 | 4.07E-12 | 1.854809 |  |  |  |  |  |  |  |  |
|  | PCDH9 | 4.16E-12 | -2.14045 |  |  |  |  |  |  |  |  |
|  | MND1 | 4.19E-12 | 1.230918 |  |  |  |  |  |  |  |  |
|  | MRC1 | 4.21E-12 | -1.68894 |  |  |  |  |  |  |  |  |
|  | NECTIN4 | 4.21E-12 | 1.658535 |  |  |  |  |  |  |  |  |
|  | C10orf67 | 4.33E-12 | -1.13042 |  |  |  |  |  |  |  |  |
|  | ADGRE5 | 4.33E-12 | -1.35809 |  |  |  |  |  |  |  |  |
|  | MCM2 | 4.35E-12 | 1.636772 |  |  |  |  |  |  |  |  |
|  | HMGCLL1 | 4.42E-12 | -1.56245 |  |  |  |  |  |  |  |  |
|  | LSR | 4.55E-12 | 1.391504 |  |  |  |  |  |  |  |  |
|  | DENND4A | 4.73E-12 | -1.29147 |  |  |  |  |  |  |  |  |
|  | PHLDB2 | 4.75E-12 | -1.41496 |  |  |  |  |  |  |  |  |
|  | GZMH | 4.77E-12 | -1.95735 |  |  |  |  |  |  |  |  |
|  | DES | 4.78E-12 | -1.92397 |  |  |  |  |  |  |  |  |
|  | DIXDC1 | 4.78E-12 | -1.25851 |  |  |  |  |  |  |  |  |
|  | B3GNT3 | 4.80E-12 | 1.257792 |  |  |  |  |  |  |  |  |
|  | FBLN5 | 4.83E-12 | -1.61655 |  |  |  |  |  |  |  |  |
|  | CLIC3 | 4.86E-12 | -2.04781 |  |  |  |  |  |  |  |  |
|  | FAXDC2 | 4.86E-12 | -1.54948 |  |  |  |  |  |  |  |  |
|  | TLCD1 | 5.07E-12 | 1.458714 |  |  |  |  |  |  |  |  |
|  | GPSM1 | 5.13E-12 | -1.16384 |  |  |  |  |  |  |  |  |
|  | LAMA3 | 5.21E-12 | -1.79113 |  |  |  |  |  |  |  |  |
|  | ABLIM1 | 5.34E-12 | -1.10345 |  |  |  |  |  |  |  |  |
|  | MUC3B | 5.39E-12 | 1.216469 |  |  |  |  |  |  |  |  |
|  | VSIG4 | 5.40E-12 | -1.85584 |  |  |  |  |  |  |  |  |
|  | ZNF331 | 5.47E-12 | -1.7988 |  |  |  |  |  |  |  |  |
|  | LOC285043 | 5.47E-12 | -1.55118 |  |  |  |  |  |  |  |  |
|  | SBK1 | 5.53E-12 | 1.695762 |  |  |  |  |  |  |  |  |
|  | TMEM64 | 5.60E-12 | -1.13978 |  |  |  |  |  |  |  |  |
|  | CETP | 5.82E-12 | -1.43979 |  |  |  |  |  |  |  |  |
|  | GAB1 | 6.03E-12 | -1.16147 |  |  |  |  |  |  |  |  |
|  | ARHGEF19 | 6.11E-12 | 1.555186 |  |  |  |  |  |  |  |  |
|  | RNF43 | 6.17E-12 | 1.632423 |  |  |  |  |  |  |  |  |
|  | CFP | 6.21E-12 | -1.53496 |  |  |  |  |  |  |  |  |
|  | MICU3 | 6.27E-12 | -1.39196 |  |  |  |  |  |  |  |  |
|  | C4orf32 | 6.27E-12 | -1.21461 |  |  |  |  |  |  |  |  |
|  | CENPK | 6.33E-12 | 1.931891 |  |  |  |  |  |  |  |  |
|  | SPAG4 | 6.33E-12 | 1.851826 |  |  |  |  |  |  |  |  |
|  | ACACB | 6.36E-12 | -1.3508 |  |  |  |  |  |  |  |  |
|  | FUT6 | 6.38E-12 | 1.467254 |  |  |  |  |  |  |  |  |
|  | PTGER4 | 6.62E-12 | -1.34757 |  |  |  |  |  |  |  |  |
|  | FGR | 6.70E-12 | -1.60772 |  |  |  |  |  |  |  |  |
|  | PEBP4 | 6.74E-12 | -2.45275 |  |  |  |  |  |  |  |  |
|  | LGALSL | 6.81E-12 | -1.57183 |  |  |  |  |  |  |  |  |
|  | EHF | 6.95E-12 | 1.66041 |  |  |  |  |  |  |  |  |
|  | RGS2 | 7.11E-12 | -1.74943 |  |  |  |  |  |  |  |  |
|  | SRPRB | 7.13E-12 | 1.041071 |  |  |  |  |  |  |  |  |
|  | ART4 | 7.32E-12 | -1.91458 |  |  |  |  |  |  |  |  |
|  | NKD2 | 7.36E-12 | -1.03571 |  |  |  |  |  |  |  |  |
|  | TIMELESS | 7.45E-12 | 1.167118 |  |  |  |  |  |  |  |  |
|  | DPEP2 | 7.60E-12 | -1.54902 |  |  |  |  |  |  |  |  |
|  | LRP4 | 7.86E-12 | -1.5658 |  |  |  |  |  |  |  |  |
|  | PPP1R15A | 8.16E-12 | -1.57473 |  |  |  |  |  |  |  |  |
|  | PABPC1L | 8.24E-12 | 1.690967 |  |  |  |  |  |  |  |  |
|  | YME1L1 | 8.63E-12 | -1.94973 |  |  |  |  |  |  |  |  |
|  | KLF13 | 8.79E-12 | -1.07335 |  |  |  |  |  |  |  |  |
|  | LINC01268 | 9.18E-12 | -1.12109 |  |  |  |  |  |  |  |  |
|  | ADAMTS15 | 9.39E-12 | -1.76595 |  |  |  |  |  |  |  |  |
|  | CDCA5 | 9.44E-12 | 1.276927 |  |  |  |  |  |  |  |  |
|  | IL6 | 9.49E-12 | -3.75343 |  |  |  |  |  |  |  |  |
|  | PPFIBP1 | 9.53E-12 | -1.25486 |  |  |  |  |  |  |  |  |
|  | LAGE3 | 9.81E-12 | 1.242042 |  |  |  |  |  |  |  |  |
|  | EFEMP1 | 9.82E-12 | -1.80985 |  |  |  |  |  |  |  |  |
|  | RGS9 | 1.05E-11 | -1.19359 |  |  |  |  |  |  |  |  |
|  | FUT8 | 1.06E-11 | 1.434711 |  |  |  |  |  |  |  |  |
|  | SLC46A2 | 1.06E-11 | -2.06746 |  |  |  |  |  |  |  |  |
|  | ADGRF1 | 1.07E-11 | 2.84659 |  |  |  |  |  |  |  |  |
|  | OGN | 1.09E-11 | -2.58412 |  |  |  |  |  |  |  |  |
|  | ACKR4 | 1.10E-11 | -2.19995 |  |  |  |  |  |  |  |  |
|  | DUS4L | 1.15E-11 | 1.037355 |  |  |  |  |  |  |  |  |
|  | SIX4 | 1.16E-11 | 2.054349 |  |  |  |  |  |  |  |  |
|  | HYLS1 | 1.16E-11 | 1.050286 |  |  |  |  |  |  |  |  |
|  | GALE | 1.16E-11 | 1.241509 |  |  |  |  |  |  |  |  |
|  | RCSD1 | 1.16E-11 | -1.034 |  |  |  |  |  |  |  |  |
|  | CXorf36 | 1.17E-11 | -1.60901 |  |  |  |  |  |  |  |  |
|  | TCEAL7 | 1.18E-11 | -1.46183 |  |  |  |  |  |  |  |  |
|  | ABCA3 | 1.19E-11 | -1.56853 |  |  |  |  |  |  |  |  |
|  | KCNK1 | 1.22E-11 | 1.876848 |  |  |  |  |  |  |  |  |
|  | FRAS1 | 1.24E-11 | -1.84376 |  |  |  |  |  |  |  |  |
|  | KIF18B | 1.25E-11 | 1.35165 |  |  |  |  |  |  |  |  |
|  | LRRC32 | 1.26E-11 | -2.00879 |  |  |  |  |  |  |  |  |
|  | UPK3B | 1.27E-11 | -4.08314 |  |  |  |  |  |  |  |  |
|  | DKK3 | 1.32E-11 | -1.33433 |  |  |  |  |  |  |  |  |
|  | CDKN1C | 1.34E-11 | -1.32506 |  |  |  |  |  |  |  |  |
|  | FBXL7 | 1.37E-11 | -1.12288 |  |  |  |  |  |  |  |  |
|  | ZHX3 | 1.38E-11 | -1.01425 |  |  |  |  |  |  |  |  |
|  | DONSON | 1.39E-11 | 1.468195 |  |  |  |  |  |  |  |  |
|  | MPDZ | 1.39E-11 | -1.22039 |  |  |  |  |  |  |  |  |
|  | PTK7 | 1.39E-11 | 1.04659 |  |  |  |  |  |  |  |  |
|  | MMP11 | 1.40E-11 | 2.515636 |  |  |  |  |  |  |  |  |
|  | SFXN1 | 1.41E-11 | 1.090925 |  |  |  |  |  |  |  |  |
|  | PID1 | 1.42E-11 | -1.47274 |  |  |  |  |  |  |  |  |
|  | PDE2A | 1.51E-11 | -1.65391 |  |  |  |  |  |  |  |  |
|  | PPBP | 1.51E-11 | -3.4786 |  |  |  |  |  |  |  |  |
|  | ABCC9 | 1.54E-11 | -1.01276 |  |  |  |  |  |  |  |  |
|  | PRC1 | 1.56E-11 | 1.678306 |  |  |  |  |  |  |  |  |
|  | SLC14A1 | 1.59E-11 | -2.79203 |  |  |  |  |  |  |  |  |
|  | BMP5 | 1.60E-11 | -1.78386 |  |  |  |  |  |  |  |  |
|  | MNDA | 1.60E-11 | -1.54221 |  |  |  |  |  |  |  |  |
|  | HYAL1 | 1.63E-11 | -2.15499 |  |  |  |  |  |  |  |  |
|  | AQP4 | 1.64E-11 | -2.33781 |  |  |  |  |  |  |  |  |
|  | RALGPS2 | 1.68E-11 | 1.303411 |  |  |  |  |  |  |  |  |
|  | ROR1 | 1.69E-11 | -1.50387 |  |  |  |  |  |  |  |  |
|  | EPB41L3 | 1.70E-11 | -1.22179 |  |  |  |  |  |  |  |  |
|  | JPH2 | 1.73E-11 | -1.04901 |  |  |  |  |  |  |  |  |
|  | TGM2 | 1.73E-11 | -1.1331 |  |  |  |  |  |  |  |  |
|  | GALNT3 | 1.74E-11 | 1.660028 |  |  |  |  |  |  |  |  |
|  | LSAMP | 1.78E-11 | -1.16873 |  |  |  |  |  |  |  |  |
|  | NXPE3 | 1.82E-11 | -1.37323 |  |  |  |  |  |  |  |  |
|  | TMC5 | 1.84E-11 | 1.729746 |  |  |  |  |  |  |  |  |
|  | PCAT6 | 1.87E-11 | 1.302524 |  |  |  |  |  |  |  |  |
|  | POLE2 | 1.88E-11 | 1.407109 |  |  |  |  |  |  |  |  |
|  | CBX7 | 1.94E-11 | -1.10969 |  |  |  |  |  |  |  |  |
|  | SH3GL2 | 1.94E-11 | -1.54221 |  |  |  |  |  |  |  |  |
|  | PROS1 | 1.95E-11 | -1.15077 |  |  |  |  |  |  |  |  |
|  | GUSB | 1.99E-11 | 1.113247 |  |  |  |  |  |  |  |  |
|  | ECE2 | 1.99E-11 | 1.110338 |  |  |  |  |  |  |  |  |
|  | LMOD1 | 2.00E-11 | -1.38538 |  |  |  |  |  |  |  |  |
|  | ZAK | 2.02E-11 | -1.11879 |  |  |  |  |  |  |  |  |
|  | KPNA2 | 2.08E-11 | 1.375934 |  |  |  |  |  |  |  |  |
|  | TRIM2 | 2.09E-11 | 1.639732 |  |  |  |  |  |  |  |  |
|  | SGPP2 | 2.15E-11 | 2.882254 |  |  |  |  |  |  |  |  |
|  | MELTF | 2.15E-11 | 1.401868 |  |  |  |  |  |  |  |  |
|  | TMEM63C | 2.16E-11 | 1.589416 |  |  |  |  |  |  |  |  |
|  | CARD16 | 2.29E-11 | -1.26934 |  |  |  |  |  |  |  |  |
|  | C4orf48 | 2.31E-11 | 1.269378 |  |  |  |  |  |  |  |  |
|  | KIAA0907 | 2.32E-11 | 1.106895 |  |  |  |  |  |  |  |  |
|  | SEL1L3 | 2.36E-11 | 1.301212 |  |  |  |  |  |  |  |  |
|  | WASIR2 | 2.37E-11 | 1.485241 |  |  |  |  |  |  |  |  |
|  | LOC100996760 | 2.37E-11 | -2.22111 |  |  |  |  |  |  |  |  |
|  | KCTD12 | 2.41E-11 | -1.10013 |  |  |  |  |  |  |  |  |
|  | SLC25A13 | 2.45E-11 | 1.300561 |  |  |  |  |  |  |  |  |
|  | FKBP1B | 2.51E-11 | -1.55625 |  |  |  |  |  |  |  |  |
|  | SLC6A16 | 2.53E-11 | -1.3413 |  |  |  |  |  |  |  |  |
|  | ADGRE1 | 2.70E-11 | -1.84019 |  |  |  |  |  |  |  |  |
|  | RNF125 | 2.79E-11 | -1.2234 |  |  |  |  |  |  |  |  |
|  | CACNA2D2 | 2.83E-11 | -1.72397 |  |  |  |  |  |  |  |  |
|  | PTPRG | 2.88E-11 | -1.27172 |  |  |  |  |  |  |  |  |
|  | SEPTIN4 | 3.07E-11 | -1.21153 |  |  |  |  |  |  |  |  |
|  | DUSP1 | 3.07E-11 | -1.45576 |  |  |  |  |  |  |  |  |
|  | DAP | 3.12E-11 | 1.290646 |  |  |  |  |  |  |  |  |
|  | PTPN5 | 3.14E-11 | -1.79874 |  |  |  |  |  |  |  |  |
|  | C8orf88 | 3.14E-11 | -1.08552 |  |  |  |  |  |  |  |  |
|  | DPT | 3.20E-11 | -1.80442 |  |  |  |  |  |  |  |  |
|  | MTURN | 3.21E-11 | -1.54425 |  |  |  |  |  |  |  |  |
|  | BMPER | 3.22E-11 | -1.63974 |  |  |  |  |  |  |  |  |
|  | FOXF2 | 3.27E-11 | -1.6464 |  |  |  |  |  |  |  |  |
|  | GPT2 | 3.27E-11 | 1.574178 |  |  |  |  |  |  |  |  |
|  | CDC42EP2 | 3.31E-11 | -1.15531 |  |  |  |  |  |  |  |  |
|  | VAMP5 | 3.31E-11 | -1.17601 |  |  |  |  |  |  |  |  |
|  | BMP6 | 3.32E-11 | -1.76888 |  |  |  |  |  |  |  |  |
|  | RAB11FIP1 | 3.40E-11 | -1.32719 |  |  |  |  |  |  |  |  |
|  | DCN | 3.44E-11 | -1.15359 |  |  |  |  |  |  |  |  |
|  | HOXA5 | 3.51E-11 | -1.93718 |  |  |  |  |  |  |  |  |
|  | SLC22A18AS | 3.52E-11 | 1.040883 |  |  |  |  |  |  |  |  |
|  | CCDC167 | 3.58E-11 | 1.009463 |  |  |  |  |  |  |  |  |
|  | ZDHHC13 | 3.60E-11 | 1.088723 |  |  |  |  |  |  |  |  |
|  | E2F8 | 3.67E-11 | 2.165857 |  |  |  |  |  |  |  |  |
|  | KLHDC7A | 3.69E-11 | 1.726697 |  |  |  |  |  |  |  |  |
|  | PAG1 | 3.74E-11 | -1.14839 |  |  |  |  |  |  |  |  |
|  | MTARC2 | 3.74E-11 | -1.0997 |  |  |  |  |  |  |  |  |
|  | B3GALNT1 | 3.76E-11 | -1.79177 |  |  |  |  |  |  |  |  |
|  | ALDH3B1 | 3.78E-11 | -1.17428 |  |  |  |  |  |  |  |  |
|  | STK32A | 3.84E-11 | 1.698875 |  |  |  |  |  |  |  |  |
|  | TMEM182 | 3.86E-11 | 1.002233 |  |  |  |  |  |  |  |  |
|  | MICALL2 | 3.91E-11 | 1.519697 |  |  |  |  |  |  |  |  |
|  | PLPP5 | 3.98E-11 | 1.428556 |  |  |  |  |  |  |  |  |
|  | SFN | 4.02E-11 | 2.659774 |  |  |  |  |  |  |  |  |
|  | CACNB2 | 4.10E-11 | -1.12027 |  |  |  |  |  |  |  |  |
|  | EZH2 | 4.12E-11 | 2.04976 |  |  |  |  |  |  |  |  |
|  | PLA2G5 | 4.23E-11 | -1.51116 |  |  |  |  |  |  |  |  |
|  | C2CD4A | 4.25E-11 | 2.625237 |  |  |  |  |  |  |  |  |
|  | NCAPG | 4.29E-11 | 1.758157 |  |  |  |  |  |  |  |  |
|  | FRMD5 | 4.32E-11 | 1.788614 |  |  |  |  |  |  |  |  |
|  | TNS2 | 4.40E-11 | -1.17227 |  |  |  |  |  |  |  |  |
|  | VEGFC | 4.48E-11 | -1.39346 |  |  |  |  |  |  |  |  |
|  | RAB25 | 4.54E-11 | 1.279266 |  |  |  |  |  |  |  |  |
|  | ATP1A2 | 4.59E-11 | -1.67571 |  |  |  |  |  |  |  |  |
|  | DDR2 | 4.66E-11 | -1.16502 |  |  |  |  |  |  |  |  |
|  | TOM1L1 | 4.73E-11 | 1.069264 |  |  |  |  |  |  |  |  |
|  | HABP2 | 4.74E-11 | 2.537759 |  |  |  |  |  |  |  |  |
|  | HBEGF | 4.75E-11 | -2.22894 |  |  |  |  |  |  |  |  |
|  | MVB12B | 4.75E-11 | -1.29436 |  |  |  |  |  |  |  |  |
|  | KCNN4 | 4.88E-11 | 2.228913 |  |  |  |  |  |  |  |  |
|  | JAML | 4.96E-11 | -1.1374 |  |  |  |  |  |  |  |  |
|  | CFLAR | 5.02E-11 | -1.28681 |  |  |  |  |  |  |  |  |
|  | FSTL3 | 5.05E-11 | -1.36447 |  |  |  |  |  |  |  |  |
|  | ANXA3 | 5.07E-11 | -1.90431 |  |  |  |  |  |  |  |  |
|  | INSC | 5.11E-11 | -1.21372 |  |  |  |  |  |  |  |  |
|  | DNASE1L3 | 5.15E-11 | -2.33651 |  |  |  |  |  |  |  |  |
|  | OPTN | 5.22E-11 | -1.05435 |  |  |  |  |  |  |  |  |
|  | TTLL7 | 5.23E-11 | -1.37854 |  |  |  |  |  |  |  |  |
|  | BICDL2 | 5.32E-11 | 1.017202 |  |  |  |  |  |  |  |  |
|  | ABCG1 | 5.33E-11 | -1.17988 |  |  |  |  |  |  |  |  |
|  | CLIC6 | 5.42E-11 | 2.828256 |  |  |  |  |  |  |  |  |
|  | GLB1L2 | 5.49E-11 | 2.090565 |  |  |  |  |  |  |  |  |
|  | TCF4 | 5.70E-11 | -1.17599 |  |  |  |  |  |  |  |  |
|  | DPP10-AS1 | 5.70E-11 | 1.370581 |  |  |  |  |  |  |  |  |
|  | ECM2 | 6.10E-11 | -1.38827 |  |  |  |  |  |  |  |  |
|  | VARS | 6.14E-11 | 1.057536 |  |  |  |  |  |  |  |  |
|  | LINC00472 | 6.22E-11 | -1.55702 |  |  |  |  |  |  |  |  |
|  | SIRPB1 | 6.28E-11 | -1.54744 |  |  |  |  |  |  |  |  |
|  | IL1RL1 | 6.31E-11 | -4.31436 |  |  |  |  |  |  |  |  |
|  | TMEM55A | 6.46E-11 | -1.1276 |  |  |  |  |  |  |  |  |
|  | GLB1L3 | 6.46E-11 | 3.343495 |  |  |  |  |  |  |  |  |
|  | JAKMIP2 | 6.58E-11 | -1.15622 |  |  |  |  |  |  |  |  |
|  | TMEM35A | 6.66E-11 | -1.44559 |  |  |  |  |  |  |  |  |
|  | BRIP1 | 6.70E-11 | 1.886324 |  |  |  |  |  |  |  |  |
|  | H2AFV | 6.70E-11 | 1.077819 |  |  |  |  |  |  |  |  |
|  | NOS1 | 6.76E-11 | -1.53012 |  |  |  |  |  |  |  |  |
|  | RNASEH2A | 6.80E-11 | 1.195731 |  |  |  |  |  |  |  |  |
|  | CDCP1 | 6.83E-11 | 1.320767 |  |  |  |  |  |  |  |  |
|  | GOLPH3L | 6.99E-11 | 1.038286 |  |  |  |  |  |  |  |  |
|  | NR4A1 | 7.01E-11 | -1.71391 |  |  |  |  |  |  |  |  |
|  | FAM101B | 7.02E-11 | -1.3555 |  |  |  |  |  |  |  |  |
|  | GGCX | 7.13E-11 | 1.432256 |  |  |  |  |  |  |  |  |
|  | MUC20 | 7.15E-11 | 2.337424 |  |  |  |  |  |  |  |  |
|  | KDM5B | 7.37E-11 | 1.011275 |  |  |  |  |  |  |  |  |
|  | MNX1 | 7.39E-11 | 1.104442 |  |  |  |  |  |  |  |  |
|  | PRDM5 | 7.48E-11 | -1.05076 |  |  |  |  |  |  |  |  |
|  | DUBR | 7.67E-11 | -1.25929 |  |  |  |  |  |  |  |  |
|  | FIGNL1 | 7.74E-11 | 1.808014 |  |  |  |  |  |  |  |  |
|  | SYNE4 | 7.77E-11 | 1.35886 |  |  |  |  |  |  |  |  |
|  | RNF157-AS1 | 7.92E-11 | 1.932276 |  |  |  |  |  |  |  |  |
|  | NHS | 8.04E-11 | 2.224084 |  |  |  |  |  |  |  |  |
|  | LAMA4 | 8.24E-11 | -1.4609 |  |  |  |  |  |  |  |  |
|  | BARD1 | 8.40E-11 | 1.047173 |  |  |  |  |  |  |  |  |
|  | MARVELD3 | 8.47E-11 | 1.164462 |  |  |  |  |  |  |  |  |
|  | C1orf21 | 8.57E-11 | -1.19851 |  |  |  |  |  |  |  |  |
|  | LRIG3 | 8.67E-11 | 2.057666 |  |  |  |  |  |  |  |  |
|  | OBFC1 | 8.73E-11 | -1.22815 |  |  |  |  |  |  |  |  |
|  | MAP3K13 | 8.95E-11 | 1.325527 |  |  |  |  |  |  |  |  |
|  | FAM13C | 8.97E-11 | -1.85755 |  |  |  |  |  |  |  |  |
|  | TMCC3 | 9.18E-11 | -1.24136 |  |  |  |  |  |  |  |  |
|  | KIF4A | 9.22E-11 | 1.989279 |  |  |  |  |  |  |  |  |
|  | TRDV3 | 9.26E-11 | -2.3461 |  |  |  |  |  |  |  |  |
|  | ALOX5 | 9.29E-11 | -1.33464 |  |  |  |  |  |  |  |  |
|  | ZFPM2 | 9.36E-11 | -1.33549 |  |  |  |  |  |  |  |  |
|  | GNLY | 9.40E-11 | -2.18623 |  |  |  |  |  |  |  |  |
|  | NUDT16L1 | 9.40E-11 | 1.007679 |  |  |  |  |  |  |  |  |
|  | ESYT2 | 9.49E-11 | 1.544157 |  |  |  |  |  |  |  |  |
|  | THBS2 | 9.62E-11 | 2.420627 |  |  |  |  |  |  |  |  |
|  | LINC00622 | 9.65E-11 | -1.99726 |  |  |  |  |  |  |  |  |
|  | HK3 | 9.84E-11 | -1.26991 |  |  |  |  |  |  |  |  |
|  | SORBS2 | 1.02E-10 | -1.93728 |  |  |  |  |  |  |  |  |
|  | HES6 | 1.03E-10 | 1.182306 |  |  |  |  |  |  |  |  |
|  | CYBRD1 | 1.03E-10 | -1.33244 |  |  |  |  |  |  |  |  |
|  | HEY1 | 1.03E-10 | -1.91778 |  |  |  |  |  |  |  |  |
|  | UBASH3B | 1.03E-10 | -1.62373 |  |  |  |  |  |  |  |  |
|  | COLGALT2 | 1.05E-10 | -1.59389 |  |  |  |  |  |  |  |  |
|  | FAM105A | 1.07E-10 | -1.24591 |  |  |  |  |  |  |  |  |
|  | DSTN | 1.10E-10 | -1.0907 |  |  |  |  |  |  |  |  |
|  | FUCA1 | 1.10E-10 | 1.386841 |  |  |  |  |  |  |  |  |
|  | VDR | 1.10E-10 | 1.131431 |  |  |  |  |  |  |  |  |
|  | EIF4E3 | 1.11E-10 | -1.00385 |  |  |  |  |  |  |  |  |
|  | GADD45B | 1.13E-10 | -1.76716 |  |  |  |  |  |  |  |  |
|  | SELP | 1.17E-10 | -1.69195 |  |  |  |  |  |  |  |  |
|  | HSPB6 | 1.21E-10 | -1.95738 |  |  |  |  |  |  |  |  |
|  | HIF3A | 1.22E-10 | -1.9853 |  |  |  |  |  |  |  |  |
|  | DIAPH2 | 1.22E-10 | -1.0101 |  |  |  |  |  |  |  |  |
|  | GSDMB | 1.22E-10 | 1.575744 |  |  |  |  |  |  |  |  |
|  | SLC2A1 | 1.22E-10 | 1.745615 |  |  |  |  |  |  |  |  |
|  | USP53 | 1.23E-10 | -1.21433 |  |  |  |  |  |  |  |  |
|  | ILDR1 | 1.23E-10 | 1.260761 |  |  |  |  |  |  |  |  |
|  | RPA3 | 1.24E-10 | 1.131606 |  |  |  |  |  |  |  |  |
|  | RAB26 | 1.26E-10 | 1.091649 |  |  |  |  |  |  |  |  |
|  | TDRKH | 1.30E-10 | 1.692682 |  |  |  |  |  |  |  |  |
|  | SLC11A1 | 1.31E-10 | -1.59241 |  |  |  |  |  |  |  |  |
|  | MIS18A | 1.35E-10 | 1.059529 |  |  |  |  |  |  |  |  |
|  | KCNQ3 | 1.35E-10 | 1.652605 |  |  |  |  |  |  |  |  |
|  | SSTR1 | 1.36E-10 | -2.51625 |  |  |  |  |  |  |  |  |
|  | SOX9 | 1.36E-10 | 2.037359 |  |  |  |  |  |  |  |  |
|  | SLC2A3 | 1.37E-10 | -1.77456 |  |  |  |  |  |  |  |  |
|  | NDST1 | 1.37E-10 | -1.03234 |  |  |  |  |  |  |  |  |
|  | CCNO | 1.41E-10 | 1.430688 |  |  |  |  |  |  |  |  |
|  | PC | 1.45E-10 | 1.177305 |  |  |  |  |  |  |  |  |
|  | IRAK1 | 1.49E-10 | 1.037518 |  |  |  |  |  |  |  |  |
|  | TINCR | 1.53E-10 | -1.21312 |  |  |  |  |  |  |  |  |
|  | COL11A1 | 1.53E-10 | 3.552234 |  |  |  |  |  |  |  |  |
|  | SPIDR | 1.54E-10 | -1.82006 |  |  |  |  |  |  |  |  |
|  | FAM49A | 1.54E-10 | -1.29833 |  |  |  |  |  |  |  |  |
|  | CAPN8 | 1.54E-10 | 2.154486 |  |  |  |  |  |  |  |  |
|  | EDNRA | 1.55E-10 | -1.28511 |  |  |  |  |  |  |  |  |
|  | SLC2A5 | 1.62E-10 | 1.534659 |  |  |  |  |  |  |  |  |
|  | SLC25A25 | 1.64E-10 | -1.31187 |  |  |  |  |  |  |  |  |
|  | PRAM1 | 1.65E-10 | -1.06427 |  |  |  |  |  |  |  |  |
|  | LOC100505938 | 1.65E-10 | 1.366999 |  |  |  |  |  |  |  |  |
|  | TMC4 | 1.65E-10 | 1.121403 |  |  |  |  |  |  |  |  |
|  | JDP2 | 1.66E-10 | -1.09761 |  |  |  |  |  |  |  |  |
|  | VSTM4 | 1.68E-10 | -1.13001 |  |  |  |  |  |  |  |  |
|  | SBSPON | 1.71E-10 | -1.01443 |  |  |  |  |  |  |  |  |
|  | SYT15 | 1.78E-10 | -1.22836 |  |  |  |  |  |  |  |  |
|  | GNG2 | 1.78E-10 | -1.21503 |  |  |  |  |  |  |  |  |
|  | TWIST2 | 1.78E-10 | -1.17374 |  |  |  |  |  |  |  |  |
|  | SCN2B | 1.79E-10 | -1.5454 |  |  |  |  |  |  |  |  |
|  | AGAP11 | 1.79E-10 | -1.0313 |  |  |  |  |  |  |  |  |
|  | ADAMTS9-AS2 | 1.82E-10 | -1.25748 |  |  |  |  |  |  |  |  |
|  | MYLK | 1.83E-10 | -1.18835 |  |  |  |  |  |  |  |  |
|  | SEZ6L2 | 1.85E-10 | 1.389583 |  |  |  |  |  |  |  |  |
|  | PPP1R16B | 1.87E-10 | -1.301 |  |  |  |  |  |  |  |  |
|  | ODAM | 1.88E-10 | -1.71922 |  |  |  |  |  |  |  |  |
|  | LONRF1 | 1.90E-10 | -1.17419 |  |  |  |  |  |  |  |  |
|  | IQGAP3 | 1.95E-10 | 1.621985 |  |  |  |  |  |  |  |  |
|  | MTX2 | 1.96E-10 | 1.085672 |  |  |  |  |  |  |  |  |
|  | ZYX | 1.98E-10 | -1.05315 |  |  |  |  |  |  |  |  |
|  | MEX3A | 2.00E-10 | 1.259642 |  |  |  |  |  |  |  |  |
|  | HHIP | 2.11E-10 | -2.7414 |  |  |  |  |  |  |  |  |
|  | NHSL2 | 2.19E-10 | -1.29227 |  |  |  |  |  |  |  |  |
|  | EFNB2 | 2.20E-10 | -1.2047 |  |  |  |  |  |  |  |  |
|  | PCDH17 | 2.21E-10 | -1.58851 |  |  |  |  |  |  |  |  |
|  | CHRDL1 | 2.23E-10 | -1.85239 |  |  |  |  |  |  |  |  |
|  | RASSF8 | 2.31E-10 | -1.26015 |  |  |  |  |  |  |  |  |
|  | SYNJ2 | 2.37E-10 | 1.59848 |  |  |  |  |  |  |  |  |
|  | BDH1 | 2.40E-10 | 1.17759 |  |  |  |  |  |  |  |  |
|  | C1orf162 | 2.41E-10 | -1.20798 |  |  |  |  |  |  |  |  |
|  | PGR | 2.46E-10 | -1.45278 |  |  |  |  |  |  |  |  |
|  | SCEL | 2.46E-10 | -1.86502 |  |  |  |  |  |  |  |  |
|  | GORAB | 2.48E-10 | 1.076562 |  |  |  |  |  |  |  |  |
|  | FAR2 | 2.48E-10 | -1.59703 |  |  |  |  |  |  |  |  |
|  | CEP41 | 2.48E-10 | 1.227971 |  |  |  |  |  |  |  |  |
|  | MS4A7 | 2.48E-10 | -1.416 |  |  |  |  |  |  |  |  |
|  | FABP5 | 2.50E-10 | -1.31182 |  |  |  |  |  |  |  |  |
|  | TFAP2C | 2.50E-10 | 1.356198 |  |  |  |  |  |  |  |  |
|  | BIK | 2.52E-10 | 1.506967 |  |  |  |  |  |  |  |  |
|  | PDCD2L | 2.57E-10 | 1.042726 |  |  |  |  |  |  |  |  |
|  | ASCC3 | 2.61E-10 | 1.128867 |  |  |  |  |  |  |  |  |
|  | MESDC1 | 2.63E-10 | -1.21367 |  |  |  |  |  |  |  |  |
|  | SHCBP1 | 2.66E-10 | 1.404806 |  |  |  |  |  |  |  |  |
|  | GLIS3 | 2.68E-10 | 1.266809 |  |  |  |  |  |  |  |  |
|  | HPRT1 | 2.70E-10 | 1.0162 |  |  |  |  |  |  |  |  |
|  | NCK1 | 2.70E-10 | -1.01111 |  |  |  |  |  |  |  |  |
|  | FLVCR1 | 2.71E-10 | 1.084974 |  |  |  |  |  |  |  |  |
|  | ADGRG6 | 2.74E-10 | -1.46385 |  |  |  |  |  |  |  |  |
|  | EPN3 | 2.77E-10 | 1.420976 |  |  |  |  |  |  |  |  |
|  | PRSS16 | 2.79E-10 | 1.06059 |  |  |  |  |  |  |  |  |
|  | RFC4 | 2.82E-10 | 1.289319 |  |  |  |  |  |  |  |  |
|  | LOC100506990 | 2.86E-10 | -1.11647 |  |  |  |  |  |  |  |  |
|  | BMP2 | 2.87E-10 | -1.86591 |  |  |  |  |  |  |  |  |
|  | FBXO16 | 2.93E-10 | 1.226439 |  |  |  |  |  |  |  |  |
|  | FUNDC1 | 2.95E-10 | 1.066115 |  |  |  |  |  |  |  |  |
|  | SAR1B | 2.96E-10 | 1.072308 |  |  |  |  |  |  |  |  |
|  | FNTB | 2.98E-10 | 1.518222 |  |  |  |  |  |  |  |  |
|  | CCNA2 | 2.99E-10 | 1.674957 |  |  |  |  |  |  |  |  |
|  | SLC44A4 | 3.00E-10 | 2.00239 |  |  |  |  |  |  |  |  |
|  | MACC1 | 3.06E-10 | 1.628726 |  |  |  |  |  |  |  |  |
|  | TMTC4 | 3.06E-10 | 1.141988 |  |  |  |  |  |  |  |  |
|  | FBXO32 | 3.06E-10 | 1.349672 |  |  |  |  |  |  |  |  |
|  | FLT1 | 3.10E-10 | -1.21018 |  |  |  |  |  |  |  |  |
|  | SULT1A2 | 3.11E-10 | -1.001 |  |  |  |  |  |  |  |  |
|  | FEN1 | 3.11E-10 | 1.110344 |  |  |  |  |  |  |  |  |
|  | NMU | 3.12E-10 | 1.680733 |  |  |  |  |  |  |  |  |
|  | CEBPD | 3.16E-10 | -2.04193 |  |  |  |  |  |  |  |  |
|  | C1orf112 | 3.18E-10 | 1.282125 |  |  |  |  |  |  |  |  |
|  | EDN1 | 3.19E-10 | -1.81162 |  |  |  |  |  |  |  |  |
|  | CRIM1 | 3.29E-10 | -1.1399 |  |  |  |  |  |  |  |  |
|  | CST2 | 3.29E-10 | 1.62401 |  |  |  |  |  |  |  |  |
|  | GJB1 | 3.36E-10 | 1.357987 |  |  |  |  |  |  |  |  |
|  | SLC38A5 | 3.41E-10 | -1.08044 |  |  |  |  |  |  |  |  |
|  | CD52 | 3.41E-10 | -1.46435 |  |  |  |  |  |  |  |  |
|  | ASF1B | 3.43E-10 | 1.235458 |  |  |  |  |  |  |  |  |
|  | KIF2C | 3.44E-10 | 1.755395 |  |  |  |  |  |  |  |  |
|  | KNL1 | 3.46E-10 | 1.621358 |  |  |  |  |  |  |  |  |
|  | FANCI | 3.49E-10 | 1.338097 |  |  |  |  |  |  |  |  |
|  | LOC100505920 | 3.56E-10 | 1.144415 |  |  |  |  |  |  |  |  |
|  | SIK1 | 3.70E-10 | -1.59347 |  |  |  |  |  |  |  |  |
|  | GALNT10 | 3.77E-10 | 1.372362 |  |  |  |  |  |  |  |  |
|  | ANP32E | 3.96E-10 | 1.620128 |  |  |  |  |  |  |  |  |
|  | LOC101927069 | 4.09E-10 | -1.08265 |  |  |  |  |  |  |  |  |
|  | FOXM1 | 4.29E-10 | 1.393047 |  |  |  |  |  |  |  |  |
|  | TSTA3 | 4.36E-10 | 1.169987 |  |  |  |  |  |  |  |  |
|  | FGF10 | 4.36E-10 | -1.05152 |  |  |  |  |  |  |  |  |
|  | C5AR1 | 4.37E-10 | -1.62706 |  |  |  |  |  |  |  |  |
|  | MSR1 | 4.47E-10 | -1.52863 |  |  |  |  |  |  |  |  |
|  | PAQR4 | 4.48E-10 | 1.030469 |  |  |  |  |  |  |  |  |
|  | WASF3 | 4.53E-10 | -1.5217 |  |  |  |  |  |  |  |  |
|  | CCDC141 | 4.55E-10 | -2.23185 |  |  |  |  |  |  |  |  |
|  | LINC01128 | 4.56E-10 | -1.02587 |  |  |  |  |  |  |  |  |
|  | DGKH | 4.57E-10 | -1.09184 |  |  |  |  |  |  |  |  |
|  | RHNO1 | 4.58E-10 | 1.176312 |  |  |  |  |  |  |  |  |
|  | TMEM159 | 4.60E-10 | 1.42895 |  |  |  |  |  |  |  |  |
|  | GYG2 | 4.66E-10 | 1.146474 |  |  |  |  |  |  |  |  |
|  | KIF16B | 4.67E-10 | 1.272924 |  |  |  |  |  |  |  |  |
|  | DOPEY2 | 4.68E-10 | 1.092336 |  |  |  |  |  |  |  |  |
|  | CA3 | 4.75E-10 | -1.94171 |  |  |  |  |  |  |  |  |
|  | SLK | 4.81E-10 | -1.03188 |  |  |  |  |  |  |  |  |
|  | RPL39L | 4.84E-10 | 1.396471 |  |  |  |  |  |  |  |  |
|  | LILRB2 | 4.99E-10 | -1.61448 |  |  |  |  |  |  |  |  |
|  | MCM8 | 5.02E-10 | 1.083758 |  |  |  |  |  |  |  |  |
|  | KCTD15 | 5.06E-10 | -1.18724 |  |  |  |  |  |  |  |  |
|  | EMP1 | 5.06E-10 | -1.71666 |  |  |  |  |  |  |  |  |
|  | ADIPOR2 | 5.32E-10 | -1.06972 |  |  |  |  |  |  |  |  |
|  | DGKE | 5.36E-10 | -1.03571 |  |  |  |  |  |  |  |  |
|  | ABCB6 | 5.37E-10 | 1.037198 |  |  |  |  |  |  |  |  |
|  | CLPTM1L | 5.40E-10 | 1.186482 |  |  |  |  |  |  |  |  |
|  | LOC107985971 | 5.41E-10 | 1.643706 |  |  |  |  |  |  |  |  |
|  | NR4A2 | 5.49E-10 | -2.06576 |  |  |  |  |  |  |  |  |
|  | GRHL1 | 5.54E-10 | 2.20608 |  |  |  |  |  |  |  |  |
|  | RMST | 5.70E-10 | -1.90177 |  |  |  |  |  |  |  |  |
|  | SSFA2 | 5.74E-10 | -1.03731 |  |  |  |  |  |  |  |  |
|  | NEK6 | 5.78E-10 | 1.102812 |  |  |  |  |  |  |  |  |
|  | GINS4 | 6.06E-10 | 1.105203 |  |  |  |  |  |  |  |  |
|  | IL18R1 | 6.18E-10 | -2.23723 |  |  |  |  |  |  |  |  |
|  | BACH2 | 6.25E-10 | -1.08107 |  |  |  |  |  |  |  |  |
|  | APOL3 | 6.30E-10 | -1.27443 |  |  |  |  |  |  |  |  |
|  | CST4 | 6.57E-10 | 1.739577 |  |  |  |  |  |  |  |  |
|  | PTPRD-AS1 | 6.77E-10 | -1.10793 |  |  |  |  |  |  |  |  |
|  | KCTD1 | 6.79E-10 | 1.223706 |  |  |  |  |  |  |  |  |
|  | ARL13B | 6.93E-10 | -1.02282 |  |  |  |  |  |  |  |  |
|  | ARL6 | 7.07E-10 | -1.10769 |  |  |  |  |  |  |  |  |
|  | PPAT | 7.07E-10 | 1.124383 |  |  |  |  |  |  |  |  |
|  | RALY-AS1 | 7.12E-10 | 1.022763 |  |  |  |  |  |  |  |  |
|  | BDH2 | 7.12E-10 | -1.05328 |  |  |  |  |  |  |  |  |
|  | STYK1 | 7.14E-10 | 1.574117 |  |  |  |  |  |  |  |  |
|  | NDC1 | 7.36E-10 | 1.142688 |  |  |  |  |  |  |  |  |
|  | C7 | 7.40E-10 | -1.67935 |  |  |  |  |  |  |  |  |
|  | GPRC5A | 7.52E-10 | -1.4595 |  |  |  |  |  |  |  |  |
|  | SPN | 7.90E-10 | -1.10913 |  |  |  |  |  |  |  |  |
|  | PTGES | 7.97E-10 | 1.435255 |  |  |  |  |  |  |  |  |
|  | NGEF | 8.06E-10 | 1.611587 |  |  |  |  |  |  |  |  |
|  | GMDS | 8.18E-10 | 1.393082 |  |  |  |  |  |  |  |  |
|  | HECW2 | 8.44E-10 | -2.09109 |  |  |  |  |  |  |  |  |
|  | VEPH1 | 8.57E-10 | -1.81524 |  |  |  |  |  |  |  |  |
|  | FGD6 | 8.59E-10 | 1.102771 |  |  |  |  |  |  |  |  |
|  | DKK2 | 8.59E-10 | -2.35771 |  |  |  |  |  |  |  |  |
|  | ITGA5 | 8.90E-10 | -1.17828 |  |  |  |  |  |  |  |  |
|  | COL1A1 | 8.96E-10 | 2.904023 |  |  |  |  |  |  |  |  |
|  | RPL23AP32 | 9.27E-10 | -1.16775 |  |  |  |  |  |  |  |  |
|  | TMEM92 | 9.32E-10 | 1.049452 |  |  |  |  |  |  |  |  |
|  | HIST1H4J | 9.32E-10 | 1.207786 |  |  |  |  |  |  |  |  |
|  | TSPAN12 | 9.35E-10 | -1.4167 |  |  |  |  |  |  |  |  |
|  | FBLN1 | 9.70E-10 | -1.42238 |  |  |  |  |  |  |  |  |
|  | NDNF | 9.72E-10 | -1.45324 |  |  |  |  |  |  |  |  |
|  | SLC7A7 | 9.90E-10 | -1.11391 |  |  |  |  |  |  |  |  |
|  | GPR4 | 9.91E-10 | -1.30163 |  |  |  |  |  |  |  |  |
|  | SLC31A2 | 1.02E-09 | -1.09892 |  |  |  |  |  |  |  |  |
|  | CDCA3 | 1.04E-09 | 1.251223 |  |  |  |  |  |  |  |  |
|  | AVPI1 | 1.06E-09 | -1.00513 |  |  |  |  |  |  |  |  |
|  | ID2 | 1.07E-09 | -1.05762 |  |  |  |  |  |  |  |  |
|  | GMNN | 1.09E-09 | 1.508188 |  |  |  |  |  |  |  |  |
|  | DZIP1 | 1.10E-09 | -1.39602 |  |  |  |  |  |  |  |  |
|  | KNTC1 | 1.10E-09 | 1.213375 |  |  |  |  |  |  |  |  |
|  | CENPE | 1.12E-09 | 1.296036 |  |  |  |  |  |  |  |  |
|  | MAP7D2 | 1.15E-09 | 1.745329 |  |  |  |  |  |  |  |  |
|  | LINC01207 | 1.16E-09 | 2.619468 |  |  |  |  |  |  |  |  |
|  | S1PR5 | 1.16E-09 | -1.21508 |  |  |  |  |  |  |  |  |
|  | SLC1A4 | 1.17E-09 | 1.252413 |  |  |  |  |  |  |  |  |
|  | UGT8 | 1.19E-09 | 1.830361 |  |  |  |  |  |  |  |  |
|  | RXRG | 1.21E-09 | -1.03648 |  |  |  |  |  |  |  |  |
|  | ZDHHC9 | 1.23E-09 | 1.639403 |  |  |  |  |  |  |  |  |
|  | IKZF2 | 1.26E-09 | 1.050257 |  |  |  |  |  |  |  |  |
|  | C10orf128 | 1.27E-09 | -1.11269 |  |  |  |  |  |  |  |  |
|  | NCAPG2 | 1.27E-09 | 1.164076 |  |  |  |  |  |  |  |  |
|  | PRIMA1 | 1.30E-09 | -1.00465 |  |  |  |  |  |  |  |  |
|  | EMB | 1.30E-09 | 1.329052 |  |  |  |  |  |  |  |  |
|  | DEPDC1 | 1.33E-09 | 1.716773 |  |  |  |  |  |  |  |  |
|  | FAM171A1 | 1.33E-09 | -1.06001 |  |  |  |  |  |  |  |  |
|  | DOK5 | 1.35E-09 | 2.054236 |  |  |  |  |  |  |  |  |
|  | ACP6 | 1.35E-09 | 1.13941 |  |  |  |  |  |  |  |  |
|  | NUP210 | 1.35E-09 | 1.12381 |  |  |  |  |  |  |  |  |
|  | ID3 | 1.35E-09 | -1.56942 |  |  |  |  |  |  |  |  |
|  | CLEC12A | 1.35E-09 | -1.72968 |  |  |  |  |  |  |  |  |
|  | NEGR1 | 1.35E-09 | -1.69802 |  |  |  |  |  |  |  |  |
|  | ELF3 | 1.36E-09 | 1.631861 |  |  |  |  |  |  |  |  |
|  | AURKB | 1.37E-09 | 1.26722 |  |  |  |  |  |  |  |  |
|  | CASS4 | 1.39E-09 | -1.74893 |  |  |  |  |  |  |  |  |
|  | PLEKHA8 | 1.43E-09 | 1.308093 |  |  |  |  |  |  |  |  |
|  | SPNS2 | 1.49E-09 | -1.03314 |  |  |  |  |  |  |  |  |
|  | C11orf21 | 1.49E-09 | -1.01074 |  |  |  |  |  |  |  |  |
|  | ZNF423 | 1.55E-09 | -1.38219 |  |  |  |  |  |  |  |  |
|  | PDK1 | 1.55E-09 | 1.164775 |  |  |  |  |  |  |  |  |
|  | SDSL | 1.55E-09 | 1.013174 |  |  |  |  |  |  |  |  |
|  | GPR161 | 1.59E-09 | -1.03727 |  |  |  |  |  |  |  |  |
|  | ECT2 | 1.60E-09 | 1.553791 |  |  |  |  |  |  |  |  |
|  | KIT | 1.62E-09 | -1.19824 |  |  |  |  |  |  |  |  |
|  | MESP1 | 1.63E-09 | 1.520907 |  |  |  |  |  |  |  |  |
|  | C1QTNF2 | 1.70E-09 | -1.21765 |  |  |  |  |  |  |  |  |
|  | BICDL1 | 1.73E-09 | 1.073488 |  |  |  |  |  |  |  |  |
|  | DUOX1 | 1.74E-09 | -2.01079 |  |  |  |  |  |  |  |  |
|  | PRKAR2B | 1.75E-09 | -1.33512 |  |  |  |  |  |  |  |  |
|  | RUNX1T1 | 1.80E-09 | -1.56515 |  |  |  |  |  |  |  |  |
|  | SFTA1P | 1.80E-09 | -1.68092 |  |  |  |  |  |  |  |  |
|  | OSR1 | 1.80E-09 | -1.47083 |  |  |  |  |  |  |  |  |
|  | FCGR3B | 1.83E-09 | -1.76436 |  |  |  |  |  |  |  |  |
|  | SAMD4A | 1.90E-09 | -1.24535 |  |  |  |  |  |  |  |  |
|  | NAP1L5 | 1.90E-09 | -1.2222 |  |  |  |  |  |  |  |  |
|  | FAM43A | 1.92E-09 | -1.46298 |  |  |  |  |  |  |  |  |
|  | MFAP3L | 1.96E-09 | -2.04157 |  |  |  |  |  |  |  |  |
|  | TLR8 | 1.98E-09 | -1.42629 |  |  |  |  |  |  |  |  |
|  | CST7 | 2.01E-09 | -1.26715 |  |  |  |  |  |  |  |  |
|  | TMEM108 | 2.03E-09 | -1.28984 |  |  |  |  |  |  |  |  |
|  | S100A12 | 2.07E-09 | -3.10186 |  |  |  |  |  |  |  |  |
|  | FAM83A | 2.10E-09 | 1.154218 |  |  |  |  |  |  |  |  |
|  | LBH | 2.11E-09 | -1.10354 |  |  |  |  |  |  |  |  |
|  | KRT4 | 2.11E-09 | -2.07344 |  |  |  |  |  |  |  |  |
|  | DEPTOR | 2.13E-09 | 2.066438 |  |  |  |  |  |  |  |  |
|  | GREM1 | 2.15E-09 | 3.348274 |  |  |  |  |  |  |  |  |
|  | CD55 | 2.15E-09 | -1.09994 |  |  |  |  |  |  |  |  |
|  | KIAA1217 | 2.17E-09 | 1.242157 |  |  |  |  |  |  |  |  |
|  | AIF1L | 2.27E-09 | -1.1902 |  |  |  |  |  |  |  |  |
|  | CLDN1 | 2.30E-09 | 2.240428 |  |  |  |  |  |  |  |  |
|  | ANXA1 | 2.32E-09 | -1.01216 |  |  |  |  |  |  |  |  |
|  | C11orf96 | 2.35E-09 | -1.68961 |  |  |  |  |  |  |  |  |
|  | IL33 | 2.36E-09 | -1.98456 |  |  |  |  |  |  |  |  |
|  | SGCE | 2.36E-09 | -1.3372 |  |  |  |  |  |  |  |  |
|  | SLC16A5 | 2.42E-09 | -1.03933 |  |  |  |  |  |  |  |  |
|  | CENPL | 2.43E-09 | 1.18091 |  |  |  |  |  |  |  |  |
|  | LRRC36 | 2.44E-09 | -1.74302 |  |  |  |  |  |  |  |  |
|  | GFPT1 | 2.45E-09 | 1.060971 |  |  |  |  |  |  |  |  |
|  | MMP12 | 2.60E-09 | 3.046738 |  |  |  |  |  |  |  |  |
|  | ITGA11 | 2.63E-09 | 1.251186 |  |  |  |  |  |  |  |  |
|  | LACTB2 | 2.64E-09 | 1.155231 |  |  |  |  |  |  |  |  |
|  | SORBS1 | 2.64E-09 | -1.49004 |  |  |  |  |  |  |  |  |
|  | PCBD2 | 2.70E-09 | 1.019943 |  |  |  |  |  |  |  |  |
|  | EIF3F | 2.71E-09 | -1.04749 |  |  |  |  |  |  |  |  |
|  | NCAPH | 2.72E-09 | 1.039719 |  |  |  |  |  |  |  |  |
|  | KNOP1 | 2.76E-09 | 1.162181 |  |  |  |  |  |  |  |  |
|  | BEAN1 | 2.77E-09 | 1.57914 |  |  |  |  |  |  |  |  |
|  | BCL2L14 | 2.81E-09 | 1.141708 |  |  |  |  |  |  |  |  |
|  | SLC30A9 | 2.82E-09 | 1.267099 |  |  |  |  |  |  |  |  |
|  | GPA33 | 2.82E-09 | -1.42342 |  |  |  |  |  |  |  |  |
|  | SCARA3 | 2.84E-09 | -1.26716 |  |  |  |  |  |  |  |  |
|  | NHSL1 | 2.90E-09 | -1.32164 |  |  |  |  |  |  |  |  |
|  | SCAI | 2.91E-09 | -1.25407 |  |  |  |  |  |  |  |  |
|  | NCF2 | 2.98E-09 | -1.12301 |  |  |  |  |  |  |  |  |
|  | PILRA | 3.00E-09 | -1.12794 |  |  |  |  |  |  |  |  |
|  | GAS1 | 3.00E-09 | -1.65415 |  |  |  |  |  |  |  |  |
|  | PLCB4 | 3.00E-09 | -1.7565 |  |  |  |  |  |  |  |  |
|  | MMP7 | 3.14E-09 | 2.75041 |  |  |  |  |  |  |  |  |
|  | S100A3 | 3.18E-09 | -2.07224 |  |  |  |  |  |  |  |  |
|  | DOCK9 | 3.20E-09 | -1.00326 |  |  |  |  |  |  |  |  |
|  | ZBTB16 | 3.25E-09 | -2.69524 |  |  |  |  |  |  |  |  |
|  | TBC1D8B | 3.26E-09 | 1.088974 |  |  |  |  |  |  |  |  |
|  | CDC6 | 3.26E-09 | 1.480112 |  |  |  |  |  |  |  |  |
|  | FMO3 | 3.26E-09 | -1.19445 |  |  |  |  |  |  |  |  |
|  | NQO1 | 3.27E-09 | 1.674655 |  |  |  |  |  |  |  |  |
|  | PKIA | 3.27E-09 | -1.24657 |  |  |  |  |  |  |  |  |
|  | CCDC34 | 3.27E-09 | 1.559654 |  |  |  |  |  |  |  |  |
|  | LDLR | 3.44E-09 | -1.50331 |  |  |  |  |  |  |  |  |
|  | ERBB3 | 3.48E-09 | 1.133802 |  |  |  |  |  |  |  |  |
|  | KLK10 | 3.53E-09 | -1.67473 |  |  |  |  |  |  |  |  |
|  | PBK | 3.56E-09 | 1.704053 |  |  |  |  |  |  |  |  |
|  | REEP6 | 3.66E-09 | 1.271299 |  |  |  |  |  |  |  |  |
|  | GTSE1 | 3.73E-09 | 1.847331 |  |  |  |  |  |  |  |  |
|  | PLLP | 3.73E-09 | -1.45881 |  |  |  |  |  |  |  |  |
|  | CXCL14 | 3.78E-09 | 3.023111 |  |  |  |  |  |  |  |  |
|  | KIF15 | 3.81E-09 | 1.413121 |  |  |  |  |  |  |  |  |
|  | ADAM28 | 3.84E-09 | 1.825215 |  |  |  |  |  |  |  |  |
|  | FPR1 | 4.09E-09 | -1.64674 |  |  |  |  |  |  |  |  |
|  | RNFT2 | 4.11E-09 | 1.027884 |  |  |  |  |  |  |  |  |
|  | KLRG2 | 4.21E-09 | -1.04399 |  |  |  |  |  |  |  |  |
|  | SIX1 | 4.21E-09 | 1.93287 |  |  |  |  |  |  |  |  |
|  | MAFF | 4.30E-09 | -1.71161 |  |  |  |  |  |  |  |  |
|  | UNC13D | 4.42E-09 | -1.21026 |  |  |  |  |  |  |  |  |
|  | LRRC8E | 4.46E-09 | 1.079631 |  |  |  |  |  |  |  |  |
|  | LOC100049716 | 4.47E-09 | -1.29113 |  |  |  |  |  |  |  |  |
|  | LARP6 | 4.47E-09 | -1.04089 |  |  |  |  |  |  |  |  |
|  | TM6SF1 | 4.66E-09 | -1.17723 |  |  |  |  |  |  |  |  |
|  | CMTM2 | 4.76E-09 | -1.71653 |  |  |  |  |  |  |  |  |
|  | DNAJC22 | 4.98E-09 | 1.145516 |  |  |  |  |  |  |  |  |
|  | PLEKHG4B | 5.02E-09 | 1.573883 |  |  |  |  |  |  |  |  |
|  | HOXA-AS2 | 5.15E-09 | -1.0637 |  |  |  |  |  |  |  |  |
|  | MST1R | 5.17E-09 | 1.048158 |  |  |  |  |  |  |  |  |
|  | WNT2B | 5.29E-09 | -1.24412 |  |  |  |  |  |  |  |  |
|  | NR2F1 | 5.44E-09 | -1.1347 |  |  |  |  |  |  |  |  |
|  | HHAT | 5.47E-09 | 1.129257 |  |  |  |  |  |  |  |  |
|  | SESN1 | 5.49E-09 | -1.03079 |  |  |  |  |  |  |  |  |
|  | SRPX2 | 5.61E-09 | 1.661308 |  |  |  |  |  |  |  |  |
|  | ACSS3 | 5.73E-09 | -1.37623 |  |  |  |  |  |  |  |  |
|  | IFT57 | 5.85E-09 | -1.1892 |  |  |  |  |  |  |  |  |
|  | PTGDS | 5.89E-09 | -1.3446 |  |  |  |  |  |  |  |  |
|  | EID3 | 5.91E-09 | -1.03152 |  |  |  |  |  |  |  |  |
|  | NDC80 | 6.04E-09 | 1.672849 |  |  |  |  |  |  |  |  |
|  | MYRF | 6.07E-09 | -1.82108 |  |  |  |  |  |  |  |  |
|  | DPP4 | 6.20E-09 | 1.614044 |  |  |  |  |  |  |  |  |
|  | KIAA1522 | 6.36E-09 | 1.05784 |  |  |  |  |  |  |  |  |
|  | RCAN1 | 6.54E-09 | -1.10398 |  |  |  |  |  |  |  |  |
|  | NR4A3 | 6.57E-09 | -2.04061 |  |  |  |  |  |  |  |  |
|  | MCM4 | 6.64E-09 | 1.224331 |  |  |  |  |  |  |  |  |
|  | PLCE1 | 6.65E-09 | -1.07765 |  |  |  |  |  |  |  |  |
|  | TMEM140 | 6.75E-09 | -1.01687 |  |  |  |  |  |  |  |  |
|  | LOC100506725 | 6.95E-09 | -1.44651 |  |  |  |  |  |  |  |  |
|  | SPATS2L | 6.98E-09 | -1.16566 |  |  |  |  |  |  |  |  |
|  | SLCO5A1 | 7.02E-09 | 1.367895 |  |  |  |  |  |  |  |  |
|  | SETBP1 | 7.12E-09 | -1.25884 |  |  |  |  |  |  |  |  |
|  | CBLC | 7.16E-09 | 1.242241 |  |  |  |  |  |  |  |  |
|  | E2F3 | 7.32E-09 | 1.247925 |  |  |  |  |  |  |  |  |
|  | ZBED2 | 7.52E-09 | -2.84863 |  |  |  |  |  |  |  |  |
|  | FCN1 | 7.66E-09 | -1.95452 |  |  |  |  |  |  |  |  |
|  | FILIP1L | 7.71E-09 | -1.09208 |  |  |  |  |  |  |  |  |
|  | PDCD1LG2 | 7.78E-09 | -1.13111 |  |  |  |  |  |  |  |  |
|  | GFRA3 | 7.99E-09 | 2.091964 |  |  |  |  |  |  |  |  |
|  | ZFP36 | 8.08E-09 | -1.57171 |  |  |  |  |  |  |  |  |
|  | RBPMS-AS1 | 8.17E-09 | -1.13321 |  |  |  |  |  |  |  |  |
|  | OR7E14P | 8.25E-09 | 1.296119 |  |  |  |  |  |  |  |  |
|  | KRTCAP3 | 8.40E-09 | 1.052589 |  |  |  |  |  |  |  |  |
|  | DEPDC1B | 8.72E-09 | 1.436036 |  |  |  |  |  |  |  |  |
|  | SGO2 | 8.84E-09 | 1.348339 |  |  |  |  |  |  |  |  |
|  | EIF5 | 8.90E-09 | -1.01895 |  |  |  |  |  |  |  |  |
|  | SOD3 | 8.90E-09 | -1.01641 |  |  |  |  |  |  |  |  |
|  | GVINP1 | 8.97E-09 | -1.2696 |  |  |  |  |  |  |  |  |
|  | KCNAB1 | 9.23E-09 | -1.18386 |  |  |  |  |  |  |  |  |
|  | TMEM54 | 9.29E-09 | 1.09301 |  |  |  |  |  |  |  |  |
|  | COL9A2 | 9.60E-09 | 1.613716 |  |  |  |  |  |  |  |  |
|  | FGF14 | 9.65E-09 | -1.33813 |  |  |  |  |  |  |  |  |
|  | CAPN12 | 1.00E-08 | 1.128724 |  |  |  |  |  |  |  |  |
|  | ODF3L1 | 1.03E-08 | -1.18745 |  |  |  |  |  |  |  |  |
|  | KCNA5 | 1.05E-08 | -1.15923 |  |  |  |  |  |  |  |  |
|  | SULF1 | 1.06E-08 | 2.023805 |  |  |  |  |  |  |  |  |
|  | CLEC4E | 1.06E-08 | -1.56743 |  |  |  |  |  |  |  |  |
|  | PRR11 | 1.07E-08 | 1.47877 |  |  |  |  |  |  |  |  |
|  | EXO1 | 1.07E-08 | 1.122312 |  |  |  |  |  |  |  |  |
|  | PKHD1L1 | 1.09E-08 | -1.37717 |  |  |  |  |  |  |  |  |
|  | MSX1 | 1.10E-08 | -1.21136 |  |  |  |  |  |  |  |  |
|  | C3orf14 | 1.11E-08 | 1.471192 |  |  |  |  |  |  |  |  |
|  | TIMP1 | 1.11E-08 | 1.403211 |  |  |  |  |  |  |  |  |
|  | RTN1 | 1.14E-08 | -1.31371 |  |  |  |  |  |  |  |  |
|  | HIST1H2BD | 1.17E-08 | 1.389175 |  |  |  |  |  |  |  |  |
|  | HEYL | 1.17E-08 | -1.16031 |  |  |  |  |  |  |  |  |
|  | RHOB | 1.18E-08 | -1.04809 |  |  |  |  |  |  |  |  |
|  | TEX10 | 1.20E-08 | -1.0384 |  |  |  |  |  |  |  |  |
|  | CENPM | 1.23E-08 | 1.048268 |  |  |  |  |  |  |  |  |
|  | FAXC | 1.23E-08 | 1.808963 |  |  |  |  |  |  |  |  |
|  | TUBB1 | 1.26E-08 | -1.86137 |  |  |  |  |  |  |  |  |
|  | DPP10 | 1.28E-08 | 1.185117 |  |  |  |  |  |  |  |  |
|  | CNN1 | 1.31E-08 | -1.49109 |  |  |  |  |  |  |  |  |
|  | C2 | 1.31E-08 | -1.55745 |  |  |  |  |  |  |  |  |
|  | SEC24D | 1.33E-08 | 1.11136 |  |  |  |  |  |  |  |  |
|  | KIF23 | 1.35E-08 | 1.508495 |  |  |  |  |  |  |  |  |
|  | RPP40 | 1.36E-08 | 1.143742 |  |  |  |  |  |  |  |  |
|  | VSNL1 | 1.38E-08 | -1.0601 |  |  |  |  |  |  |  |  |
|  | IDH1 | 1.38E-08 | 1.076992 |  |  |  |  |  |  |  |  |
|  | ETS2 | 1.39E-08 | -1.0514 |  |  |  |  |  |  |  |  |
|  | OAZ3 | 1.39E-08 | 1.039523 |  |  |  |  |  |  |  |  |
|  | OVOL1 | 1.41E-08 | 1.249312 |  |  |  |  |  |  |  |  |
|  | CRYM | 1.42E-08 | 1.807734 |  |  |  |  |  |  |  |  |
|  | COL3A1 | 1.44E-08 | 2.077045 |  |  |  |  |  |  |  |  |
|  | FARP1 | 1.45E-08 | 1.511322 |  |  |  |  |  |  |  |  |
|  | FLJ35700 | 1.49E-08 | -3.16181 |  |  |  |  |  |  |  |  |
|  | CD247 | 1.58E-08 | -1.23968 |  |  |  |  |  |  |  |  |
|  | TTC22 | 1.59E-08 | 1.209251 |  |  |  |  |  |  |  |  |
|  | BACE2 | 1.60E-08 | 1.356806 |  |  |  |  |  |  |  |  |
|  | EGF | 1.66E-08 | 1.429285 |  |  |  |  |  |  |  |  |
|  | KRT15 | 1.66E-08 | 2.153219 |  |  |  |  |  |  |  |  |
|  | CLU | 1.67E-08 | -1.44856 |  |  |  |  |  |  |  |  |
|  | LINC00342 | 1.72E-08 | 2.017968 |  |  |  |  |  |  |  |  |
|  | CCNE1 | 1.74E-08 | 1.286748 |  |  |  |  |  |  |  |  |
|  | LRP8 | 1.75E-08 | 1.492982 |  |  |  |  |  |  |  |  |
|  | GZMB | 1.79E-08 | -1.82669 |  |  |  |  |  |  |  |  |
|  | NT5E | 1.79E-08 | 1.655724 |  |  |  |  |  |  |  |  |
|  | IL4I1 | 1.80E-08 | 1.315459 |  |  |  |  |  |  |  |  |
|  | CD160 | 1.83E-08 | -1.19263 |  |  |  |  |  |  |  |  |
|  | SPINK1 | 1.91E-08 | 3.791297 |  |  |  |  |  |  |  |  |
|  | MFSD4A | 1.92E-08 | 1.862532 |  |  |  |  |  |  |  |  |
|  | IL7R | 1.92E-08 | -1.84483 |  |  |  |  |  |  |  |  |
|  | SCARA5 | 1.94E-08 | -1.89052 |  |  |  |  |  |  |  |  |
|  | NPY1R | 1.94E-08 | -1.6075 |  |  |  |  |  |  |  |  |
|  | DYNC1I2 | 1.96E-08 | -1.37696 |  |  |  |  |  |  |  |  |
|  | DNA2 | 1.97E-08 | 1.080005 |  |  |  |  |  |  |  |  |
|  | ABCG2 | 2.04E-08 | -1.35647 |  |  |  |  |  |  |  |  |
|  | FAT4 | 2.06E-08 | -1.07288 |  |  |  |  |  |  |  |  |
|  | SLC35F2 | 2.08E-08 | 1.541577 |  |  |  |  |  |  |  |  |
|  | ARID5A | 2.11E-08 | -1.02594 |  |  |  |  |  |  |  |  |
|  | TNFRSF18 | 2.12E-08 | 1.054527 |  |  |  |  |  |  |  |  |
|  | DHFR | 2.14E-08 | 1.216137 |  |  |  |  |  |  |  |  |
|  | NFE2L3 | 2.16E-08 | 1.312877 |  |  |  |  |  |  |  |  |
|  | NECAB1 | 2.17E-08 | -1.62503 |  |  |  |  |  |  |  |  |
|  | ADAM33 | 2.18E-08 | -1.10944 |  |  |  |  |  |  |  |  |
|  | VWA1 | 2.19E-08 | 1.34959 |  |  |  |  |  |  |  |  |
|  | CCL23 | 2.22E-08 | -1.83051 |  |  |  |  |  |  |  |  |
|  | LOC643733 | 2.29E-08 | -1.22389 |  |  |  |  |  |  |  |  |
|  | TBX21 | 2.37E-08 | -1.14649 |  |  |  |  |  |  |  |  |
|  | KLHL7 | 2.39E-08 | 1.195034 |  |  |  |  |  |  |  |  |
|  | AGMAT | 2.41E-08 | 1.012033 |  |  |  |  |  |  |  |  |
|  | FZD10 | 2.43E-08 | -1.34735 |  |  |  |  |  |  |  |  |
|  | CCND2 | 2.48E-08 | -1.05192 |  |  |  |  |  |  |  |  |
|  | FCGBP | 2.49E-08 | 2.215465 |  |  |  |  |  |  |  |  |
|  | CSF2RB | 2.50E-08 | -1.12129 |  |  |  |  |  |  |  |  |
|  | BRE-AS1 | 2.57E-08 | -1.56823 |  |  |  |  |  |  |  |  |
|  | CYGB | 2.60E-08 | -1.01769 |  |  |  |  |  |  |  |  |
|  | RAD51AP1 | 2.71E-08 | 1.162091 |  |  |  |  |  |  |  |  |
|  | XKRX | 2.73E-08 | 1.539621 |  |  |  |  |  |  |  |  |
|  | DERL3 | 2.75E-08 | 1.04 |  |  |  |  |  |  |  |  |
|  | F12 | 2.80E-08 | 1.088877 |  |  |  |  |  |  |  |  |
|  | KIAA1211L | 2.80E-08 | -1.057 |  |  |  |  |  |  |  |  |
|  | C1QA | 2.88E-08 | -1.10377 |  |  |  |  |  |  |  |  |
|  | CYP27B1 | 2.89E-08 | 1.667391 |  |  |  |  |  |  |  |  |
|  | BAALC | 2.91E-08 | -1.67613 |  |  |  |  |  |  |  |  |
|  | FBP1 | 2.95E-08 | -1.16163 |  |  |  |  |  |  |  |  |
|  | WNT2 | 2.98E-08 | -1.12397 |  |  |  |  |  |  |  |  |
|  | BOLA1 | 2.99E-08 | 1.034239 |  |  |  |  |  |  |  |  |
|  | INMT | 3.00E-08 | -1.7016 |  |  |  |  |  |  |  |  |
|  | CLC | 3.01E-08 | -1.42837 |  |  |  |  |  |  |  |  |
|  | FOXO6 | 3.11E-08 | 1.046527 |  |  |  |  |  |  |  |  |
|  | ATAD2 | 3.16E-08 | 1.269091 |  |  |  |  |  |  |  |  |
|  | MMRN1 | 3.19E-08 | -2.25758 |  |  |  |  |  |  |  |  |
|  | MYH11 | 3.31E-08 | -1.40483 |  |  |  |  |  |  |  |  |
|  | PGC | 3.31E-08 | -2.40303 |  |  |  |  |  |  |  |  |
|  | AQP1 | 3.34E-08 | -1.57198 |  |  |  |  |  |  |  |  |
|  | ARHGAP44 | 3.34E-08 | -1.04243 |  |  |  |  |  |  |  |  |
|  | CADM1 | 3.35E-08 | -1.20092 |  |  |  |  |  |  |  |  |
|  | MYOCD | 3.35E-08 | -1.2472 |  |  |  |  |  |  |  |  |
|  | PCDHGC3 | 3.39E-08 | -1.48203 |  |  |  |  |  |  |  |  |
|  | ESRP1 | 3.84E-08 | 1.046929 |  |  |  |  |  |  |  |  |
|  | MMP1 | 3.90E-08 | 3.591153 |  |  |  |  |  |  |  |  |
|  | LOC101927263 | 3.94E-08 | -1.04113 |  |  |  |  |  |  |  |  |
|  | ROBO2 | 4.00E-08 | -1.50653 |  |  |  |  |  |  |  |  |
|  | LRCH2 | 4.08E-08 | -1.41457 |  |  |  |  |  |  |  |  |
|  | LOXL1-AS1 | 4.08E-08 | 1.232182 |  |  |  |  |  |  |  |  |
|  | GRTP1 | 4.31E-08 | 1.510656 |  |  |  |  |  |  |  |  |
|  | PCM1 | 4.34E-08 | -1.11177 |  |  |  |  |  |  |  |  |
|  | C6orf141 | 4.35E-08 | 1.292849 |  |  |  |  |  |  |  |  |
|  | ATF3 | 4.36E-08 | -1.90323 |  |  |  |  |  |  |  |  |
|  | PHLDA2 | 4.37E-08 | 2.261703 |  |  |  |  |  |  |  |  |
|  | SLC5A3 | 4.38E-08 | 1.400566 |  |  |  |  |  |  |  |  |
|  | CXorf57 | 4.64E-08 | -1.24372 |  |  |  |  |  |  |  |  |
|  | CSGALNACT1 | 4.64E-08 | -1.17115 |  |  |  |  |  |  |  |  |
|  | PCDH7 | 4.76E-08 | 1.970368 |  |  |  |  |  |  |  |  |
|  | RAB37 | 4.79E-08 | -1.04204 |  |  |  |  |  |  |  |  |
|  | FGL2 | 4.83E-08 | -1.01504 |  |  |  |  |  |  |  |  |
|  | TSLP | 4.86E-08 | -1.47651 |  |  |  |  |  |  |  |  |
|  | ADGRA3 | 4.92E-08 | 1.080588 |  |  |  |  |  |  |  |  |
|  | MET | 5.15E-08 | 1.249789 |  |  |  |  |  |  |  |  |
|  | S100A8 | 5.18E-08 | -2.44903 |  |  |  |  |  |  |  |  |
|  | HIC1 | 5.26E-08 | -1.08312 |  |  |  |  |  |  |  |  |
|  | TNFRSF21 | 5.39E-08 | 1.160653 |  |  |  |  |  |  |  |  |
|  | MFSD4B | 5.41E-08 | 1.054569 |  |  |  |  |  |  |  |  |
|  | GATA6 | 5.42E-08 | -1.59392 |  |  |  |  |  |  |  |  |
|  | NTN4 | 5.43E-08 | -1.2477 |  |  |  |  |  |  |  |  |
|  | BLNK | 5.51E-08 | 1.582566 |  |  |  |  |  |  |  |  |
|  | PITPNC1 | 5.54E-08 | -1.13006 |  |  |  |  |  |  |  |  |
|  | FST | 5.62E-08 | -1.4777 |  |  |  |  |  |  |  |  |
|  | TMEM237 | 5.70E-08 | -1.0018 |  |  |  |  |  |  |  |  |
|  | WDHD1 | 5.73E-08 | 1.283449 |  |  |  |  |  |  |  |  |
|  | ZNF107 | 5.74E-08 | 1.242953 |  |  |  |  |  |  |  |  |
|  | CXCL2 | 5.82E-08 | -2.18561 |  |  |  |  |  |  |  |  |
|  | SLCO1A2 | 5.89E-08 | -1.13929 |  |  |  |  |  |  |  |  |
|  | NUF2 | 5.91E-08 | 1.720599 |  |  |  |  |  |  |  |  |
|  | MAP2 | 5.95E-08 | -1.20732 |  |  |  |  |  |  |  |  |
|  | HRASLS | 5.99E-08 | 1.476608 |  |  |  |  |  |  |  |  |
|  | ATP5S | 6.00E-08 | -1.06762 |  |  |  |  |  |  |  |  |
|  | MAP3K8 | 6.06E-08 | -1.37318 |  |  |  |  |  |  |  |  |
|  | SYNC | 6.25E-08 | -1.03633 |  |  |  |  |  |  |  |  |
|  | BCL11A | 6.28E-08 | 1.682951 |  |  |  |  |  |  |  |  |
|  | PDIK1L | 6.42E-08 | 1.055397 |  |  |  |  |  |  |  |  |
|  | TMEM139 | 6.44E-08 | -1.37096 |  |  |  |  |  |  |  |  |
|  | FA2H | 6.47E-08 | 1.559039 |  |  |  |  |  |  |  |  |
|  | KLB | 6.55E-08 | -1.50788 |  |  |  |  |  |  |  |  |
|  | TGFB2 | 6.65E-08 | -1.42226 |  |  |  |  |  |  |  |  |
|  | CD274 | 6.99E-08 | -1.65263 |  |  |  |  |  |  |  |  |
|  | MT2A | 7.01E-08 | -1.31195 |  |  |  |  |  |  |  |  |
|  | ADAM12 | 7.21E-08 | 1.918601 |  |  |  |  |  |  |  |  |
|  | CSF3 | 7.67E-08 | -2.03545 |  |  |  |  |  |  |  |  |
|  | CCDC144NL-AS1 | 7.74E-08 | -1.11401 |  |  |  |  |  |  |  |  |
|  | NKD1 | 7.75E-08 | -1.07698 |  |  |  |  |  |  |  |  |
|  | TUBBP5 | 7.76E-08 | 1.120948 |  |  |  |  |  |  |  |  |
|  | MOCOS | 7.84E-08 | 1.216021 |  |  |  |  |  |  |  |  |
|  | RSPO4 | 7.92E-08 | -1.11776 |  |  |  |  |  |  |  |  |
|  | HPSE | 7.93E-08 | 1.190884 |  |  |  |  |  |  |  |  |
|  | CEACAM6 | 7.97E-08 | 1.520052 |  |  |  |  |  |  |  |  |
|  | EGFL6 | 8.25E-08 | -1.18059 |  |  |  |  |  |  |  |  |
|  | MIR34A | 8.73E-08 | 1.161096 |  |  |  |  |  |  |  |  |
|  | FLRT3 | 8.75E-08 | -1.41422 |  |  |  |  |  |  |  |  |
|  | RERG | 8.79E-08 | -1.45217 |  |  |  |  |  |  |  |  |
|  | CENPW | 8.92E-08 | 1.053289 |  |  |  |  |  |  |  |  |
|  | MRGPRF | 9.16E-08 | -1.33054 |  |  |  |  |  |  |  |  |
|  | AQP9 | 9.24E-08 | -1.61927 |  |  |  |  |  |  |  |  |
|  | NRIP3 | 9.36E-08 | 2.042941 |  |  |  |  |  |  |  |  |
|  | CDC45 | 9.66E-08 | 1.030012 |  |  |  |  |  |  |  |  |
|  | C8B | 9.81E-08 | -1.26446 |  |  |  |  |  |  |  |  |
|  | GRHL2 | 9.83E-08 | 1.051819 |  |  |  |  |  |  |  |  |
|  | ADAM8 | 9.95E-08 | 1.40842 |  |  |  |  |  |  |  |  |
|  | OIP5 | 1.01E-07 | 1.150615 |  |  |  |  |  |  |  |  |
|  | ST6GALNAC2 | 1.02E-07 | -1.15851 |  |  |  |  |  |  |  |  |
|  | TTC39A | 1.02E-07 | 1.068209 |  |  |  |  |  |  |  |  |
|  | SH2D1B | 1.05E-07 | -1.56875 |  |  |  |  |  |  |  |  |
|  | OSBPL6 | 1.06E-07 | -1.15087 |  |  |  |  |  |  |  |  |
|  | ADM | 1.07E-07 | -1.68857 |  |  |  |  |  |  |  |  |
|  | S100A2 | 1.11E-07 | 1.870015 |  |  |  |  |  |  |  |  |
|  | PAPLN | 1.16E-07 | 1.174354 |  |  |  |  |  |  |  |  |
|  | CXCL13 | 1.20E-07 | 3.403312 |  |  |  |  |  |  |  |  |
|  | PKIB | 1.20E-07 | 1.635567 |  |  |  |  |  |  |  |  |
|  | PSPH | 1.21E-07 | 1.396082 |  |  |  |  |  |  |  |  |
|  | C15orf48 | 1.23E-07 | 2.025493 |  |  |  |  |  |  |  |  |
|  | SLC9A3R2 | 1.23E-07 | -1.255 |  |  |  |  |  |  |  |  |
|  | CXCL12 | 1.23E-07 | -1.40128 |  |  |  |  |  |  |  |  |
|  | TUB | 1.25E-07 | -1.0091 |  |  |  |  |  |  |  |  |
|  | TPPP | 1.26E-07 | -1.34893 |  |  |  |  |  |  |  |  |
|  | ZNF138 | 1.28E-07 | 1.053476 |  |  |  |  |  |  |  |  |
|  | NDUFA4L2 | 1.30E-07 | -1.05473 |  |  |  |  |  |  |  |  |
|  | CRISPLD2 | 1.31E-07 | -1.35023 |  |  |  |  |  |  |  |  |
|  | RND3 | 1.35E-07 | -1.06853 |  |  |  |  |  |  |  |  |
|  | FAP | 1.37E-07 | 1.551206 |  |  |  |  |  |  |  |  |
|  | LILRA2 | 1.37E-07 | -1.27534 |  |  |  |  |  |  |  |  |
|  | CD163 | 1.40E-07 | -1.07973 |  |  |  |  |  |  |  |  |
|  | IL18RAP | 1.44E-07 | -1.36044 |  |  |  |  |  |  |  |  |
|  | PDE4D | 1.45E-07 | -1.16123 |  |  |  |  |  |  |  |  |
|  | PF4 | 1.45E-07 | -1.31854 |  |  |  |  |  |  |  |  |
|  | SOCS3 | 1.45E-07 | -1.9438 |  |  |  |  |  |  |  |  |
|  | MST1 | 1.47E-07 | 1.141941 |  |  |  |  |  |  |  |  |
|  | MMP15 | 1.47E-07 | 1.022034 |  |  |  |  |  |  |  |  |
|  | LIPH | 1.48E-07 | 1.077378 |  |  |  |  |  |  |  |  |
|  | FKBP11 | 1.49E-07 | 1.188054 |  |  |  |  |  |  |  |  |
|  | TMEM97 | 1.50E-07 | 1.199111 |  |  |  |  |  |  |  |  |
|  | SPC25 | 1.51E-07 | 1.178213 |  |  |  |  |  |  |  |  |
|  | NRP1 | 1.59E-07 | -1.00598 |  |  |  |  |  |  |  |  |
|  | MUC1 | 1.60E-07 | 1.296495 |  |  |  |  |  |  |  |  |
|  | SLC16A7 | 1.63E-07 | 1.492165 |  |  |  |  |  |  |  |  |
|  | METTL1 | 1.63E-07 | 1.038656 |  |  |  |  |  |  |  |  |
|  | NFIL3 | 1.64E-07 | -1.29267 |  |  |  |  |  |  |  |  |
|  | PEG3 | 1.71E-07 | -1.31727 |  |  |  |  |  |  |  |  |
|  | NR5A2 | 1.71E-07 | -1.5793 |  |  |  |  |  |  |  |  |
|  | IRF7 | 1.79E-07 | 1.141353 |  |  |  |  |  |  |  |  |
|  | TCF19 | 1.82E-07 | 1.012843 |  |  |  |  |  |  |  |  |
|  | PROK2 | 1.83E-07 | -2.62588 |  |  |  |  |  |  |  |  |
|  | PPFIBP2 | 1.86E-07 | 1.22585 |  |  |  |  |  |  |  |  |
|  | DMD | 1.86E-07 | -1.01865 |  |  |  |  |  |  |  |  |
|  | LMNB1 | 2.04E-07 | 1.285027 |  |  |  |  |  |  |  |  |
|  | ADAMTS9 | 2.05E-07 | -1.0824 |  |  |  |  |  |  |  |  |
|  | C1orf226 | 2.08E-07 | 1.192458 |  |  |  |  |  |  |  |  |
|  | ALOX5AP | 2.16E-07 | -1.22231 |  |  |  |  |  |  |  |  |
|  | ABCA12 | 2.17E-07 | 1.751885 |  |  |  |  |  |  |  |  |
|  | IGFBPL1 | 2.28E-07 | 1.21134 |  |  |  |  |  |  |  |  |
|  | ACSL5 | 2.54E-07 | 1.099534 |  |  |  |  |  |  |  |  |
|  | LCT | 2.60E-07 | 1.423468 |  |  |  |  |  |  |  |  |
|  | XCL1 | 2.62E-07 | -1.02437 |  |  |  |  |  |  |  |  |
|  | CRTAM | 2.65E-07 | -1.09815 |  |  |  |  |  |  |  |  |
|  | ANK2 | 2.73E-07 | -1.18603 |  |  |  |  |  |  |  |  |
|  | EGLN3 | 2.74E-07 | 1.114064 |  |  |  |  |  |  |  |  |
|  | REEP1 | 2.74E-07 | -1.35567 |  |  |  |  |  |  |  |  |
|  | STK31 | 2.77E-07 | 1.447721 |  |  |  |  |  |  |  |  |
|  | AXIN2 | 2.79E-07 | -1.19234 |  |  |  |  |  |  |  |  |
|  | COL1A2 | 2.81E-07 | 1.859319 |  |  |  |  |  |  |  |  |
|  | RAMP1 | 2.89E-07 | 1.087594 |  |  |  |  |  |  |  |  |
|  | CEACAM5 | 2.95E-07 | 3.742382 |  |  |  |  |  |  |  |  |
|  | LOC101928429 | 2.96E-07 | -1.29859 |  |  |  |  |  |  |  |  |
|  | NPAS2 | 2.98E-07 | 1.061006 |  |  |  |  |  |  |  |  |
|  | LYPD1 | 2.99E-07 | 1.294865 |  |  |  |  |  |  |  |  |
|  | HCK | 3.01E-07 | -1.0919 |  |  |  |  |  |  |  |  |
|  | CTGF | 3.01E-07 | -1.3312 |  |  |  |  |  |  |  |  |
|  | HNF4G | 3.03E-07 | 1.266774 |  |  |  |  |  |  |  |  |
|  | KLK11 | 3.06E-07 | -1.4396 |  |  |  |  |  |  |  |  |
|  | KIAA0895 | 3.10E-07 | 1.227458 |  |  |  |  |  |  |  |  |
|  | MAOA | 3.15E-07 | -1.40615 |  |  |  |  |  |  |  |  |
|  | ACE2 | 3.15E-07 | 1.394002 |  |  |  |  |  |  |  |  |
|  | HOXD4 | 3.23E-07 | 1.054287 |  |  |  |  |  |  |  |  |
|  | ADGRL4 | 3.35E-07 | -1.23721 |  |  |  |  |  |  |  |  |
|  | ARHGAP28 | 3.36E-07 | -1.31033 |  |  |  |  |  |  |  |  |
|  | ANKRD36B | 3.36E-07 | 1.409166 |  |  |  |  |  |  |  |  |
|  | CDKN2B | 3.41E-07 | -1.38791 |  |  |  |  |  |  |  |  |
|  | PCDHB4 | 3.42E-07 | -1.03903 |  |  |  |  |  |  |  |  |
|  | GZMA | 3.50E-07 | -1.06608 |  |  |  |  |  |  |  |  |
|  | ADD2 | 3.53E-07 | -1.01232 |  |  |  |  |  |  |  |  |
|  | GJA5 | 3.54E-07 | -1.57951 |  |  |  |  |  |  |  |  |
|  | SMTNL2 | 3.57E-07 | -1.06822 |  |  |  |  |  |  |  |  |
|  | OLFML3 | 3.71E-07 | -1.04207 |  |  |  |  |  |  |  |  |
|  | ZNF280B | 3.73E-07 | 1.281348 |  |  |  |  |  |  |  |  |
|  | CASQ2 | 3.74E-07 | -1.13718 |  |  |  |  |  |  |  |  |
|  | MYH2 | 3.78E-07 | -1.05043 |  |  |  |  |  |  |  |  |
|  | DDX11 | 3.78E-07 | 1.143693 |  |  |  |  |  |  |  |  |
|  | ST8SIA1 | 3.80E-07 | -1.28516 |  |  |  |  |  |  |  |  |
|  | KLF15 | 3.83E-07 | -1.19233 |  |  |  |  |  |  |  |  |
|  | ITGB4 | 3.95E-07 | 1.219543 |  |  |  |  |  |  |  |  |
|  | COL8A2 | 4.11E-07 | 1.345547 |  |  |  |  |  |  |  |  |
|  | DCLK1 | 4.11E-07 | 1.532122 |  |  |  |  |  |  |  |  |
|  | EEF1A2 | 4.51E-07 | 1.870903 |  |  |  |  |  |  |  |  |
|  | PLCH1 | 4.57E-07 | 1.401175 |  |  |  |  |  |  |  |  |
|  | FGFR2 | 4.57E-07 | -1.2057 |  |  |  |  |  |  |  |  |
|  | LOC728613 | 4.59E-07 | 1.465079 |  |  |  |  |  |  |  |  |
|  | MPZL2 | 4.64E-07 | 1.124975 |  |  |  |  |  |  |  |  |
|  | HSPB3 | 4.75E-07 | -1.06976 |  |  |  |  |  |  |  |  |
|  | CSF3R | 4.75E-07 | -1.20534 |  |  |  |  |  |  |  |  |
|  | MALL | 4.80E-07 | 1.101224 |  |  |  |  |  |  |  |  |
|  | MT1HL1 | 4.82E-07 | -1.1841 |  |  |  |  |  |  |  |  |
|  | COLEC12 | 4.87E-07 | -1.05843 |  |  |  |  |  |  |  |  |
|  | FAM167A | 4.95E-07 | -1.3539 |  |  |  |  |  |  |  |  |
|  | ANXA9 | 4.96E-07 | 1.020651 |  |  |  |  |  |  |  |  |
|  | LRRC2 | 4.98E-07 | -1.03229 |  |  |  |  |  |  |  |  |
|  | FOXA3 | 5.19E-07 | 1.485265 |  |  |  |  |  |  |  |  |
|  | PLS1 | 5.29E-07 | 1.006684 |  |  |  |  |  |  |  |  |
|  | P3H4 | 5.30E-07 | 1.273574 |  |  |  |  |  |  |  |  |
|  | CD69 | 5.31E-07 | -1.39111 |  |  |  |  |  |  |  |  |
|  | SULT1C2 | 5.35E-07 | 1.621683 |  |  |  |  |  |  |  |  |
|  | CILP2 | 5.40E-07 | 1.380858 |  |  |  |  |  |  |  |  |
|  | LRRK2 | 5.45E-07 | -1.62 |  |  |  |  |  |  |  |  |
|  | EYA4 | 5.46E-07 | -1.94281 |  |  |  |  |  |  |  |  |
|  | LEMD1 | 5.51E-07 | 1.53903 |  |  |  |  |  |  |  |  |
|  | RGS17 | 5.53E-07 | 1.779293 |  |  |  |  |  |  |  |  |
|  | RAP1GAP | 5.59E-07 | 1.247563 |  |  |  |  |  |  |  |  |
|  | ENTPD3 | 5.68E-07 | 1.5151 |  |  |  |  |  |  |  |  |
|  | SHC3 | 5.76E-07 | -1.47413 |  |  |  |  |  |  |  |  |
|  | IGF2BP3 | 5.78E-07 | 2.665346 |  |  |  |  |  |  |  |  |
|  | RGS18 | 5.81E-07 | -1.46411 |  |  |  |  |  |  |  |  |
|  | SCD5 | 5.85E-07 | -1.02613 |  |  |  |  |  |  |  |  |
|  | SCUBE3 | 5.85E-07 | 1.264642 |  |  |  |  |  |  |  |  |
|  | ITGAL | 5.87E-07 | -1.09175 |  |  |  |  |  |  |  |  |
|  | CX3CR1 | 6.06E-07 | -1.62969 |  |  |  |  |  |  |  |  |
|  | ACSL4 | 6.08E-07 | -1.22942 |  |  |  |  |  |  |  |  |
|  | FGF7 | 6.09E-07 | -1.12222 |  |  |  |  |  |  |  |  |
|  | MT1X | 6.19E-07 | -1.39095 |  |  |  |  |  |  |  |  |
|  | ENPP5 | 6.35E-07 | 1.295727 |  |  |  |  |  |  |  |  |
|  | TENM4 | 6.85E-07 | 1.081491 |  |  |  |  |  |  |  |  |
|  | EME1 | 7.03E-07 | 1.259001 |  |  |  |  |  |  |  |  |
|  | MFAP2 | 7.09E-07 | 1.18932 |  |  |  |  |  |  |  |  |
|  | FOSB | 7.29E-07 | -2.83315 |  |  |  |  |  |  |  |  |
|  | SCNN1G | 7.31E-07 | -1.48005 |  |  |  |  |  |  |  |  |
|  | SYT12 | 7.35E-07 | 1.041968 |  |  |  |  |  |  |  |  |
|  | ADORA3 | 7.46E-07 | 1.319647 |  |  |  |  |  |  |  |  |
|  | GRIP1 | 7.61E-07 | 1.151439 |  |  |  |  |  |  |  |  |
|  | CCNE2 | 7.66E-07 | 1.677547 |  |  |  |  |  |  |  |  |
|  | KISS1R | 7.78E-07 | 1.835812 |  |  |  |  |  |  |  |  |
|  | STEAP1 | 7.78E-07 | 1.830236 |  |  |  |  |  |  |  |  |
|  | COL5A1 | 8.37E-07 | 1.484782 |  |  |  |  |  |  |  |  |
|  | FAM169A | 8.43E-07 | 1.096138 |  |  |  |  |  |  |  |  |
|  | CDKN2A | 8.48E-07 | 1.445143 |  |  |  |  |  |  |  |  |
|  | TEX9 | 8.49E-07 | 1.497184 |  |  |  |  |  |  |  |  |
|  | ADAMDEC1 | 8.50E-07 | 2.486042 |  |  |  |  |  |  |  |  |
|  | TCEAL2 | 8.53E-07 | -1.81094 |  |  |  |  |  |  |  |  |
|  | LRRC15 | 8.57E-07 | 1.909688 |  |  |  |  |  |  |  |  |
|  | GPX8 | 8.61E-07 | 1.660248 |  |  |  |  |  |  |  |  |
|  | CLSTN2 | 8.82E-07 | -1.43051 |  |  |  |  |  |  |  |  |
|  | TCEA3 | 8.88E-07 | 1.141088 |  |  |  |  |  |  |  |  |
|  | KRT8 | 9.00E-07 | 1.209691 |  |  |  |  |  |  |  |  |
|  | SIX2 | 9.08E-07 | 1.016859 |  |  |  |  |  |  |  |  |
|  | PCP4 | 9.38E-07 | 1.961138 |  |  |  |  |  |  |  |  |
|  | PRR15 | 9.51E-07 | 1.307305 |  |  |  |  |  |  |  |  |
|  | CCDC69 | 9.83E-07 | -1.08536 |  |  |  |  |  |  |  |  |
|  | ARNTL2 | 1.00E-06 | 1.005515 |  |  |  |  |  |  |  |  |
|  | HMGA1 | 1.01E-06 | 1.069374 |  |  |  |  |  |  |  |  |
|  | CENPH | 1.01E-06 | 1.007205 |  |  |  |  |  |  |  |  |
|  | ACTG2 | 1.02E-06 | -1.61296 |  |  |  |  |  |  |  |  |
|  | PWAR6 | 1.06E-06 | -1.06391 |  |  |  |  |  |  |  |  |
|  | CD34 | 1.10E-06 | -1.14987 |  |  |  |  |  |  |  |  |
|  | HGF | 1.10E-06 | -1.1046 |  |  |  |  |  |  |  |  |
|  | SFRP4 | 1.11E-06 | 1.826936 |  |  |  |  |  |  |  |  |
|  | EP300-AS1 | 1.11E-06 | -1.18695 |  |  |  |  |  |  |  |  |
|  | DSG2 | 1.12E-06 | 1.012034 |  |  |  |  |  |  |  |  |
|  | TPPP3 | 1.12E-06 | -1.42827 |  |  |  |  |  |  |  |  |
|  | FAM134B | 1.13E-06 | -1.33246 |  |  |  |  |  |  |  |  |
|  | SOX11 | 1.15E-06 | 1.666368 |  |  |  |  |  |  |  |  |
|  | CFB | 1.15E-06 | 1.783169 |  |  |  |  |  |  |  |  |
|  | SFTPD | 1.16E-06 | -1.90671 |  |  |  |  |  |  |  |  |
|  | ZNF117 | 1.16E-06 | 1.130141 |  |  |  |  |  |  |  |  |
|  | PRRG3 | 1.16E-06 | -1.4244 |  |  |  |  |  |  |  |  |
|  | MCM10 | 1.17E-06 | 1.098245 |  |  |  |  |  |  |  |  |
|  | CD1A | 1.22E-06 | 1.668168 |  |  |  |  |  |  |  |  |
|  | CYP1B1 | 1.22E-06 | 1.568159 |  |  |  |  |  |  |  |  |
|  | CCL19 | 1.27E-06 | 1.970979 |  |  |  |  |  |  |  |  |
|  | JPH1 | 1.29E-06 | -1.12817 |  |  |  |  |  |  |  |  |
|  | HOXD1 | 1.30E-06 | 1.694156 |  |  |  |  |  |  |  |  |
|  | COL6A5 | 1.31E-06 | -1.0736 |  |  |  |  |  |  |  |  |
|  | SELE | 1.33E-06 | -2.98533 |  |  |  |  |  |  |  |  |
|  | CYP2J2 | 1.34E-06 | 1.081247 |  |  |  |  |  |  |  |  |
|  | PPARGC1B | 1.34E-06 | -1.15322 |  |  |  |  |  |  |  |  |
|  | SFTPB | 1.35E-06 | -1.33476 |  |  |  |  |  |  |  |  |
|  | SLCO2A1 | 1.35E-06 | -1.68354 |  |  |  |  |  |  |  |  |
|  | ACKR3 | 1.36E-06 | -1.20252 |  |  |  |  |  |  |  |  |
|  | SCGB1A1 | 1.38E-06 | -2.68871 |  |  |  |  |  |  |  |  |
|  | CHRM1 | 1.42E-06 | -1.0147 |  |  |  |  |  |  |  |  |
|  | MT1E | 1.43E-06 | -1.13335 |  |  |  |  |  |  |  |  |
|  | MIR146A | 1.43E-06 | 1.284901 |  |  |  |  |  |  |  |  |
|  | SEMA4B | 1.43E-06 | 1.226394 |  |  |  |  |  |  |  |  |
|  | MAP1LC3C | 1.43E-06 | -1.20361 |  |  |  |  |  |  |  |  |
|  | FREM3 | 1.44E-06 | -1.40698 |  |  |  |  |  |  |  |  |
|  | KDR | 1.44E-06 | -1.22438 |  |  |  |  |  |  |  |  |
|  | PLA2G1B | 1.49E-06 | -1.8469 |  |  |  |  |  |  |  |  |
|  | CRLF1 | 1.52E-06 | 2.013597 |  |  |  |  |  |  |  |  |
|  | DMRTA2 | 1.53E-06 | 1.096646 |  |  |  |  |  |  |  |  |
|  | IL1A | 1.53E-06 | -1.13023 |  |  |  |  |  |  |  |  |
|  | PNMAL1 | 1.56E-06 | 1.895479 |  |  |  |  |  |  |  |  |
|  | PLD5 | 1.59E-06 | 1.734537 |  |  |  |  |  |  |  |  |
|  | COL17A1 | 1.60E-06 | 1.034037 |  |  |  |  |  |  |  |  |
|  | FHL2 | 1.62E-06 | 1.393855 |  |  |  |  |  |  |  |  |
|  | MCAM | 1.63E-06 | -1.13333 |  |  |  |  |  |  |  |  |
|  | SERTAD1 | 1.66E-06 | -1.11739 |  |  |  |  |  |  |  |  |
|  | PRICKLE1 | 1.67E-06 | -1.17865 |  |  |  |  |  |  |  |  |
|  | PNMA6A | 1.70E-06 | 1.075819 |  |  |  |  |  |  |  |  |
|  | MXRA5 | 1.72E-06 | 1.263576 |  |  |  |  |  |  |  |  |
|  | P3H2 | 1.76E-06 | -1.32459 |  |  |  |  |  |  |  |  |
|  | CD109 | 1.79E-06 | -1.08355 |  |  |  |  |  |  |  |  |
|  | ABCA4 | 1.83E-06 | 1.908802 |  |  |  |  |  |  |  |  |
|  | JUNB | 1.88E-06 | -1.17148 |  |  |  |  |  |  |  |  |
|  | PLAC8 | 1.94E-06 | -1.20824 |  |  |  |  |  |  |  |  |
|  | MT1H | 1.98E-06 | -1.22365 |  |  |  |  |  |  |  |  |
|  | IRF1 | 1.98E-06 | -1.07165 |  |  |  |  |  |  |  |  |
|  | SECISBP2L | 2.05E-06 | -1.00781 |  |  |  |  |  |  |  |  |
|  | RAB27B | 2.07E-06 | 1.070073 |  |  |  |  |  |  |  |  |
|  | ACKR1 | 2.11E-06 | -1.77672 |  |  |  |  |  |  |  |  |
|  | LRG1 | 2.19E-06 | 1.234415 |  |  |  |  |  |  |  |  |
|  | LAMP5 | 2.34E-06 | 1.432253 |  |  |  |  |  |  |  |  |
|  | PHACTR3 | 2.34E-06 | -1.44733 |  |  |  |  |  |  |  |  |
|  | C4BPB | 2.34E-06 | 1.245037 |  |  |  |  |  |  |  |  |
|  | PLAU | 2.39E-06 | 1.608265 |  |  |  |  |  |  |  |  |
|  | VSIG1 | 2.39E-06 | 1.969136 |  |  |  |  |  |  |  |  |
|  | TENM2 | 2.42E-06 | -1.01439 |  |  |  |  |  |  |  |  |
|  | LRRTM2 | 2.46E-06 | -1.21245 |  |  |  |  |  |  |  |  |
|  | NXF3 | 2.50E-06 | -1.83691 |  |  |  |  |  |  |  |  |
|  | ARSE | 2.52E-06 | 1.664169 |  |  |  |  |  |  |  |  |
|  | ZNF677 | 2.72E-06 | -1.02702 |  |  |  |  |  |  |  |  |
|  | ZNF750 | 2.75E-06 | 1.890754 |  |  |  |  |  |  |  |  |
|  | MYC | 2.84E-06 | -1.37499 |  |  |  |  |  |  |  |  |
|  | CX3CL1 | 2.84E-06 | -1.34249 |  |  |  |  |  |  |  |  |
|  | GALNT6 | 2.89E-06 | 1.59357 |  |  |  |  |  |  |  |  |
|  | CKS2 | 3.00E-06 | 1.018412 |  |  |  |  |  |  |  |  |
|  | OLR1 | 3.05E-06 | -1.45328 |  |  |  |  |  |  |  |  |
|  | PBLD | 3.11E-06 | 1.236213 |  |  |  |  |  |  |  |  |
|  | TNFRSF10D | 3.25E-06 | -1.29459 |  |  |  |  |  |  |  |  |
|  | TESC | 3.40E-06 | 1.414872 |  |  |  |  |  |  |  |  |
|  | PRR15L | 3.41E-06 | 1.223065 |  |  |  |  |  |  |  |  |
|  | SUSD4 | 3.46E-06 | 1.262741 |  |  |  |  |  |  |  |  |
|  | ADORA1 | 3.47E-06 | 1.171638 |  |  |  |  |  |  |  |  |
|  | IGFBP3 | 3.49E-06 | 1.462107 |  |  |  |  |  |  |  |  |
|  | SLC7A5 | 3.55E-06 | 1.406963 |  |  |  |  |  |  |  |  |
|  | ENPP3 | 3.61E-06 | 1.614672 |  |  |  |  |  |  |  |  |
|  | VMP1 | 3.61E-06 | 1.729687 |  |  |  |  |  |  |  |  |
|  | ANKRD1 | 3.63E-06 | -1.28818 |  |  |  |  |  |  |  |  |
|  | KIAA1683 | 3.68E-06 | -1.03122 |  |  |  |  |  |  |  |  |
|  | MMP9 | 3.87E-06 | 1.861704 |  |  |  |  |  |  |  |  |
|  | DUXAP10 | 3.91E-06 | 1.664223 |  |  |  |  |  |  |  |  |
|  | GJC1 | 4.12E-06 | -1.14152 |  |  |  |  |  |  |  |  |
|  | TNC | 4.13E-06 | 1.629043 |  |  |  |  |  |  |  |  |
|  | NLGN4X | 4.16E-06 | -1.18245 |  |  |  |  |  |  |  |  |
|  | EGR1 | 4.17E-06 | -1.27198 |  |  |  |  |  |  |  |  |
|  | CREM | 4.35E-06 | -1.05048 |  |  |  |  |  |  |  |  |
|  | COL5A2 | 4.40E-06 | 1.276963 |  |  |  |  |  |  |  |  |
|  | MT1G | 4.53E-06 | -1.30028 |  |  |  |  |  |  |  |  |
|  | PCDHGA3 | 4.54E-06 | -1.11549 |  |  |  |  |  |  |  |  |
|  | SLC28A3 | 4.59E-06 | 1.307888 |  |  |  |  |  |  |  |  |
|  | CXCL3 | 4.61E-06 | -1.89099 |  |  |  |  |  |  |  |  |
|  | WISP1 | 4.63E-06 | 1.986004 |  |  |  |  |  |  |  |  |
|  | ENPP2 | 4.85E-06 | -1.46928 |  |  |  |  |  |  |  |  |
|  | DENND1B | 5.01E-06 | 1.002746 |  |  |  |  |  |  |  |  |
|  | BCL2A1 | 5.03E-06 | -1.12082 |  |  |  |  |  |  |  |  |
|  | TEAD4 | 5.06E-06 | -1.11786 |  |  |  |  |  |  |  |  |
|  | VSTM2L | 5.38E-06 | 1.008134 |  |  |  |  |  |  |  |  |
|  | CTSW | 5.41E-06 | -1.16744 |  |  |  |  |  |  |  |  |
|  | PLA2G7 | 5.62E-06 | 1.750265 |  |  |  |  |  |  |  |  |
|  | SYTL1 | 5.77E-06 | 1.034598 |  |  |  |  |  |  |  |  |
|  | PLA1A | 5.85E-06 | -1.25641 |  |  |  |  |  |  |  |  |
|  | SLC1A1 | 5.97E-06 | -1.48508 |  |  |  |  |  |  |  |  |
|  | PLOD2 | 5.97E-06 | 1.20823 |  |  |  |  |  |  |  |  |
|  | HAS1 | 6.40E-06 | -1.78157 |  |  |  |  |  |  |  |  |
|  | HLF | 6.91E-06 | -1.20405 |  |  |  |  |  |  |  |  |
|  | TRIM45 | 6.96E-06 | 1.050629 |  |  |  |  |  |  |  |  |
|  | AOC1 | 7.21E-06 | 1.671532 |  |  |  |  |  |  |  |  |
|  | XPO1 | 7.45E-06 | 1.175087 |  |  |  |  |  |  |  |  |
|  | LDOC1 | 7.53E-06 | 1.089824 |  |  |  |  |  |  |  |  |
|  | CLEC5A | 7.54E-06 | 1.435768 |  |  |  |  |  |  |  |  |
|  | CD207 | 7.71E-06 | 1.627544 |  |  |  |  |  |  |  |  |
|  | HIST1H2BH | 7.90E-06 | 1.068483 |  |  |  |  |  |  |  |  |
|  | PLEKHS1 | 7.93E-06 | 1.626096 |  |  |  |  |  |  |  |  |
|  | SLC7A11 | 7.99E-06 | 1.320706 |  |  |  |  |  |  |  |  |
|  | PCSK1N | 8.09E-06 | 1.518703 |  |  |  |  |  |  |  |  |
|  | CCL4 | 8.35E-06 | -1.10949 |  |  |  |  |  |  |  |  |
|  | HMGCS2 | 8.59E-06 | -1.4519 |  |  |  |  |  |  |  |  |
|  | IL1B | 8.80E-06 | -1.4506 |  |  |  |  |  |  |  |  |
|  | MX2 | 9.09E-06 | 1.305102 |  |  |  |  |  |  |  |  |
|  | ANKRD36C | 9.22E-06 | 1.080649 |  |  |  |  |  |  |  |  |
|  | CD19 | 9.98E-06 | 1.050306 |  |  |  |  |  |  |  |  |
|  | PON3 | 1.01E-05 | 1.107395 |  |  |  |  |  |  |  |  |
|  | SMKR1 | 1.02E-05 | 1.085906 |  |  |  |  |  |  |  |  |
|  | RBP4 | 1.05E-05 | -1.5398 |  |  |  |  |  |  |  |  |
|  | CXCL5 | 1.06E-05 | -2.43173 |  |  |  |  |  |  |  |  |
|  | FAM3B | 1.06E-05 | 1.81773 |  |  |  |  |  |  |  |  |
|  | MMP19 | 1.06E-05 | -1.4549 |  |  |  |  |  |  |  |  |
|  | TC2N | 1.06E-05 | 1.063989 |  |  |  |  |  |  |  |  |
|  | HSD17B6 | 1.07E-05 | -1.62586 |  |  |  |  |  |  |  |  |
|  | IRAK3 | 1.07E-05 | -1.27091 |  |  |  |  |  |  |  |  |
|  | GRAMD2 | 1.09E-05 | -1.10065 |  |  |  |  |  |  |  |  |
|  | TSPAN5 | 1.10E-05 | 1.015932 |  |  |  |  |  |  |  |  |
|  | C1QB | 1.12E-05 | -1.00391 |  |  |  |  |  |  |  |  |
|  | CYR61 | 1.13E-05 | -1.13077 |  |  |  |  |  |  |  |  |
|  | CYS1 | 1.13E-05 | -1.16588 |  |  |  |  |  |  |  |  |
|  | CHRM3 | 1.16E-05 | -1.14035 |  |  |  |  |  |  |  |  |
|  | KLRC3 | 1.18E-05 | -1.16882 |  |  |  |  |  |  |  |  |
|  | ZNF667-AS1 | 1.22E-05 | -1.0506 |  |  |  |  |  |  |  |  |
|  | GLDN | 1.23E-05 | -1.30575 |  |  |  |  |  |  |  |  |
|  | CLDN2 | 1.24E-05 | 1.805082 |  |  |  |  |  |  |  |  |
|  | SOX18 | 1.27E-05 | -1.42121 |  |  |  |  |  |  |  |  |
|  | PLCXD3 | 1.29E-05 | -1.16275 |  |  |  |  |  |  |  |  |
|  | LOC100507311 | 1.30E-05 | -1.363 |  |  |  |  |  |  |  |  |
|  | NANOS1 | 1.33E-05 | 1.09841 |  |  |  |  |  |  |  |  |
|  | PRDM6 | 1.36E-05 | -1.2091 |  |  |  |  |  |  |  |  |
|  | GIPC2 | 1.36E-05 | -1.3481 |  |  |  |  |  |  |  |  |
|  | S100A10 | 1.38E-05 | -1.32563 |  |  |  |  |  |  |  |  |
|  | MTARC6 | 1.39E-05 | 1.036146 |  |  |  |  |  |  |  |  |
|  | CLDN11 | 1.45E-05 | -1.46592 |  |  |  |  |  |  |  |  |
|  | ITGA2 | 1.54E-05 | 1.231904 |  |  |  |  |  |  |  |  |
|  | SFRP1 | 1.59E-05 | -1.33581 |  |  |  |  |  |  |  |  |
|  | RASSF9 | 1.70E-05 | -1.03935 |  |  |  |  |  |  |  |  |
|  | ZNF300P1 | 1.76E-05 | -1.1708 |  |  |  |  |  |  |  |  |
|  | MMP13 | 1.78E-05 | 1.303673 |  |  |  |  |  |  |  |  |
|  | TRIP13 | 1.79E-05 | 1.28278 |  |  |  |  |  |  |  |  |
|  | SUSD2 | 1.84E-05 | -1.41188 |  |  |  |  |  |  |  |  |
|  | PPP1R14D | 1.91E-05 | 1.256454 |  |  |  |  |  |  |  |  |
|  | PTGS2 | 2.03E-05 | -1.5918 |  |  |  |  |  |  |  |  |
|  | PTGFR | 2.03E-05 | -1.05032 |  |  |  |  |  |  |  |  |
|  | MUC5B | 2.07E-05 | 1.939846 |  |  |  |  |  |  |  |  |
|  | WDR66 | 2.07E-05 | 2.049912 |  |  |  |  |  |  |  |  |
|  | PLA2G4A | 2.12E-05 | 1.231253 |  |  |  |  |  |  |  |  |
|  | CDKN2C | 2.28E-05 | 1.184991 |  |  |  |  |  |  |  |  |
|  | OMD | 2.29E-05 | -1.25814 |  |  |  |  |  |  |  |  |
|  | FNDC1 | 2.35E-05 | 1.599207 |  |  |  |  |  |  |  |  |
|  | ADTRP | 2.37E-05 | -1.34724 |  |  |  |  |  |  |  |  |
|  | SLC4A11 | 2.54E-05 | 1.05203 |  |  |  |  |  |  |  |  |
|  | MT1F | 2.67E-05 | -1.07885 |  |  |  |  |  |  |  |  |
|  | CA9 | 2.69E-05 | 1.075426 |  |  |  |  |  |  |  |  |
|  | C10orf10 | 2.88E-05 | -1.36216 |  |  |  |  |  |  |  |  |
|  | AQP5 | 2.90E-05 | 1.546602 |  |  |  |  |  |  |  |  |
|  | LCAL1 | 2.92E-05 | 1.652865 |  |  |  |  |  |  |  |  |
|  | PIGR | 2.95E-05 | 1.575024 |  |  |  |  |  |  |  |  |
|  | DEPDC7 | 3.13E-05 | 1.140891 |  |  |  |  |  |  |  |  |
|  | LOC100506922 | 3.15E-05 | 1.003982 |  |  |  |  |  |  |  |  |
|  | MARCKSL1 | 3.16E-05 | 1.029138 |  |  |  |  |  |  |  |  |
|  | SCG5 | 3.27E-05 | 1.845174 |  |  |  |  |  |  |  |  |
|  | LGSN | 3.28E-05 | 1.905858 |  |  |  |  |  |  |  |  |
|  | SEC14L4 | 3.43E-05 | -1.14577 |  |  |  |  |  |  |  |  |
|  | CYP26B1 | 3.51E-05 | -1.06351 |  |  |  |  |  |  |  |  |
|  | TM4SF4 | 3.58E-05 | 1.83389 |  |  |  |  |  |  |  |  |
|  | LINC00551 | 3.66E-05 | -1.70497 |  |  |  |  |  |  |  |  |
|  | TNR | 3.67E-05 | -1.57418 |  |  |  |  |  |  |  |  |
|  | TDO2 | 3.71E-05 | 1.355452 |  |  |  |  |  |  |  |  |
|  | RASSF6 | 3.71E-05 | 1.099991 |  |  |  |  |  |  |  |  |
|  | GPX2 | 3.76E-05 | 1.096144 |  |  |  |  |  |  |  |  |
|  | CEACAM7 | 3.82E-05 | 1.737248 |  |  |  |  |  |  |  |  |
|  | CA2 | 3.87E-05 | -1.48577 |  |  |  |  |  |  |  |  |
|  | EFHC2 | 3.93E-05 | 1.537659 |  |  |  |  |  |  |  |  |
|  | RPS24 | 3.94E-05 | 1.082238 |  |  |  |  |  |  |  |  |
|  | THY1 | 3.99E-05 | 1.279214 |  |  |  |  |  |  |  |  |
|  | MUC16 | 4.01E-05 | 1.307744 |  |  |  |  |  |  |  |  |
|  | POU2AF1 | 4.15E-05 | 1.788683 |  |  |  |  |  |  |  |  |
|  | ABCB1 | 4.27E-05 | -1.89852 |  |  |  |  |  |  |  |  |
|  | HOXC10 | 4.47E-05 | 1.27407 |  |  |  |  |  |  |  |  |
|  | LCN2 | 4.75E-05 | 1.82472 |  |  |  |  |  |  |  |  |
|  | VTCN1 | 4.82E-05 | 1.52974 |  |  |  |  |  |  |  |  |
|  | COL4A5 | 4.83E-05 | -1.04683 |  |  |  |  |  |  |  |  |
|  | FOS | 4.83E-05 | -1.53863 |  |  |  |  |  |  |  |  |
|  | CA10 | 4.92E-05 | 1.633912 |  |  |  |  |  |  |  |  |
|  | PADI4 | 4.96E-05 | -1.18923 |  |  |  |  |  |  |  |  |
|  | COCH | 5.12E-05 | 1.048451 |  |  |  |  |  |  |  |  |
|  | IGLV1-44 | 5.17E-05 | 1.05504 |  |  |  |  |  |  |  |  |
|  | SLCO4A1 | 5.19E-05 | -1.66333 |  |  |  |  |  |  |  |  |
|  | SERPIND1 | 5.39E-05 | 2.127633 |  |  |  |  |  |  |  |  |
|  | HOXB7 | 5.89E-05 | 1.001838 |  |  |  |  |  |  |  |  |
|  | TMEM27 | 6.03E-05 | 1.06336 |  |  |  |  |  |  |  |  |
|  | GALNT14 | 6.05E-05 | 1.13444 |  |  |  |  |  |  |  |  |
|  | PTCH1 | 6.07E-05 | -1.0959 |  |  |  |  |  |  |  |  |
|  | AIM2 | 6.10E-05 | 1.066402 |  |  |  |  |  |  |  |  |
|  | CYP24A1 | 6.23E-05 | 1.021001 |  |  |  |  |  |  |  |  |
|  | KIAA1324 | 6.57E-05 | 1.588002 |  |  |  |  |  |  |  |  |
|  | POF1B | 7.08E-05 | 1.029651 |  |  |  |  |  |  |  |  |
|  | TNFSF15 | 7.27E-05 | 1.101356 |  |  |  |  |  |  |  |  |
|  | EGR3 | 7.58E-05 | -1.42157 |  |  |  |  |  |  |  |  |
|  | ZNF385B | 7.80E-05 | -1.66771 |  |  |  |  |  |  |  |  |
|  | GPR87 | 7.94E-05 | 1.233306 |  |  |  |  |  |  |  |  |
|  | CCL21 | 8.35E-05 | -1.17613 |  |  |  |  |  |  |  |  |
|  | TNFRSF17 | 8.40E-05 | 1.739192 |  |  |  |  |  |  |  |  |
|  | SEMA3E | 8.50E-05 | -1.29891 |  |  |  |  |  |  |  |  |
|  | DIO2 | 8.66E-05 | 1.592477 |  |  |  |  |  |  |  |  |
|  | ATP8A2 | 8.75E-05 | -1.01678 |  |  |  |  |  |  |  |  |
|  | SCGB2A1 | 8.76E-05 | 2.046781 |  |  |  |  |  |  |  |  |
|  | TBC1D30 | 8.79E-05 | 1.016376 |  |  |  |  |  |  |  |  |
|  | FGF13 | 8.97E-05 | 1.065921 |  |  |  |  |  |  |  |  |
|  | NAMPT | 9.44E-05 | -1.44117 |  |  |  |  |  |  |  |  |
|  | DSP | 9.49E-05 | 1.276561 |  |  |  |  |  |  |  |  |
|  | RGS13 | 9.79E-05 | -1.09798 |  |  |  |  |  |  |  |  |
|  | NOX4 | 1.03E-04 | 1.234085 |  |  |  |  |  |  |  |  |
|  | PAQR5 | 1.04E-04 | -1.27788 |  |  |  |  |  |  |  |  |
|  | CEMIP | 1.12E-04 | 1.382594 |  |  |  |  |  |  |  |  |
|  | CILP | 1.19E-04 | 1.370992 |  |  |  |  |  |  |  |  |
|  | DNAJC12 | 1.19E-04 | 1.684691 |  |  |  |  |  |  |  |  |
|  | KIAA2022 | 1.22E-04 | 1.279749 |  |  |  |  |  |  |  |  |
|  | CYP4B1 | 1.26E-04 | -1.8031 |  |  |  |  |  |  |  |  |
|  | FOXA1 | 1.26E-04 | 1.104111 |  |  |  |  |  |  |  |  |
|  | PRTG | 1.29E-04 | -1.21467 |  |  |  |  |  |  |  |  |
|  | IFI6 | 1.40E-04 | 1.343512 |  |  |  |  |  |  |  |  |
|  | RETN | 1.40E-04 | -1.38539 |  |  |  |  |  |  |  |  |
|  | HOXA10 | 1.43E-04 | 1.437868 |  |  |  |  |  |  |  |  |
|  | IGLJ3 | 1.57E-04 | 1.442818 |  |  |  |  |  |  |  |  |
|  | UGT2B15 | 1.66E-04 | 1.214734 |  |  |  |  |  |  |  |  |
|  | PLXNB3 | 1.68E-04 | 1.132647 |  |  |  |  |  |  |  |  |
|  | VNN2 | 1.73E-04 | -1.09082 |  |  |  |  |  |  |  |  |
|  | FOLR3 | 1.74E-04 | -1.31436 |  |  |  |  |  |  |  |  |
|  | SP8 | 1.86E-04 | 1.030804 |  |  |  |  |  |  |  |  |
|  | MATN3 | 1.88E-04 | -1.15106 |  |  |  |  |  |  |  |  |
|  | CHI3L1 | 1.91E-04 | 1.489155 |  |  |  |  |  |  |  |  |
|  | AMER2 | 2.04E-04 | -1.08154 |  |  |  |  |  |  |  |  |
|  | DRAIC | 2.08E-04 | 1.084716 |  |  |  |  |  |  |  |  |
|  | MEOX2 | 2.12E-04 | -1.3456 |  |  |  |  |  |  |  |  |
|  | LTN1 | 2.18E-04 | 1.000686 |  |  |  |  |  |  |  |  |
|  | KIAA1211 | 2.19E-04 | 1.070036 |  |  |  |  |  |  |  |  |
|  | MS4A2 | 2.24E-04 | -1.12884 |  |  |  |  |  |  |  |  |
|  | SPINK5 | 2.27E-04 | 1.704133 |  |  |  |  |  |  |  |  |
|  | SLCO4C1 | 2.38E-04 | -1.1344 |  |  |  |  |  |  |  |  |
|  | ERICH5 | 2.41E-04 | 1.096469 |  |  |  |  |  |  |  |  |
|  | ITPKC | 2.43E-04 | -1.10998 |  |  |  |  |  |  |  |  |
|  | MYRIP | 2.81E-04 | -1.19297 |  |  |  |  |  |  |  |  |
|  | SLC44A5 | 2.82E-04 | 1.49241 |  |  |  |  |  |  |  |  |
|  | MLIP | 2.83E-04 | 1.288869 |  |  |  |  |  |  |  |  |
|  | BEX1 | 2.88E-04 | -1.27611 |  |  |  |  |  |  |  |  |
|  | LINC01133 | 2.97E-04 | 1.241357 |  |  |  |  |  |  |  |  |
|  | IGKV1OR2-108 | 3.11E-04 | 1.280249 |  |  |  |  |  |  |  |  |
|  | AKR1B10 | 3.29E-04 | 1.346393 |  |  |  |  |  |  |  |  |
|  | IGHM | 3.30E-04 | 1.374462 |  |  |  |  |  |  |  |  |
|  | IGKV1OR2-118 | 3.33E-04 | 1.153332 |  |  |  |  |  |  |  |  |
|  | TREM1 | 3.50E-04 | -1.07354 |  |  |  |  |  |  |  |  |
|  | ISG15 | 3.66E-04 | 1.054864 |  |  |  |  |  |  |  |  |
|  | PRLR | 3.80E-04 | 1.168273 |  |  |  |  |  |  |  |  |
|  | PTN | 3.83E-04 | -1.05598 |  |  |  |  |  |  |  |  |
|  | HAS2 | 3.95E-04 | -1.4327 |  |  |  |  |  |  |  |  |
|  | RASEF | 4.15E-04 | 1.007208 |  |  |  |  |  |  |  |  |
|  | SCN1A | 4.19E-04 | -1.11453 |  |  |  |  |  |  |  |  |
|  | IER3 | 4.19E-04 | 1.283024 |  |  |  |  |  |  |  |  |
|  | C1orf87 | 4.22E-04 | -1.13305 |  |  |  |  |  |  |  |  |
|  | WDR72 | 4.31E-04 | 1.402321 |  |  |  |  |  |  |  |  |
|  | ROS1 | 4.35E-04 | 1.402305 |  |  |  |  |  |  |  |  |
|  | INHBB | 4.59E-04 | 1.076623 |  |  |  |  |  |  |  |  |
|  | AGTR2 | 5.00E-04 | -1.44139 |  |  |  |  |  |  |  |  |
|  | QPCT | 5.09E-04 | 1.111592 |  |  |  |  |  |  |  |  |
|  | ITLN1 | 5.12E-04 | -1.48606 |  |  |  |  |  |  |  |  |
|  | HTR2B | 5.24E-04 | 1.353632 |  |  |  |  |  |  |  |  |
|  | LTF | 5.38E-04 | 1.710101 |  |  |  |  |  |  |  |  |
|  | PRG4 | 5.52E-04 | -1.51228 |  |  |  |  |  |  |  |  |
|  | IL20RA | 5.57E-04 | -1.25062 |  |  |  |  |  |  |  |  |
|  | CTSK | 5.60E-04 | 1.035753 |  |  |  |  |  |  |  |  |
|  | CH25H | 6.11E-04 | -1.36691 |  |  |  |  |  |  |  |  |
|  | PMAIP1 | 6.48E-04 | 1.286789 |  |  |  |  |  |  |  |  |
|  | STC1 | 6.88E-04 | -1.13248 |  |  |  |  |  |  |  |  |
|  | PROM1 | 7.05E-04 | 2.127386 |  |  |  |  |  |  |  |  |
|  | IGFBP6 | 7.18E-04 | -1.02603 |  |  |  |  |  |  |  |  |
|  | PTX3 | 7.39E-04 | -1.85398 |  |  |  |  |  |  |  |  |
|  | TFF3 | 7.60E-04 | 1.151004 |  |  |  |  |  |  |  |  |
|  | FDCSP | 7.60E-04 | 1.371596 |  |  |  |  |  |  |  |  |
|  | LGALS4 | 1.02E-03 | 1.73668 |  |  |  |  |  |  |  |  |
|  | CT83 | 1.06E-03 | 1.272644 |  |  |  |  |  |  |  |  |
|  | IL1R2 | 1.07E-03 | -1.40714 |  |  |  |  |  |  |  |  |
|  | PAX9 | 1.07E-03 | 1.012054 |  |  |  |  |  |  |  |  |
|  | MMP10 | 1.07E-03 | 1.025052 |  |  |  |  |  |  |  |  |
|  | AZGP1 | 1.16E-03 | 2.258467 |  |  |  |  |  |  |  |  |
|  | PPP1R1B | 1.18E-03 | 1.085249 |  |  |  |  |  |  |  |  |
|  | AREG | 1.26E-03 | -1.07649 |  |  |  |  |  |  |  |  |
|  | RASGRF1 | 1.28E-03 | -1.03333 |  |  |  |  |  |  |  |  |
|  | ITGBL1 | 1.37E-03 | 1.21168 |  |  |  |  |  |  |  |  |
|  | IGLL5 | 1.38E-03 | 1.157651 |  |  |  |  |  |  |  |  |
|  | MGAM | 1.45E-03 | -1.18586 |  |  |  |  |  |  |  |  |
|  | PTPRZ1 | 1.48E-03 | 1.217301 |  |  |  |  |  |  |  |  |
|  | COL12A1 | 1.56E-03 | -1.04739 |  |  |  |  |  |  |  |  |
|  | VIL1 | 1.57E-03 | 1.025917 |  |  |  |  |  |  |  |  |
|  | HORMAD1 | 1.71E-03 | 1.248852 |  |  |  |  |  |  |  |  |
|  | DNASE2B | 1.74E-03 | -1.03034 |  |  |  |  |  |  |  |  |
|  | LHX9 | 1.93E-03 | 1.254746 |  |  |  |  |  |  |  |  |
|  | SNTN | 2.07E-03 | -1.77943 |  |  |  |  |  |  |  |  |
|  | CFAP52 | 2.08E-03 | -1.00157 |  |  |  |  |  |  |  |  |
|  | APOE | 2.13E-03 | 1.071528 |  |  |  |  |  |  |  |  |
|  | C6 | 2.20E-03 | -1.00417 |  |  |  |  |  |  |  |  |
|  | FAM216B | 2.25E-03 | -1.43771 |  |  |  |  |  |  |  |  |
|  | HPGD | 2.38E-03 | -1.16694 |  |  |  |  |  |  |  |  |
|  | ECM1 | 2.49E-03 | 1.034444 |  |  |  |  |  |  |  |  |
|  | CYP4F3 | 2.51E-03 | -1.13638 |  |  |  |  |  |  |  |  |
|  | NELL1 | 2.69E-03 | 1.059089 |  |  |  |  |  |  |  |  |
|  | PCP4L1 | 2.78E-03 | 1.15819 |  |  |  |  |  |  |  |  |
|  | C11orf88 | 3.56E-03 | -1.05867 |  |  |  |  |  |  |  |  |
|  | FAM83D | 3.78E-03 | 1.161047 |  |  |  |  |  |  |  |  |
|  | ATP13A4-AS1 | 3.79E-03 | 1.928485 |  |  |  |  |  |  |  |  |
|  | C20orf85 | 3.90E-03 | -1.52719 |  |  |  |  |  |  |  |  |
|  | HOXC6 | 4.16E-03 | 1.355448 |  |  |  |  |  |  |  |  |
|  | LOC105375172 | 4.16E-03 | 1.352293 |  |  |  |  |  |  |  |  |
|  | TPSAB1 | 4.19E-03 | -1.01795 |  |  |  |  |  |  |  |  |
|  | C9orf152 | 4.25E-03 | 1.042228 |  |  |  |  |  |  |  |  |
|  | NEK5 | 4.42E-03 | -1.03405 |  |  |  |  |  |  |  |  |
|  | NTRK2 | 4.77E-03 | -1.42198 |  |  |  |  |  |  |  |  |
|  | ZG16B | 5.07E-03 | 1.079892 |  |  |  |  |  |  |  |  |
|  | CATSPERD | 5.15E-03 | -1.26381 |  |  |  |  |  |  |  |  |
|  | MFAP5 | 5.38E-03 | -1.27492 |  |  |  |  |  |  |  |  |
|  | PEG10 | 5.51E-03 | -1.06751 |  |  |  |  |  |  |  |  |
|  | ERICH3 | 6.89E-03 | -1.30811 |  |  |  |  |  |  |  |  |
|  | IGHD | 7.21E-03 | 1.159345 |  |  |  |  |  |  |  |  |
|  | TCN1 | 7.61E-03 | 1.428483 |  |  |  |  |  |  |  |  |
|  | TFF1 | 8.05E-03 | 1.112712 |  |  |  |  |  |  |  |  |
